# Supplementary material for: Phosphinative cyclopropanation of allyl phosphates with lithium phosphides
Source: Royal Society of Chemistry journal article supplement (doi:10.1039/d0cc04854b), 2020-01-01
Supplement: d0cc04854b1.pdf [file d0cc04854b1.pdf]

**Electronic Supplementary Information**  
**for**  
**Phosphinative Cyclopropanation of Allyl Phosphates with Lithium Phosphides**

Ryo Shintani\*, Ayase Ohzono and Kentaro Shirota

Division of Chemistry, Department of Materials Engineering Science, Graduate School of Engineering Science, Osaka University, Toyonaka, Osaka 560-8531, Japan

shintani@chem.es.osaka-u.ac.jp

**I. General**

All reactions were carried out with standard Schlenk techniques under nitrogen unless otherwise noted. NMR spectra were recorded on JEOL JNM-ECS400 or Agilent Unity-Inova500 spectrometer. High resolution mass spectra were recorded on JEOL JMS700 spectrometer. X-ray crystallographic analysis was performed by RIGAKU XTaLAB P200. Preparative GPC was performed with JAI LaboACE LC-5060 equipped with JAIGEL-2HR columns using CHCl<sub>3</sub> as an eluent.

*N,N*-Diisopropylethylamine (Wako Chemicals) was distilled over KOH under vacuum. Pyridine (Nacalai Tesque) was dried over MS4A prior to use. Toluene (Wako Chemicals; dehydrated), CH<sub>2</sub>Cl<sub>2</sub> (Kanto Chemical; dehydrated), Et<sub>2</sub>O (Wako Chemicals; dehydrated), *tert*-butyl methyl ether (Wako Chemicals; dehydrated), cyclopentyl methyl ether (Wako Chemicals; dehydrated), THF (Kanto Chemical; dehydrated), *tert*-butyl bromoacetate (Wako Chemicals), glycoaldehyde (Aldrich), 4-dimethylaminopyridine (Wako Chemicals), diethyl chlorophosphate (Aldrich), triphenylphosphine (Wako Chemicals), dicyclohexylphosphine (Kanto Chemical), dicyclopentylphosphine (Strem Chemicals; 10 wt% solution in hexane), diisopropylphosphine (Acros Organics; 10 wt% solution in hexane), diisobutylphosphine (Strem Chemicals; 10 wt% solution in hexane), di-*tert*-butylphosphine (Acros Organics; 10 wt% solution in hexane), diphenylphosphine (TCI), *n*BuLi (Kanto Chemical; 1.57–1.59 M solution in hexane), hydrogen peroxide (Kishida Chemical; 30wt% solution in H<sub>2</sub>O), *N,N'*-dimethylpropyleneurea (TCI), hexamethylphosphoric triamide (TCI), and lithium (Kishida Chemical; sticks in liquid paraffin) were used as received.

**1a**,<sup>1</sup> **1b**,<sup>2</sup> **1c**,<sup>3</sup> **1d**,<sup>2</sup> **1e**,<sup>4</sup> **1f**,<sup>2</sup> **1g**,<sup>3</sup> **1h**,<sup>2</sup> **1i**,<sup>2</sup> **1j**,<sup>5</sup> **1l**,<sup>2</sup> **1m**,<sup>6</sup> **5**,<sup>7</sup> **6**,<sup>8</sup> (*E*)-4-phenyl-3-buten-2-ol,<sup>9</sup> and 1,2-diphenyltetramethyldisilane<sup>2</sup> were synthesized following the literature procedures.

## II. Synthesis of Substrates

### Diethyl (*E*)-3-(*tert*-butoxycarbonyl)-2-propen-1-yl phosphate (**1k**)

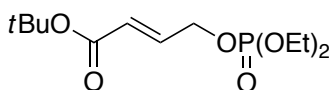

*tert*-Butyl bromoacetate (644  $\mu$ L, 4.39 mmol) was added dropwise to a solution of triphenylphosphine (1.05 g, 4.00 mmol) in toluene (2.3 mL) at 0 °C, and the mixture was stirred for 8 h while gradually raising the temperature to room temperature. The precipitates that formed were collected by filtration with pentane and dried under vacuum. The solid thus obtained was dissolved in  $\text{CH}_2\text{Cl}_2$  (26 mL) and 1.0 M NaOH aq (8.0 mL, 8.0 mmol) was added to it. The resulting mixture was stirred for 1 h at room temperature, and this was extracted with  $\text{CH}_2\text{Cl}_2$ . The organic layer was washed with  $\text{H}_2\text{O}$  and the aqueous layer was extracted with  $\text{CH}_2\text{Cl}_2$  for 3 times. The combined organic layer was washed with saturated NaCl aq, dried over  $\text{Na}_2\text{SO}_4$ , filtered, and concentrated under vacuum to afford *tert*-butyl (triphenylphosphoranylidene)acetate (CAS 35000-38-5) as a white solid (1.21 g, 3.21 mmol; 80% yield). Without further purification, this was added with  $\text{CH}_2\text{Cl}_2$  (8.0 mL) to a solution of glycolaldehyde (109 mg, 0.908 mmol) in  $\text{CH}_2\text{Cl}_2$  (10.5 mL), and the mixture was stirred for 4 h at 40 °C. The solvent was removed under vacuum and the residue was chromatographed on silica gel with hexane/EtOAc = 3/1 to afford *tert*-butyl (*E*)-4-hydroxy-2-butenate (CAS 528846-51-7) as a colorless oil (229 mg, 1.45 mmol; 80% yield).

$^1\text{H}$  NMR ( $\text{CDCl}_3$ ):  $\delta$  6.93 (dt,  $^3J_{\text{HH}} = 15.6$  and 4.3 Hz, 1H), 6.01 (d,  $^3J_{\text{HH}} = 15.8$  Hz and  $^4J_{\text{HH}} = 1.9$  Hz, 1H), 4.33 (dd,  $^3J_{\text{HH}} = 4.1$  Hz and  $^4J_{\text{HH}} = 1.9$  Hz, 2H), 1.54 (s, 1H), 1.49 (s, 9H).

*N,N*-Diisopropylethylamine (489  $\mu$ L, 2.90 mmol) and 4-dimethylaminopyridine (36.0 mg, 0.295 mmol) were added to a solution of *tert*-butyl (*E*)-4-hydroxy-2-butenate (229 mg, 1.45 mmol) in  $\text{CH}_2\text{Cl}_2$  (8.0 mL). Diethyl chlorophosphate (327  $\mu$ L, 2.28 mmol) was added dropwise to it and the mixture was stirred for 18 h at room temperature. The reaction was quenched with saturated  $\text{NaHCO}_3$  aq and this was extracted with  $\text{CH}_2\text{Cl}_2$ . The organic layer was washed with  $\text{H}_2\text{O}$ , and the aqueous layer was extracted with  $\text{CH}_2\text{Cl}_2$  for 2 times. The combined organic layer was washed with saturated  $\text{NH}_4\text{Cl}$  aq, dried over  $\text{MgSO}_4$ , filtered, and concentrated under vacuum. The residue was chromatographed on silica gel with hexane/EtOAc = 1/2 to afford compound **1k** (CAS 528846-27-7) as a yellow oil (383 mg, 1.30 mmol; 90% yield).

$^1\text{H}$  NMR ( $\text{CDCl}_3$ ):  $\delta$  6.82 (dtd,  $^3J_{\text{HH}} = 15.6$  and 4.4 Hz and  $^4J_{\text{HP}} = 1.7$  Hz, 1H), 6.03 (dt,  $^3J_{\text{HH}} = 15.6$  Hz and  $^4J_{\text{HH}} = 1.9$  Hz, 1H), 4.67 (ddd,  $^3J_{\text{HP}} = 7.3$  Hz,  $^3J_{\text{HH}} = 4.4$  Hz, and  $^4J_{\text{HH}} = 1.9$  Hz, 2H), 4.14 (dq,  $^3J_{\text{HP}} = 8.0$  Hz and  $^3J_{\text{HH}} = 7.1$  Hz, 4H), 1.49 (s, 9H), 1.35 (td,  $^3J_{\text{HH}} = 7.1$  Hz,  $^4J_{\text{HP}} = 1.0$  Hz, 6H).  $^{13}\text{C}\{^1\text{H}\}$  NMR ( $\text{CDCl}_3$ ):  $\delta$  165.1, 140.1 (d,  $^3J_{\text{CP}} = 7.7$  Hz), 124.2, 80.8, 65.5 (d,  $^2J_{\text{CP}} = 4.8$  Hz), 64.1 (d,  $^2J_{\text{CP}} = 5.8$  Hz), 28.2, 16.2 (d,  $^3J_{\text{CP}} = 5.8$  Hz).

### Diethyl (*E*)-4-phenyl-3-buten-2-yl phosphate (**1m**)

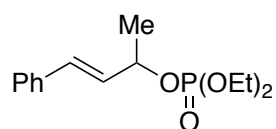

Pyridine (325  $\mu\text{L}$ , 4.02 mmol) and 4-dimethylaminopyridine (49.3 mg, 0.404 mmol) were added to a solution of (*E*)-4-phenyl-3-buten-2-ol (298 mg, 2.01 mmol) in  $\text{CH}_2\text{Cl}_2$  (2.0 mL). Diethyl chlorophosphate (434  $\mu\text{L}$ , 3.02 mmol) was added dropwise to it at 0  $^\circ\text{C}$  and the mixture was stirred for 16 h while gradually raising the temperature to room temperature. The precipitates that formed were filtered off through Celite with  $\text{Et}_2\text{O}$ , and the solvent was removed under vacuum. The residue was purified by GPC with  $\text{CHCl}_3$  to afford compound **1m** as a colorless oil (332 mg, 1.17 mmol; 58% yield).

$^1\text{H}$  NMR ( $\text{CDCl}_3$ ):  $\delta$  7.41-7.34 (m, 2H), 7.34-7.28 (m, 2H), 7.27-7.22 (m, 1H), 6.62 (d,  $^3J_{\text{HH}} = 16.0$  Hz, 1H), 6.22 (dd,  $^3J_{\text{HH}} = 16.0$  and 7.3 Hz, 1H), 5.15-5.04 (m, 1H), 4.17-4.03 (m, 4H), 1.50 (d,  $^3J_{\text{HH}} = 6.4$  Hz, 3H), 1.32 (td,  $^3J_{\text{HH}} = 7.1$  Hz and  $^4J_{\text{HP}} = 0.9$  Hz, 3H), 1.28 (td,  $^3J_{\text{HH}} = 7.1$  Hz and  $^4J_{\text{HP}} = 0.9$  Hz, 3H).  $^{13}\text{C}\{^1\text{H}\}$  NMR ( $\text{CDCl}_3$ ):  $\delta$  136.3, 131.7, 129.4 (d,  $^3J_{\text{CP}} = 5.8$  Hz), 128.7, 128.2, 126.8, 75.9 (d,  $^2J_{\text{CP}} = 4.8$  Hz), 63.74 (d,  $^2J_{\text{CP}} = 5.8$  Hz), 63.69 (d,  $^2J_{\text{CP}} = 4.8$  Hz), 22.5 (d,  $^3J_{\text{CP}} = 4.8$  Hz), 16.2 (d,  $^3J_{\text{CP}} = 6.7$  Hz). HRMS (FAB) calcd for  $\text{C}_{14}\text{H}_{21}\text{O}_4\text{P}$  ( $\text{M}^+$ ) 284.1172, found 284.1176.

### III. Cyclopropanation Reactions

#### Procedure for Table 1, Entry 4.

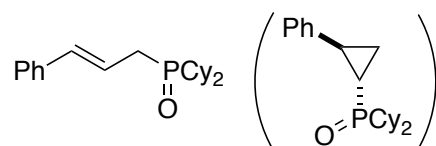

*n*BuLi (283  $\mu\text{L}$ , 0.450 mmol; 1.59 M solution in hexane) was added to a solution of dicyclohexylphosphine (98.7  $\mu\text{L}$ , 0.450 mmol) in cyclopentyl methyl ether (1.5 mL) at 0  $^\circ\text{C}$ . Compound **1a** (81.7 mg, 0.302 mmol) was added to it and the mixture was stirred for 3 h at 20  $^\circ\text{C}$ .  $\text{H}_2\text{O}_2$  (221  $\mu\text{L}$ , 2.16 mmol; 30 wt% solution in  $\text{H}_2\text{O}$ ) was then added to it and the resulting mixture was stirred for 2 h at room temperature. This was extracted with  $\text{Et}_2\text{O}$  and the organic layer was washed with  $\text{H}_2\text{O}$ . The aqueous layer was extracted with  $\text{Et}_2\text{O}$  for 3 times, and the combined organic layer was washed with saturated NaCl(aq), dried over  $\text{MgSO}_4$ , filtered, and concentrated under vacuum. The residue was purified by GPC with  $\text{CHCl}_3$  to afford a mixture of compounds **3aa/4aa** as a white solid (70.9 mg, 0.215 mmol; 71% yield, (**3aa/4aa** = 3/97)).

**4aa**:  $^1\text{H}$  NMR ( $\text{CDCl}_3$ ):  $\delta$  7.35 (d,  $^3J_{\text{HH}} = 7.3$  Hz, 2H), 7.31 (t,  $^3J_{\text{HH}} = 7.7$  Hz, 2H), 7.23 (t,  $^3J_{\text{HH}} = 7.2$  Hz, 1H), 6.51 (dd,  $^3J_{\text{HH}} = 15.8$  Hz and  $^4J_{\text{HP}} = 3.1$  Hz, 1H), 6.25 (dtd,  $^3J_{\text{HH}} = 15.8$  and 7.6 Hz and  $^3J_{\text{HP}} = 5.1$  Hz, 1H), 2.74 (dd,  $^2J_{\text{HP}} = 13.8$  Hz and  $^3J_{\text{HH}} = 7.5$  Hz, 2H), 2.07-1.63 (m, 12H), 1.55-1.38

(m, 4H), 1.34-1.16 (m, 6H).  $^{13}\text{C}\{^1\text{H}\}$  NMR ( $\text{CDCl}_3$ ):  $\delta$  137.0 (d,  $^4J_{\text{CP}} = 1.9$  Hz), 134.1 (d,  $^2J_{\text{CP}} = 11.5$  Hz), 128.6, 127.5, 126.2, 120.6 (d,  $^3J_{\text{CP}} = 7.7$  Hz), 36.2 (d,  $^1J_{\text{CP}} = 63.3$  Hz), 30.0 (d,  $^1J_{\text{CP}} = 57.5$  Hz), 26.7 (d,  $J_{\text{CP}} = 12.5$  Hz), 26.6 (d,  $J_{\text{CP}} = 11.5$  Hz), 26.0, 25.9 (d,  $J_{\text{CP}} = 2.9$  Hz), 25.5 (d,  $J_{\text{CP}} = 2.9$  Hz).  $^{31}\text{P}\{^1\text{H}\}$  NMR ( $\text{CDCl}_3$ ):  $\delta$  49.5 (s). HRMS (FAB) calcd for  $\text{C}_{21}\text{H}_{32}\text{OP}$  ( $\text{M}+\text{H}^+$ ) 331.2185, found 331.2194.

### General Procedure for Table 2, Equations 1–3, and Scheme 2.

Hexamethylphosphoric triamide (HMPA; 83.5  $\mu\text{L}$ , 0.480 mmol) and THF (0.5 mL) were added to a solution of dicyclohexylphosphine (98.7  $\mu\text{L}$ , 0.450 mmol) in THF (1.0 mL), and the mixture was cooled to 0  $^\circ\text{C}$ . *n*BuLi (287  $\mu\text{L}$ , 0.450 mmol; 1.57 M solution in hexane) was added to it, and the mixture was cooled to  $-78$   $^\circ\text{C}$ . Compound **1**, **5**, or **6** (0.300 mmol) was added to it and the resulting mixture was stirred for 3 h at  $-78$   $^\circ\text{C}$ .  $\text{H}_2\text{O}_2$  (110  $\mu\text{L}$ , 1.08 mmol; 30 wt% solution in  $\text{H}_2\text{O}$ ) was then added to it and the resulting mixture was stirred for 1 h at room temperature. This was extracted with  $\text{Et}_2\text{O}$  and the organic layer was washed with  $\text{H}_2\text{O}$  for 3 times. The aqueous layer was extracted with  $\text{Et}_2\text{O}$ , and the combined organic layer was washed with saturated NaCl aq, dried over  $\text{MgSO}_4$ , filtered, and concentrated under vacuum. The residue was purified by GPC with  $\text{CHCl}_3$  to afford compounds **3/4**.

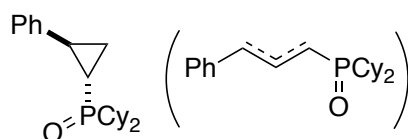

**Table 2, Entry 1 (Compound 3aa).** Colorless oil. 77% yield (**3aa**/**4aa**+**4aa'**) = 92/8, **4aa**/**4aa'** = 88/12, containing ca. 4% inseparable dicyclohexyl(3-phenylpropyl)phosphine oxide).

$^1\text{H}$  NMR ( $\text{CDCl}_3$ ):  $\delta$  7.32-7.25 (m, 2H), 7.22-7.16 (m, 1H), 7.14-7.07 (m, 2H), 2.46-2.34 (m, 1H), 2.08-1.58 (m, 12H), 1.57-1.10 (m, 12H), 0.86-0.73 (m, 1H).  $^{13}\text{C}\{^1\text{H}\}$  NMR ( $\text{CDCl}_3$ ):  $\delta$  141.0 (d,  $^3J_{\text{CP}} = 1.9$  Hz), 128.7, 126.3, 126.0, 36.9 (d,  $^1J_{\text{CP}} = 67.1$  Hz), 36.4 (d,  $^1J_{\text{CP}} = 68.1$  Hz), 26.8 (d,  $J_{\text{CP}} = 13.4$  Hz), 26.7, 26.64, 26.62 (d,  $J_{\text{CP}} = 11.5$  Hz), 26.21 (d,  $J_{\text{CP}} = 1.9$  Hz), 26.16, 26.04, 26.03 (d,  $J_{\text{CP}} = 2.9$  Hz), 25.5 (d,  $J_{\text{CP}} = 2.9$  Hz), 25.3 (d,  $J_{\text{CP}} = 2.9$  Hz), 18.8 (d,  $^2J_{\text{CP}} = 2.9$  Hz), 13.8 (d,  $^1J_{\text{CP}} = 84.4$  Hz) 11.4 (d,  $^2J_{\text{CP}} = 3.8$  Hz).  $^{31}\text{P}\{^1\text{H}\}$  NMR ( $\text{CDCl}_3$ ):  $\delta$  48.0 (s). HRMS (FAB) calcd for  $\text{C}_{21}\text{H}_{32}\text{OP}$  ( $\text{M}+\text{H}^+$ ) 331.2185, found 331.2191.

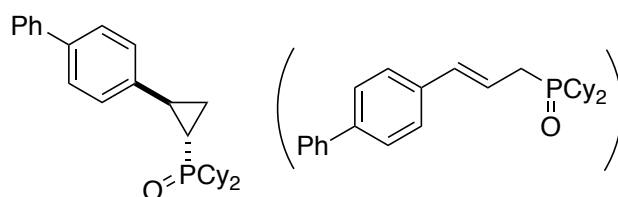

**Table 2, Entry 2 (Compound 3ba).** White solid. 80% yield (**3ba**/**4ba** = 97/3).

$^1\text{H}$  NMR ( $\text{CDCl}_3$ ):  $\delta$  7.61-7.55 (m, 2H), 7.52 (d,  $^3J_{\text{HH}} = 8.2$  Hz, 2H), 7.43 (t,  $^3J_{\text{HH}} = 7.6$  Hz, 2H),

7.36-7.30 (m, 1H), 7.18 (d,  $^3J_{\text{HH}} = 8.2$  Hz, 2H), 2.51-2.38 (m, 1H), 2.10-1.63 (m, 12H), 1.61-1.12 (m, 12H), 0.90-0.77 (m, 1H).  $^{13}\text{C}\{^1\text{H}\}$  NMR ( $\text{CDCl}_3$ ):  $\delta$  140.8, 140.1 (d,  $^3J_{\text{CP}} = 1.9$  Hz), 139.3, 128.8, 127.4, 127.3, 127.0, 126.4, 36.8 (d,  $^1J_{\text{CP}} = 67.1$  Hz), 36.4 (d,  $^1J_{\text{CP}} = 68.1$  Hz), 26.745 (d,  $J_{\text{CP}} = 12.5$  Hz), 26.740, 26.62, 26.60 (d,  $J_{\text{CP}} = 12.5$  Hz), 26.2 (d,  $J_{\text{CP}} = 2.9$  Hz), 26.1, 26.0, 25.5 (d,  $J_{\text{CP}} = 3.8$  Hz), 25.3 (d,  $J_{\text{CP}} = 3.8$  Hz), 18.6 (d,  $^2J_{\text{CP}} = 2.9$  Hz), 13.9 (d,  $^1J_{\text{CP}} = 83.4$  Hz), 11.5 (d,  $^2J_{\text{CP}} = 3.8$  Hz).  $^{31}\text{P}\{^1\text{H}\}$  NMR ( $\text{CDCl}_3$ ):  $\delta$  48.1 (s). HRMS (FAB) calcd for  $\text{C}_{27}\text{H}_{36}\text{OP}$  ( $\text{M}+\text{H}^+$ ) 407.2498, found 407.2505.

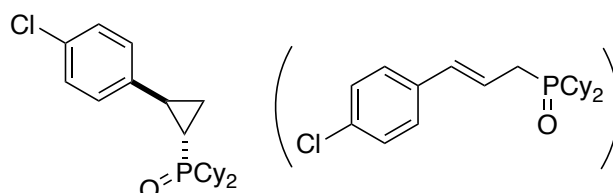

**Table 2, Entry 3 (Compound 3ca).** White solid. 76% yield (**3ca/4ca** = 99/1).

$^1\text{H}$  NMR ( $\text{CDCl}_3$ ):  $\delta$  7.25 (d,  $^3J_{\text{HH}} = 8.7$  Hz, 2H), 7.02 (d,  $^3J_{\text{HH}} = 8.7$  Hz, 2H), 2.43-2.28 (m, 1H), 2.07-1.59 (m, 12H), 1.57-1.05 (m, 12H), 0.81-0.67 (m, 1H).  $^{13}\text{C}\{^1\text{H}\}$  NMR ( $\text{CDCl}_3$ ):  $\delta$  139.6 (d,  $^3J_{\text{CP}} = 2.9$  Hz), 132.0, 128.8, 127.2, 36.8 (d,  $^1J_{\text{CP}} = 67.1$  Hz), 36.4 (d,  $^1J_{\text{CP}} = 68.0$  Hz), 26.71 (d,  $J_{\text{CP}} = 12.5$  Hz), 26.70, 26.58, 26.56 (d,  $J_{\text{CP}} = 12.5$  Hz), 26.2 (d,  $J_{\text{CP}} = 2.9$  Hz), 26.10, 26.06 (d,  $J_{\text{CP}} = 2.9$  Hz), 26.0, 25.5 (d,  $J_{\text{CP}} = 3.8$  Hz), 25.3 (d,  $J_{\text{CP}} = 2.9$  Hz), 18.3 (d,  $^2J_{\text{CP}} = 2.9$  Hz), 14.1 (d,  $^1J_{\text{CP}} = 83.4$  Hz), 11.6 (d,  $^2J_{\text{CP}} = 4.8$  Hz).  $^{31}\text{P}\{^1\text{H}\}$  NMR ( $\text{CDCl}_3$ ):  $\delta$  47.9 (s). HRMS (FAB) calcd for  $\text{C}_{21}\text{H}_{31}\text{ClOP}$  ( $\text{M}+\text{H}^+$ ) 365.1796, found 365.1795.

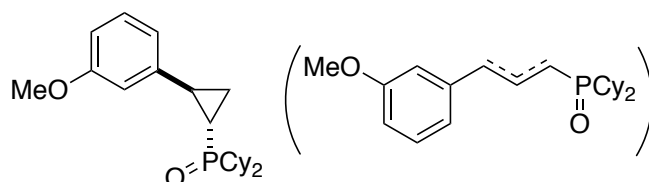

**Table 2, Entry 4 (Compound 3da).** Colorless oil. 86% yield (**3da/(4da+4da')** = 90/10, **4da/4da'** = 89/11, containing ca. 3% inseparable dicyclohexyl(3-(3-methoxyphenyl)propyl)phosphine oxide).

$^1\text{H}$  NMR ( $\text{CDCl}_3$ ):  $\delta$  7.20 (t,  $^3J_{\text{HH}} = 8.0$  Hz, 1H), 6.74 (dd,  $^3J_{\text{HH}} = 8.2$  Hz and  $^4J_{\text{HH}} = 2.3$  Hz, 1H), 6.70 (d,  $^3J_{\text{HH}} = 7.8$  Hz, 1H), 6.65 (t,  $^4J_{\text{HH}} = 2.1$  Hz, 1H), 3.80 (s, 3H), 2.43-2.32 (m, 1H), 2.08-1.59 (m, 12H), 1.56-1.10 (m, 12H), 0.85-0.74 (m, 1H).  $^{13}\text{C}\{^1\text{H}\}$  NMR ( $\text{CDCl}_3$ ):  $\delta$  159.9, 142.6 (d,  $^3J_{\text{CP}} = 1.9$  Hz), 129.6, 118.2, 112.0, 111.4, 55.2, 36.7 (d,  $^1J_{\text{CP}} = 67.1$  Hz), 36.3 (d,  $^1J_{\text{CP}} = 68.1$  Hz), 26.646 (d,  $J_{\text{CP}} = 12.5$  Hz), 26.645, 26.53, 26.52 (d,  $J_{\text{CP}} = 12.5$  Hz), 26.08 (d,  $J_{\text{CP}} = 1.9$  Hz), 26.05, 25.94, 25.92 (d,  $J_{\text{CP}} = 1.9$  Hz), 25.4 (d,  $J_{\text{CP}} = 2.9$  Hz), 25.2 (d,  $J_{\text{CP}} = 3.8$  Hz), 18.8 (d,  $^2J_{\text{CP}} = 2.9$  Hz), 13.7 (d,  $^1J_{\text{CP}} = 84.4$  Hz), 11.4 (d,  $^2J_{\text{CP}} = 4.8$  Hz).  $^{31}\text{P}\{^1\text{H}\}$  NMR ( $\text{CDCl}_3$ ):  $\delta$  48.0 (s). HRMS (FAB) calcd for  $\text{C}_{22}\text{H}_{34}\text{O}_2\text{P}$  ( $\text{M}+\text{H}^+$ ) 361.2291, found 361.2292.

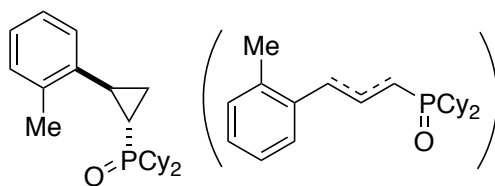

**Table 2, Entry 5 (Compound 3ea).** White solid. 67% yield (**3ea**/(**4ea**+**4ea'**) = 90/10, **4ea**/**4ea'** = 65/35, containing ca. 2% inseparable dicyclohexyl(3-(2-methylphenyl)propyl)phosphine oxide).

$^1\text{H}$  NMR ( $\text{CDCl}_3$ ):  $\delta$  7.20-7.09 (m, 3H), 6.91-6.85 (m, 1H), 2.51-2.40 (m, 1H), 2.43 (s, 3H), 2.08-1.15 (m, 23H), 1.08-0.96 (m, 1H), 0.94-0.84 (m, 1H).  $^{13}\text{C}\{^1\text{H}\}$  NMR ( $\text{CDCl}_3$ ):  $\delta$  138.8 (d,  $^3J_{\text{CP}} = 2.9$  Hz), 138.1, 130.2, 126.3, 126.0, 124.4, 36.8 (d,  $^1J_{\text{CP}} = 68.1$  Hz), 36.7 (d,  $^1J_{\text{CP}} = 67.1$  Hz), 26.8 (d,  $J_{\text{CP}} = 3.8$  Hz), 26.7 (d,  $J_{\text{CP}} = 12.5$  Hz), 26.64 (d,  $J_{\text{CP}} = 1.9$  Hz), 26.61 (d,  $J_{\text{CP}} = 11.5$  Hz), 26.2 (d,  $J_{\text{CP}} = 2.9$  Hz), 26.13, 26.08, 26.07 (d,  $J_{\text{CP}} = 1.9$  Hz), 25.5 (d,  $J_{\text{CP}} = 3.8$  Hz), 25.3 (d,  $J_{\text{CP}} = 2.9$  Hz), 19.8, 16.7 (d,  $^2J_{\text{CP}} = 2.9$  Hz), 11.6 (d,  $^2J_{\text{CP}} = 4.8$  Hz), 10.4 (d,  $^1J_{\text{CP}} = 84.4$  Hz).  $^{31}\text{P}\{^1\text{H}\}$  NMR ( $\text{CDCl}_3$ ):  $\delta$  48.3 (s). HRMS (FAB) calcd for  $\text{C}_{22}\text{H}_{34}\text{OP}$  ( $\text{M}+\text{H}^+$ ) 345.2342, found 345.2349.

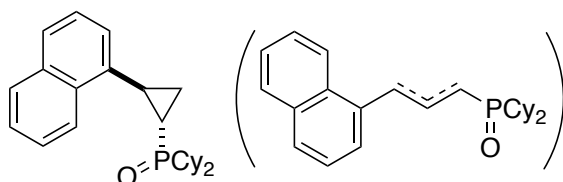

**Table 2, Entry 6 (Compound 3fa).** White solid. 97% yield (**3fa**/(**4fa**+**4fa'**) = 97/3, **4fa**/**4fa'** = 50/50).

$^1\text{H}$  NMR ( $\text{CDCl}_3$ ):  $\delta$  8.38 (d,  $^3J_{\text{HH}} = 8.2$  Hz, 1H), 7.88-7.83 (m, 1H), 7.75 (d,  $^3J_{\text{HH}} = 8.3$  Hz, 1H), 7.56 (ddd,  $^3J_{\text{HH}} = 8.2$  and 6.8 Hz and  $^4J_{\text{HH}} = 1.4$  Hz, 1H), 7.51 (td,  $^3J_{\text{HH}} = 7.3$  Hz and  $^4J_{\text{HH}} = 1.4$  Hz, 1H), 7.40 (t,  $^3J_{\text{HH}} = 7.6$  Hz, 1H), 7.16 (d,  $^3J_{\text{HH}} = 6.8$  Hz, 1H), 3.03-2.92 (m, 1H), 2.12-1.63 (m, 13H), 1.61-1.42 (m, 4H), 1.39-1.12 (m, 7H), 1.07-0.96 (m, 1H).  $^{13}\text{C}\{^1\text{H}\}$  NMR ( $\text{CDCl}_3$ ):  $\delta$  136.9 (d,  $^3J_{\text{CP}} = 2.9$  Hz), 133.7, 133.3, 128.5, 127.3, 126.2, 126.1, 125.3, 124.4, 122.5, 36.9 (d,  $^1J_{\text{CP}} = 68.1$  Hz), 36.9 (d,  $^1J_{\text{CP}} = 67.1$  Hz), 26.8 (d,  $J_{\text{CP}} = 3.8$  Hz), 26.7 (d,  $J_{\text{CP}} = 12.5$  Hz), 26.64 (d,  $J_{\text{CP}} = 3.8$  Hz), 26.61 (d,  $J_{\text{CP}} = 11.5$  Hz), 26.21 (d,  $J_{\text{CP}} = 1.9$  Hz), 26.16 (d,  $J_{\text{CP}} = 2.9$  Hz), 26.12 (d,  $J_{\text{CP}} = 1.9$  Hz), 26.10 (d,  $J_{\text{CP}} = 1.9$  Hz), 25.5 (d,  $J_{\text{CP}} = 3.8$  Hz), 25.4 (d,  $J_{\text{CP}} = 2.9$  Hz), 16.6 (d,  $^2J_{\text{CP}} = 2.9$  Hz), 11.5 (d,  $^2J_{\text{CP}} = 4.8$  Hz), 9.7 (d,  $^1J_{\text{CP}} = 85.3$  Hz).  $^{31}\text{P}\{^1\text{H}\}$  NMR ( $\text{CDCl}_3$ ):  $\delta$  48.4 (s). HRMS (FAB) calcd for  $\text{C}_{25}\text{H}_{34}\text{OP}$  ( $\text{M}+\text{H}^+$ ) 381.2342, found 381.2348.

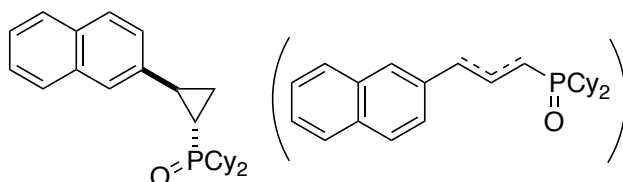

**Table 2, Entry 7 (Compound 3ga).** White solid. 86% yield (**3ga**/(**4ga**+**4ga'**) = 97/3, **4ga**/**4ga'** = 96/4).

$^1\text{H}$  NMR ( $\text{CDCl}_3$ ):  $\delta$  7.83-7.74 (m, 3H), 7.56 (s, 1H), 7.50-7.38 (m, 2H), 7.21 (dd,  $^3J_{\text{HH}} = 8.7$  Hz and  $^4J_{\text{HH}} = 1.4$  Hz, 1H), 2.63-2.52 (m, 1H), 2.11-1.07 (m, 24H), 0.98-0.85 (m, 1H).  $^{13}\text{C}\{^1\text{H}\}$  NMR ( $\text{CDCl}_3$ ):  $\delta$  138.5 (d,  $^3J_{\text{CP}} = 1.9$  Hz), 133.6, 132.3, 128.3, 127.7, 127.4, 126.3, 125.4, 124.3, 124.2, 36.8

(d,  $J_{CP} = 68.1$  Hz), 36.4 (d,  $J_{CP} = 68.1$  Hz), 26.69 (d,  $J_{CP} = 13.4$  Hz), 26.68 (d,  $J_{CP} = 2.9$  Hz), 26.6 (d,  $J_{CP} = 2.9$  Hz), 26.5 (d,  $J_{CP} = 12.5$  Hz), 26.13 (d,  $J_{CP} = 2.9$  Hz), 26.09 (d,  $J_{CP} = 1.9$  Hz), 26.0 (d,  $J_{CP} = 2.9$  Hz), 25.9, 25.5 (d,  $J_{CP} = 2.9$  Hz), 25.3 (d,  $J_{CP} = 2.9$  Hz), 19.0 (d,  $^2J_{CP} = 2.9$  Hz), 13.9 (d,  $^1J_{CP} = 83.4$  Hz), 11.6 (d,  $^2J_{CP} = 4.8$  Hz).  $^{31}\text{P}\{^1\text{H}\}$  NMR ( $\text{CDCl}_3$ ):  $\delta$  48.1 (s). HRMS (FAB) calcd for  $\text{C}_{25}\text{H}_{34}\text{OP}$  ( $\text{M}+\text{H}^+$ ) 381.2342, found 381.2343.

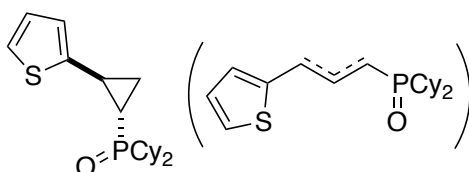

**Table 2, Entry 8 (Compound 3ha).** Colorless oil. 82% yield (**3ha**/(**4ha**+**4ha'**) = 90/10, **4ha**/**4ha'** = 80/20).

$^1\text{H}$  NMR ( $\text{CDCl}_3$ ):  $\delta$  7.09 (dd,  $^3J_{\text{HH}} = 5.1$  Hz and  $^4J_{\text{HH}} = 1.2$  Hz, 1H), 6.91 (dd,  $^3J_{\text{HH}} = 5.1$  and 3.4 Hz, 1H), 6.85-6.82 (m, 1H), 2.65-2.57 (m, 1H), 2.07-1.63 (m, 12H), 1.58-1.38 (m, 5H), 1.34-1.18 (m, 7H), 0.87-0.77 (m, 1H).  $^{13}\text{C}\{^1\text{H}\}$  NMR ( $\text{CDCl}_3$ ):  $\delta$  145.4 (d,  $^3J_{CP} = 2.9$  Hz), 127.0, 123.7, 122.8, 36.7 (d,  $^1J_{CP} = 67.1$  Hz), 36.5 (d,  $^1J_{CP} = 68.0$  Hz), 26.7 (d,  $J_{CP} = 12.5$  Hz), 26.6 (d,  $J_{CP} = 11.5$  Hz), 26.13 (d,  $J_{CP} = 1.9$  Hz), 26.06, 26.0 (d,  $J_{CP} = 1.9$  Hz), 25.4 (d,  $J_{CP} = 2.9$  Hz), 25.3 (d,  $J_{CP} = 3.8$  Hz), 14.7 (d,  $^2J_{CP} = 3.8$  Hz), 14.5 (d,  $^1J_{CP} = 82.4$  Hz), 12.0 (d,  $^2J_{CP} = 3.8$  Hz).  $^{31}\text{P}\{^1\text{H}\}$  NMR ( $\text{CDCl}_3$ ):  $\delta$  47.6 (s). HRMS (FAB) calcd for  $\text{C}_{19}\text{H}_{30}\text{OPS}$  ( $\text{M}+\text{H}^+$ ) 337.1749, found 337.1756.

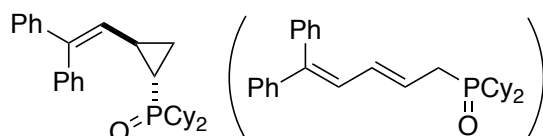

**Table 2, Entry 9 (Compound 3ia).** The reaction was conducted in the absence of HMPA. Colorless oil. 82% yield (**3ia**/**4ia** = 96/4, *trans*/*cis* = 96/4 for **3ia**).

$^1\text{H}$  NMR ( $\text{CDCl}_3$ ):  $\delta$  7.38 (t,  $^3J_{\text{HH}} = 7.4$  Hz, 1H), 7.34-7.18 (m, 8H), 5.46 (d,  $^3J_{\text{HH}} = 10.2$  Hz, 1H), 2.26-1.15 (m, 24H), 1.03-0.95 (m, 1H), 0.69-0.59 (m, 1H).  $^{13}\text{C}\{^1\text{H}\}$  NMR ( $\text{CDCl}_3$ ):  $\delta$  142.34, 142.26, 139.6, 131.0 (d,  $^3J_{CP} = 2.9$  Hz), 130.0, 128.5, 128.3, 127.4, 127.1, 127.0, 36.9 (d,  $^1J_{CP} = 67.1$  Hz), 36.4 (d,  $^1J_{CP} = 68.1$  Hz), 26.74 (d,  $J_{CP} = 10.5$  Hz), 26.70 (d,  $J_{CP} = 12.5$  Hz), 26.65 (d,  $J_{CP} = 3.8$  Hz), 26.5 (d,  $J_{CP} = 3.8$  Hz), 26.14, 26.12, 26.07 (d,  $J_{CP} = 1.9$  Hz), 25.4 (d,  $J_{CP} = 3.8$  Hz), 25.2 (d,  $J_{CP} = 2.9$  Hz), 15.8 (d,  $^2J_{CP} = 2.9$  Hz), 12.2 (d,  $^1J_{CP} = 83.4$  Hz), 10.9 (d,  $^2J_{CP} = 4.8$  Hz).  $^{31}\text{P}\{^1\text{H}\}$  NMR ( $\text{CDCl}_3$ ):  $\delta$  47.5 (s). HRMS (FAB) calcd for  $\text{C}_{29}\text{H}_{38}\text{OP}$  ( $\text{M}+\text{H}^+$ ) 433.2655, found 433.2663.

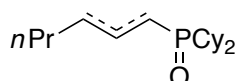

**Table 2, Entry 10 (Compound 4ja).** Yellow oil. 90% yield (**3ja**/(**4ja**+**4ja'**) = 0/100, **4ja**/**4ja'** = 94/6).

$^1\text{H}$  NMR ( $\text{CDCl}_3$ ):  $\delta$  5.64-5.53 (m, 1H), 5.52-5.40 (m, 1H), 2.55 (dd,  $^2J_{\text{HP}} = 14.1$  Hz and  $^3J_{\text{HH}} = 7.3$  Hz, 2H), 2.08-1.65 (m, 14H), 1.53-1.16 (m, 12H), 0.90 (t,  $^3J_{\text{HH}} = 7.3$  Hz, 3H).  $^{13}\text{C}\{^1\text{H}\}$  NMR ( $\text{CDCl}_3$ ):

$\delta$  135.6 (d,  $^2J_{CP} = 11.5$  Hz), 120.1 (d,  $^3J_{CP} = 8.6$  Hz), 35.9 (d,  $^1J_{CP} = 63.3$  Hz), 34.8, 29.3 (d,  $^1J_{CP} = 58.5$  Hz), 26.7 (d,  $J_{CP} = 11.5$  Hz), 26.6 (d,  $J_{CP} = 11.5$  Hz), 26.1, 25.8, 25.5, 22.5, 13.7.  $^{31}\text{P}\{^1\text{H}\}$  NMR ( $\text{CDCl}_3$ ):  $\delta$  49.5 (s). HRMS (FAB) calcd for  $\text{C}_{18}\text{H}_{34}\text{OP}$  ( $\text{M}+\text{H}^+$ ) 297.2342, found 297.2348.

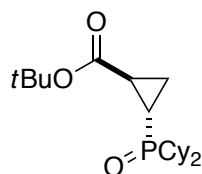

**Table 2, Entry 11 (Compound 3ka).** The reaction was conducted in the absence of HMPA. White solid. 70% yield (**3ka/4ka** = 100/0).

$^1\text{H}$  NMR ( $\text{CDCl}_3$ ):  $\delta$  2.30-1.15 (m, 25H), 1.45 (s, 9H), 1.13-0.90 (m, 1H).  $^{13}\text{C}\{^1\text{H}\}$  NMR ( $\text{CDCl}_3$ ):  $\delta$  172.3, 81.0, 36.9 (br), 36.1 (br), 28.1, 26.60, 26.58, 26.56, 26.12, 26.08, 26.0, 25.22, 25.17, 17.2, 12.6 (br), 9.6.  $^{31}\text{P}\{^1\text{H}\}$  NMR ( $\text{CDCl}_3$ ):  $\delta$  47.9 (s). HRMS (FAB) calcd for  $\text{C}_{20}\text{H}_{36}\text{O}_3\text{P}$  ( $\text{M}+\text{H}^+$ ) 355.2397, found 355.2395.

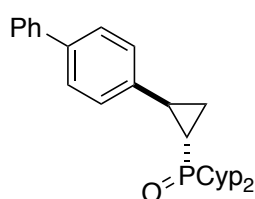

**Table 2, Entry 12 (Compound 3bb).** White solid. 70% yield (**3bb/4bb** = 100/0).

$^1\text{H}$  NMR ( $\text{CDCl}_3$ ):  $\delta$  7.60-7.54 (m, 2H), 7.51 (d,  $^3J_{\text{HH}} = 8.2$  Hz, 2H), 7.43 (t,  $^3J_{\text{HH}} = 7.6$  Hz, 2H), 7.33 (t,  $^3J_{\text{HH}} = 7.3$  Hz, 1H), 7.18 (d,  $^3J_{\text{HH}} = 8.2$  Hz, 2H), 2.58-2.47 (m, 1H), 2.25-2.04 (m, 2H), 2.03-1.47 (m, 17H), 1.30-1.19 (m, 1H), 0.97-0.84 (m, 1H).  $^{13}\text{C}\{^1\text{H}\}$  NMR ( $\text{CDCl}_3$ ):  $\delta$  140.8, 140.3 (d,  $^3J_{CP} = 2.9$  Hz), 139.2, 128.8, 127.3, 127.2, 127.0, 126.3, 38.7 (d,  $^1J_{CP} = 70.9$  Hz), 38.5 (d,  $^1J_{CP} = 71.9$  Hz), 27.064, 27.055 (d,  $J_{CP} = 1.9$  Hz), 26.6 (d,  $J_{CP} = 1.9$  Hz), 26.5 (d,  $J_{CP} = 2.9$  Hz), 26.43 (d,  $J_{CP} = 9.6$  Hz), 26.42, 26.32, 26.30 (d,  $J_{CP} = 9.6$  Hz), 18.8 (d,  $^2J_{CP} = 2.9$  Hz), 15.8 (d,  $^1J_{CP} = 87.2$  Hz), 11.5 (d,  $^2J_{CP} = 4.8$  Hz).  $^{31}\text{P}\{^1\text{H}\}$  NMR ( $\text{CDCl}_3$ ):  $\delta$  48.2 (s). HRMS (FAB) calcd for  $\text{C}_{25}\text{H}_{32}\text{OP}$  ( $\text{M}+\text{H}^+$ ) 379.2185, found 379.2192.

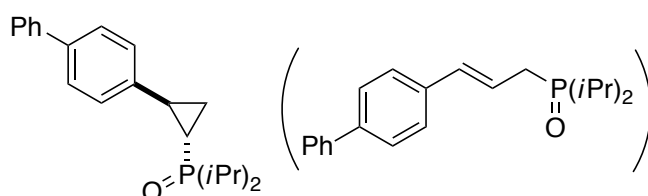

**Table 2, Entry 13 (Compound 3bc).** Colorless oil. 82% yield (**3bc/4bc** = 97/3).

$^1\text{H}$  NMR ( $\text{CDCl}_3$ ):  $\delta$  7.60-7.54 (m, 2H), 7.52 (d,  $^3J_{\text{HH}} = 8.2$  Hz, 2H), 7.43 (t,  $^3J_{\text{HH}} = 7.6$  Hz, 2H), 7.33 (t,  $^3J_{\text{HH}} = 7.3$  Hz, 1H), 7.18 (d,  $^3J_{\text{HH}} = 8.2$  Hz, 2H), 2.55-2.43 (m, 1H), 2.20-2.00 (m, 2H), 1.65-



1.51 (m, 1H), 1.36-1.14 (m, 13H), 0.95-0.80 (m, 1H).  $^{13}\text{C}\{^1\text{H}\}$  NMR ( $\text{CDCl}_3$ ):  $\delta$  140.7, 139.9 (d,  $^3J_{\text{CP}} = 1.9$  Hz), 139.2, 128.8, 127.3, 127.2, 126.9, 126.2, 26.5 (d,  $^1J_{\text{CP}} = 67.1$  Hz), 26.2 (d,  $^1J_{\text{CP}} = 68.1$  Hz), 18.4 (d,  $^2J_{\text{CP}} = 2.9$  Hz), 16.3 (d,  $^2J_{\text{CP}} = 1.9$  Hz), 16.2 (d,  $^2J_{\text{CP}} = 1.9$  Hz), 15.7 (d,  $^2J_{\text{CP}} = 3.8$  Hz), 15.6 (d,  $^2J_{\text{CP}} = 2.9$  Hz), 13.2 (d,  $^1J_{\text{CP}} = 84.4$  Hz), 11.3 (d,  $^2J_{\text{CP}} = 4.8$  Hz).  $^{31}\text{P}\{^1\text{H}\}$  NMR ( $\text{CDCl}_3$ ):  $\delta$  53.1 (s). HRMS (FAB) calcd for  $\text{C}_{21}\text{H}_{28}\text{OP}$  ( $\text{M}+\text{H}^+$ ) 327.1872, found 327.1869.

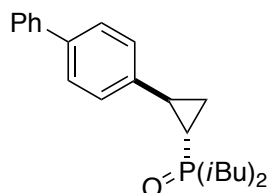

**Table 2, Entry 14 (Compound 3bd).** White solid. 86% yield (**3bd/4bd** = 100/0).

$^1\text{H}$  NMR ( $\text{CDCl}_3$ ):  $\delta$  7.60-7.55 (m, 2H), 7.52 (d,  $^3J_{\text{HH}} = 8.5$  Hz, 2H), 7.43 (t,  $^3J_{\text{HH}} = 7.6$  Hz, 2H), 7.33 (t,  $^3J_{\text{HH}} = 7.4$  Hz, 1H), 7.18 (d,  $^3J_{\text{HH}} = 8.3$  Hz, 2H), 2.59-2.50 (m, 1H), 2.27-2.08 (m, 2H), 1.83-1.55 (m, 5H), 1.33-1.24 (m, 1H), 1.12 (d,  $^3J_{\text{HH}} = 6.6$  Hz, 3H), 1.11 (d,  $^3J_{\text{HH}} = 6.3$  Hz, 3H), 1.08 (d,  $^3J_{\text{HH}} = 6.6$  Hz, 3H), 1.03 (d,  $^3J_{\text{HH}} = 6.6$  Hz, 3H), 1.00-0.89 (m, 1H).  $^{13}\text{C}$  NMR ( $\text{CDCl}_3$ ):  $\delta$  140.8, 140.0 (d,  $^3J_{\text{CP}} = 2.9$  Hz), 139.3, 128.8, 127.3, 127.2, 127.0, 126.3, 39.8 (d,  $^1J_{\text{CP}} = 68.1$  Hz), 39.7 (d,  $^1J_{\text{CP}} = 67.1$  Hz), 25.1 (d,  $^3J_{\text{CP}} = 9.6$  Hz), 25.0 (d,  $^3J_{\text{CP}} = 8.6$  Hz), 24.9 (d,  $^3J_{\text{CP}} = 7.7$  Hz), 24.8 (d,  $^3J_{\text{CP}} = 7.7$  Hz), 23.7 (d,  $^2J_{\text{CP}} = 3.8$  Hz), 23.6 (d,  $^2J_{\text{CP}} = 3.8$  Hz), 19.6 (d,  $^2J_{\text{CP}} = 2.9$  Hz), 19.2 (d,  $^1J_{\text{CP}} = 87.2$  Hz), 12.0 (d,  $^2J_{\text{CP}} = 3.8$  Hz).  $^{31}\text{P}\{^1\text{H}\}$  NMR ( $\text{CDCl}_3$ ):  $\delta$  42.9 (s). HRMS (FAB) calcd for  $\text{C}_{23}\text{H}_{32}\text{OP}$  ( $\text{M}+\text{H}^+$ ) 355.2185, found 355.2191.

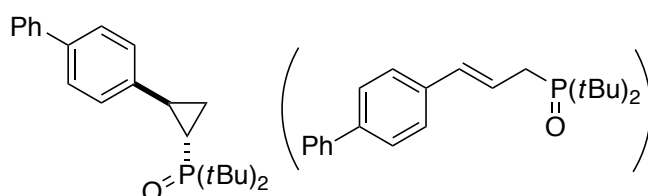

**Table 2, Entry 15 (Compound 3be).** Yellow solid. 88% yield (**3be/(4be+4be')** = 89/11, **4ja/4ja'** = 62/38).

$^1\text{H}$  NMR ( $\text{CDCl}_3$ ):  $\delta$  7.57 (d,  $^3J_{\text{HH}} = 6.9$  Hz, 2H), 7.52 (d,  $^3J_{\text{HH}} = 8.2$  Hz, 2H), 7.43 (t,  $^3J_{\text{HH}} = 7.8$  Hz, 2H), 7.33 (t,  $^3J_{\text{HH}} = 7.3$  Hz, 1H), 7.18 (d,  $^3J_{\text{HH}} = 8.2$  Hz, 2H), 2.53-2.43 (m, 1H), 1.65-1.55 (m, 1H), 1.33-1.27 (m, 1H), 1.35 (d,  $^3J_{\text{HP}} = 13.3$  Hz, 9H), 1.28 (d,  $^3J_{\text{HP}} = 13.3$  Hz, 9H), 1.14-1.02 (m, 1H).  $^{13}\text{C}\{^1\text{H}\}$  NMR ( $\text{CDCl}_3$ ):  $\delta$  140.8, 140.1 (d,  $^3J_{\text{CP}} = 1.9$  Hz), 139.2, 128.8, 127.3, 127.2, 127.0, 126.2, 36.4 (d,  $^1J_{\text{CP}} = 61.3$  Hz), 36.1 (d,  $^1J_{\text{CP}} = 62.3$  Hz), 27.2, 19.9 (d,  $^2J_{\text{CP}} = 2.9$  Hz), 13.6 (d,  $^1J_{\text{CP}} = 77.6$  Hz), 13.1 (d,  $^2J_{\text{CP}} = 4.8$  Hz).  $^{31}\text{P}\{^1\text{H}\}$  NMR ( $\text{CDCl}_3$ ):  $\delta$  57.2 (s). HRMS (FAB) calcd for  $\text{C}_{23}\text{H}_{32}\text{OP}$  ( $\text{M}+\text{H}^+$ ) 355.2185, found 355.2202.

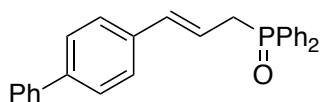

**Table 2, Entry 16 (Compound 4bf).** White solid. 80% yield (**3bf/4bf** = 0/100).

$^1\text{H}$  NMR ( $\text{CDCl}_3$ ):  $\delta$  7.87-7.73 (m, 4H), 7.63-7.45 (m, 10H), 7.42 (t,  $^3J_{\text{HH}} = 7.6$  Hz, 2H), 7.38-7.29 (m, 3H), 6.46 (dd,  $^3J_{\text{HH}} = 15.6$  Hz and  $^4J_{\text{HP}} = 4.1$  Hz, 1H), 6.23 (dtd,  $^3J_{\text{HH}} = 15.6$  and 7.6 Hz and  $^3J_{\text{HP}} = 6.0$  Hz, 1H), 3.32 (ddd,  $^2J_{\text{HP}} = 14.7$  Hz,  $^3J_{\text{HH}} = 7.3$  Hz, and  $^4J_{\text{HH}} = 1.4$  Hz, 2H).  $^{13}\text{C}\{^1\text{H}\}$  NMR ( $\text{CDCl}_3$ ):  $\delta$  140.7, 140.5, 135.9 (d,  $J_{\text{CP}} = 2.9$  Hz), 135.2 (d,  $J_{\text{CP}} = 12.5$  Hz), 132.7 (d,  $^1J_{\text{CP}} = 98.7$  Hz), 132.0 (d,  $J_{\text{CP}} = 2.9$  Hz), 131.2 (d,  $J_{\text{CP}} = 8.6$  Hz), 128.9, 128.7 (d,  $J_{\text{CP}} = 11.5$  Hz), 127.4, 127.3, 127.0, 126.8, 118.7 (d,  $^3J_{\text{CP}} = 9.6$  Hz), 35.8 (d,  $^1J_{\text{CP}} = 68.1$  Hz).  $^{31}\text{P}\{^1\text{H}\}$  NMR ( $\text{CDCl}_3$ ):  $\delta$  30.0 (s). HRMS (FAB) calcd for  $\text{C}_{27}\text{H}_{24}\text{OP}$  ( $\text{M}+\text{H}^+$ ) 395.1559, found 395.1560.

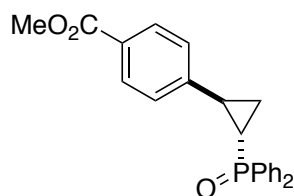

**Table 2, Entry 17 (Compound 3nf).** White solid. 76% yield (**3nf/4nf** = 100/0).

$^1\text{H}$  NMR ( $\text{CDCl}_3$ ):  $\delta$  7.94 (d,  $^3J_{\text{HH}} = 7.8$  Hz, 2H), 7.82-7.64 (m, 4H), 7.58-7.38 (m, 6H), 7.15 (d,  $^3J_{\text{HH}} = 8.2$  Hz, 2H), 3.89 (s, 3H), 2.77-2.63 (m, 1H), 1.84-1.72 (m, 1H), 1.71-1.58 (m, 1H), 1.52-1.40 (m, 1H).  $^{13}\text{C}\{^1\text{H}\}$  NMR ( $\text{CDCl}_3$ ):  $\delta$  166.8, 145.9 (d,  $^3J_{\text{CP}} = 2.9$  Hz), 133.3 (d,  $^1J_{\text{CP}} = 104$  Hz), 131.98, 131.96, 131.9, 131.09 (d,  $J_{\text{CP}} = 9.6$  Hz), 131.07 (d,  $J_{\text{CP}} = 9.6$  Hz), 130.0, 128.70 (d,  $J_{\text{CP}} = 12.5$  Hz), 128.68 (d,  $J_{\text{CP}} = 11.5$  Hz), 128.5, 126.0, 52.1, 21.0 (d,  $^2J_{\text{CP}} = 2.9$  Hz), 19.9 (d,  $^1J_{\text{CP}} = 99.7$  Hz), 12.8 (d,  $^2J_{\text{CP}} = 4.8$  Hz).  $^{31}\text{P}\{^1\text{H}\}$  NMR ( $\text{CDCl}_3$ ):  $\delta$  30.1 (s). HRMS (FAB) calcd for  $\text{C}_{23}\text{H}_{22}\text{O}_3\text{P}$  ( $\text{M}+\text{H}^+$ ) 377.1301, found 377.1307.

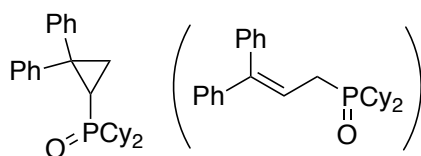

**Equation 1 (Compound 3la).** White solid. 92% yield (**3la/4la** = 85/15).

$^1\text{H}$  NMR ( $\text{CDCl}_3$ ):  $\delta$  7.36-7.28 (m, 6H), 7.25-7.19 (m, 3H), 7.15 (t,  $^3J_{\text{HH}} = 7.1$  Hz, 1H), 2.42 (ddd,  $^2J_{\text{HP}} = 14.2$  Hz and  $^3J_{\text{HH}} = 7.4$  and 4.6 Hz, 1H), 2.03-1.02 (m, 24H).  $^{13}\text{C}\{^1\text{H}\}$  NMR ( $\text{CDCl}_3$ ):  $\delta$  146.5 (d,  $^3J_{\text{CP}} = 1.9$  Hz), 139.7 (d,  $^3J_{\text{CP}} = 2.9$  Hz), 129.8, 128.9, 128.6, 127.8, 126.7, 126.6, 38.4 (d,  $^1J_{\text{CP}} = 67.1$  Hz), 37.9 (d,  $^1J_{\text{CP}} = 67.1$  Hz), 36.4 (d,  $^2J_{\text{CP}} = 4.8$  Hz), 27.0 (d,  $J_{\text{CP}} = 12.5$  Hz), 26.9 (d,  $J_{\text{CP}} = 12.5$  Hz), 26.8 (d,  $J_{\text{CP}} = 11.5$  Hz), 26.7 (d,  $J_{\text{CP}} = 2.9$  Hz), 26.6 (d,  $J_{\text{CP}} = 6.7$  Hz), 26.4 (d,  $J_{\text{CP}} = 1.9$  Hz), 26.23 (d,  $J_{\text{CP}} = 1.9$  Hz), 26.21 (d,  $J_{\text{CP}} = 1.9$  Hz), 26.1 (d,  $J_{\text{CP}} = 1.9$  Hz), 26.0 (d,  $J_{\text{CP}} = 2.9$  Hz), 19.1 (d,  $^1J_{\text{CP}} = 81.5$  Hz), 16.6 (d,  $^2J_{\text{CP}} = 3.8$  Hz).  $^{31}\text{P}\{^1\text{H}\}$  NMR ( $\text{CDCl}_3$ ):  $\delta$  47.0 (s). HRMS (FAB) calcd for  $\text{C}_{27}\text{H}_{36}\text{OP}$

(M+H<sup>+</sup>) 407.2498, found 407.2506.

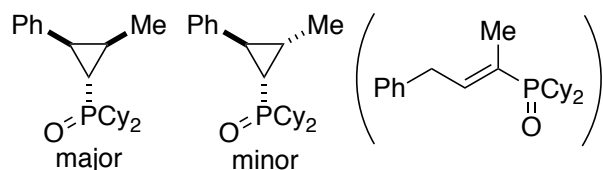

**Equation 2 (Compound 3ma).** White solid. 94% yield (**3ma/4ma'** = 97/3, dr = 87/13 for **3ma**). The relative configurations were assigned by coupling constants in <sup>1</sup>H NMR as well as HMQC data.

Major diastereomer: <sup>1</sup>H NMR (CDCl<sub>3</sub>): δ 7.31 (t, <sup>3</sup>J<sub>HH</sub> = 7.3 Hz, 2H), 7.25-7.20 (m, 1H), 7.20-7.15 (m, 2H), 2.66 (ddd, <sup>3</sup>J<sub>HP</sub> = 11.4 Hz and <sup>3</sup>J<sub>HH</sub> = 9.2 and 6.4 Hz, 1H), 2.09-1.04 (m, 23H), 0.90 (d, <sup>3</sup>J<sub>HH</sub> = 6.4 Hz, 3H), 0.74 (dt, <sup>2</sup>J<sub>HP</sub> = 14.2 Hz and <sup>3</sup>J<sub>HH</sub> = 6.2 Hz, 1H). <sup>13</sup>C{<sup>1</sup>H} NMR (CDCl<sub>3</sub>): δ 136.9 (d, <sup>3</sup>J<sub>CP</sub> = 1.9 Hz), 129.0, 128.2, 126.3, 36.7 (d, <sup>1</sup>J<sub>CP</sub> = 67.1 Hz), 36.5 (d, <sup>1</sup>J<sub>CP</sub> = 68.0 Hz), 26.73 (d, J<sub>CP</sub> = 12.5 Hz), 26.69 (d, J<sub>CP</sub> = 12.4 Hz), 26.61 (d, J<sub>CP</sub> = 11.5 Hz), 26.57 (d, J<sub>CP</sub> = 10.5 Hz), 26.134 (d, J<sub>CP</sub> = 4.8 Hz), 26.130, 26.10 (d, J<sub>CP</sub> = 1.9 Hz), 26.08 (d, J<sub>CP</sub> = 2.9 Hz), 25.34 (d, J<sub>CP</sub> = 3.8 Hz), 25.27 (d, J<sub>CP</sub> = 3.8 Hz), 24.7 (d, <sup>3</sup>J<sub>CP</sub> = 3.8 Hz), 16.3 (d, <sup>2</sup>J<sub>CP</sub> = 4.8 Hz), 14.6 (d, <sup>1</sup>J<sub>CP</sub> = 85.3 Hz) 12.6 (d, <sup>2</sup>J<sub>CP</sub> = 2.9 Hz). <sup>31</sup>P{<sup>1</sup>H} NMR (CDCl<sub>3</sub>): δ 48.9 (s). HRMS (FAB) calcd for C<sub>22</sub>H<sub>34</sub>OP (M+H<sup>+</sup>) 345.2342, found 345.2355.

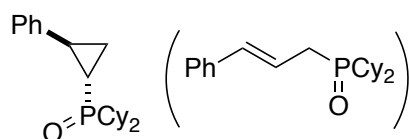

**Equation 3, using substrate 5.** White solid. 77% yield (**3aa/4aa** = 99/1).

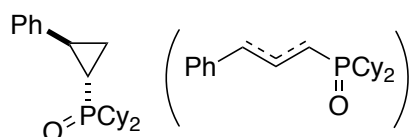

**Equation 3, using substrate 6.** The reaction was conducted at 40 °C. White solid. 71% yield (**3aa/(4aa+4aa')** = 90/10, **4aa/4aa'** = 71/29).

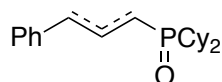

**Equation 3, using substrate 7.** 61% <sup>1</sup>H NMR yield (**3aa/(4aa+4aa')** = 0/100, **4aa/4aa'** = 92/8).

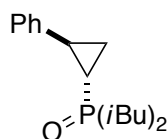

**Scheme 2a (Compound *trans*-3ad).** White solid. 82% yield (**3ad/4ad** = 100/0).

<sup>1</sup>H NMR (CDCl<sub>3</sub>): δ 7.28 (t, <sup>3</sup>J<sub>HH</sub> = 7.5 Hz, 2H), 7.20 (tt, <sup>3</sup>J<sub>HH</sub> = 7.4 Hz and <sup>4</sup>J<sub>HH</sub> = 1.7 Hz, 1H),

7.13-7.09 (m, 2H), 2.49 (ddt,  $^3J_{HP} = 12.4$  Hz,  $^3J_{HH} = 8.8$  Hz and 5.6 Hz, 1H), 2.25-2.06 (m, 2H), 1.80-1.61 (m, 4H), 1.60-1.52 (m, 1H), 1.28-1.21 (m, 1H), 1.11 (d,  $^3J_{HH} = 6.6$  Hz, 3H), 1.10 (d,  $^3J_{HH} = 6.5$  Hz, 3H), 1.06 (d,  $^3J_{HH} = 6.6$  Hz, 3H), 1.01 (d,  $^3J_{HH} = 6.8$  Hz, 3H), 0.94-0.86 (m, 1H).  $^{13}\text{C}\{^1\text{H}\}$  NMR ( $\text{CDCl}_3$ ):  $\delta$  140.8 (d,  $^3J_{CP} = 1.9$  Hz), 128.6, 126.3, 125.9, 39.8 (d,  $^1J_{CP} = 68.1$  Hz), 39.7 (d,  $^1J_{CP} = 66.1$  Hz), 25.0 (d,  $^3J_{CP} = 9.6$  Hz, 2C), 24.9 (d,  $^3J_{CP} = 7.7$  Hz), 24.7 (d,  $^3J_{CP} = 7.7$  Hz), 23.7 (d,  $^2J_{CP} = 3.8$  Hz), 23.6 (d,  $^2J_{CP} = 4.8$  Hz), 19.8 (d,  $^2J_{CP} = 3.8$  Hz), 19.0 (d,  $^1J_{CP} = 88.2$  Hz), 11.9 (d,  $^2J_{CP} = 4.8$  Hz).  $^{31}\text{P}\{^1\text{H}\}$  NMR ( $\text{CDCl}_3$ ):  $\delta$  43.0 (s). HRMS (FAB) calcd for  $\text{C}_{17}\text{H}_{28}\text{OP}$  ( $\text{M}+\text{H}^+$ ) 279.1872, found 279.1878.

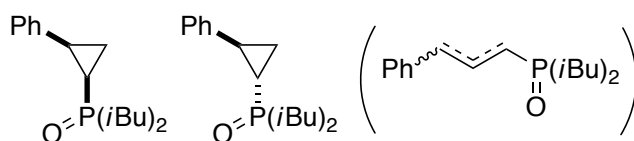

**Scheme 2b (Compound *trans/cis*-3ad).** Colorless oil. 82% yield (**3ad**/(**4ad**+**4ad'**) = 91/9, *trans/cis* = 33/67 for **3ad**, *E/Z* = 44/56 for **4ad**, **4ad**/**4ad'** = 94/6). Pure *cis*-**3ad** for analysis was obtained by GPC with  $\text{CHCl}_3$ .

*cis*-**3ad**:  $^1\text{H}$  NMR ( $\text{CDCl}_3$ ):  $\delta$  7.38 (d,  $^3J_{HH} = 7.3$  Hz, 2H), 7.30-7.25 (m, 2H), 7.19 (tt,  $^3J_{HH} = 7.4$  Hz and  $^4J_{HH} = 1.2$  Hz, 1H), 2.52-2.43 (m, 1H), 2.23-2.11 (m, 1H), 1.89-1.75 (m, 2H), 1.65-1.56 (m, 1H), 1.48 (ddd,  $^2J_{HH} = 15.1$  Hz,  $^2J_{HP} = 10.0$  Hz, and  $^3J_{HH} = 7.0$  Hz, 1H), 1.45-1.37 (m, 1H), 1.33 (td,  $^2J = 14.6$  Hz and  $^3J_{HH} = 6.8$  Hz, 1H), 1.14 (ddd,  $^2J_{HH} = 15.1$  Hz,  $^2J_{HP} = 12.4$  Hz, and  $^3J_{HH} = 6.3$  Hz, 1H), 1.10-0.99 (m, 1H), 1.06 (d,  $^3J_{HH} = 6.6$  Hz, 6H), 0.85 (d,  $^3J_{HH} = 6.6$  Hz, 3H), 0.83 (d,  $^3J_{HH} = 6.6$  Hz, 3H).  $^{13}\text{C}\{^1\text{H}\}$  NMR ( $\text{CDCl}_3$ ):  $\delta$  136.8 (d,  $^3J_{CP} = 4.8$  Hz), 129.2, 128.0, 126.6, 40.4 (d,  $^1J_{CP} = 67.1$  Hz), 38.7 (d,  $^1J_{CP} = 67.1$  Hz), 25.0 (d,  $^3J_{CP} = 8.6$  Hz), 24.80 (d,  $^3J_{CP} = 9.6$  Hz), 24.76 (d,  $^3J_{CP} = 7.7$  Hz), 24.6 (d,  $^3J_{CP} = 8.6$  Hz), 23.6 (d,  $^2J_{CP} = 4.8$  Hz), 23.5 (d,  $^2J_{CP} = 3.8$  Hz), 23.3 (d,  $^2J_{CP} = 4.8$  Hz), 18.0 (d,  $^1J_{CP} = 89.1$  Hz), 8.6 (d,  $^2J_{CP} = 3.8$  Hz).  $^{31}\text{P}\{^1\text{H}\}$  NMR ( $\text{CDCl}_3$ ):  $\delta$  43.6 (s). HRMS (FAB) calcd for  $\text{C}_{17}\text{H}_{28}\text{OP}$  ( $\text{M}+\text{H}^+$ ) 279.1872, found 279.1873.

### Comparison between Silicon and Phosphorus Nucleophiles.

Previously, we reported a related cyclopropanation reaction of allyl phosphates using a silicon nucleophile derived from a silylboronate and  $\text{KN}(\text{SiMe}_3)_2$ , and we proposed that the effective nucleophile would be a silylpotassium species.<sup>2</sup> To make a direct comparison with the present reaction using lithium phosphides, we conducted a reaction of cinnamyl phosphate **1a** with  $\text{LiSiMe}_2\text{Ph}$  in THF at 0 °C in the absence of HMPA (eqn (S1)). As a result, cyclopropanation product **S1** was selectively obtained along with a small amount of allylic substitution product **S2** in 64% combined yield in the ratio of 97/3. By comparing this result with the ones obtained in Table 1, entries 5, 6, and 8, a silyllithium is considered to be more nucleophilic than a lithium phosphide, and HMPA presumably coordinates to lithium to increase the nucleophilicity of the phosphide in the present reaction.

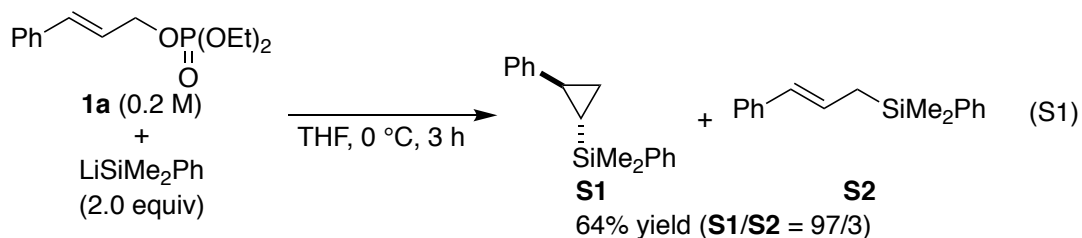

Lithium (38.7 mg, 0.990 mmol; cut in small pieces) was added to a solution of 1,2-diphenyltetramethyldisilane (163 mg, 0.603 mmol) in THF (2.0 mL) at  $-5\text{ }^\circ\text{C}$ . The mixture was sonicated for 30 min at  $0\text{ }^\circ\text{C}$  and further stirred for 15 h at  $-5\text{ }^\circ\text{C}$  to generate a solution of dimethylphenylsilyllithium. One half of this solution was taken and diluted with THF (0.5 mL). Compound **1a** (81.8 mg, 0.303 mmol) was then added to it at  $0\text{ }^\circ\text{C}$ , and the reaction mixture was stirred for 3 h at  $0\text{ }^\circ\text{C}$ . After dilution with  $\text{Et}_2\text{O}$ , the mixture was passed through a pad of silica gel with  $\text{EtOAc}$ , and the solvent was removed under vacuum. The residue was purified by silica gel preparative TLC with hexane to afford compounds **S1/S2** as a colorless oil (48.6 mg, 0.193 mmol; 64% yield, **S1/S2** = 97/3).

**S1**:  $^1\text{H NMR}$  ( $\text{CDCl}_3$ ):  $\delta$  7.61-7.53 (m, 2H), 7.40-7.33 (m, 3H), 7.28-7.22 (m, 2H), 7.17-7.07 (m, 3H), 1.84 (ddd,  $^3J_{\text{HH}} = 7.3, 6.4, \text{ and } 4.6\text{ Hz}$ , 1H), 1.06 (ddd,  $^3J_{\text{HH}} = 10.1 \text{ and } 4.6\text{ Hz}$  and  $^2J_{\text{HH}} = 3.6\text{ Hz}$ , 1H), 0.94 (td,  $^3J_{\text{HH}} = 7.6\text{ Hz}$  and  $^2J_{\text{HH}} = 3.6\text{ Hz}$ , 1H), 0.29 (s, 3H), 0.28 (s, 3H), 0.31-0.23 (m, 1H).  $^{13}\text{C}\{^1\text{H}\}$  NMR ( $\text{CDCl}_3$ ):  $\delta$  144.2, 138.7, 134.0, 129.2, 128.4, 127.9, 125.8, 125.6, 20.1, 13.1, 9.5,  $-3.5, -3.7$ .

## IV. X-ray Crystal Structure

### Compound 3ca

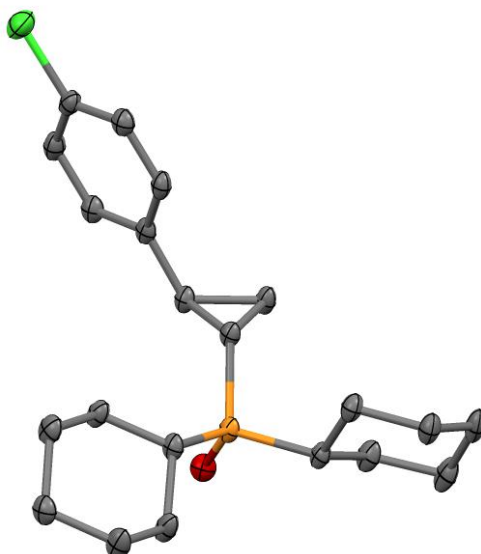

A colorless toluene/hexane solution of compound **3ca** was prepared. Crystals suitable for X-ray analysis were obtained by slow evaporation of the solvents at room temperature. The crystal structure has been deposited at the Cambridge Crystallographic Data Centre (deposition number: CCDC 2016109). The data can be obtained free of charge via the Internet at [www.ccdc.cam.ac.uk/conts/retrieving.html](http://www.ccdc.cam.ac.uk/conts/retrieving.html).

### Crystal Data and Structure Refinement.

|                      |                                      |                 |
|----------------------|--------------------------------------|-----------------|
| Empirical Formula    | C <sub>21</sub> H <sub>30</sub> ClOP |                 |
| Formula Weight       | 364.87                               |                 |
| Temperature          | 113 ± 2 K                            |                 |
| Wavelength           | 0.71075 Å                            |                 |
| Crystal System       | Trilinic                             |                 |
| Space Group          | P-1                                  |                 |
| Unit Cell Dimensions | a = 5.7668(15) Å                     | α = 95.169(6)°  |
|                      | b = 11.743(3) Å                      | β = 90.067(6)°  |
|                      | c = 28.998(7) Å                      | γ = 102.805(7)° |

|                                   |                                                 |
|-----------------------------------|-------------------------------------------------|
| Volume                            | 1906.7(8) Å <sup>3</sup>                        |
| Z Value                           | 4                                               |
| Calculated Density                | 1.271 g/cm <sup>3</sup>                         |
| Absorption coefficient            | 0.290 mm <sup>-1</sup>                          |
| F(000)                            | 784                                             |
| Crystal size                      | 0.300 x 0.250 x 0.200 mm                        |
| Theta Range for Data Collection   | 3.197–27.590°                                   |
| Index Ranges                      | -7 ≤ h ≤ 7, -15 ≤ k ≤ 15, -37 ≤ l ≤ 37          |
| Reflections Collected             | 31173                                           |
| Independent Reflections           | 8342 [R(int) = 0.0822]                          |
| Completeness to Theta = 25.242°   | 96.0%                                           |
| Absorption Correction             | Semi-empirical from equivalents                 |
| Max. and Min. Transmission        | 1.000 and 0.667                                 |
| Refinement Method                 | Full-matrix least-squares on F <sup>2</sup>     |
| Data / Restraints / Parameters    | 8342 / 0 / 433                                  |
| Goodness-of-Fit on F <sup>2</sup> | 1.008                                           |
| Final R Indices [I > 2σ(I)]       | R1 = 0.0623, wR2 = 0.1669                       |
| R Indices (All Data)              | R1 = 0.0731, wR2 = 0.1708                       |
| Largest Diff. Peak and Hole       | 1.411 and -0.511 e <sup>-</sup> /Å <sup>3</sup> |

# V. <sup>1</sup>H and <sup>13</sup>C NMR Spectra

compound **1k**

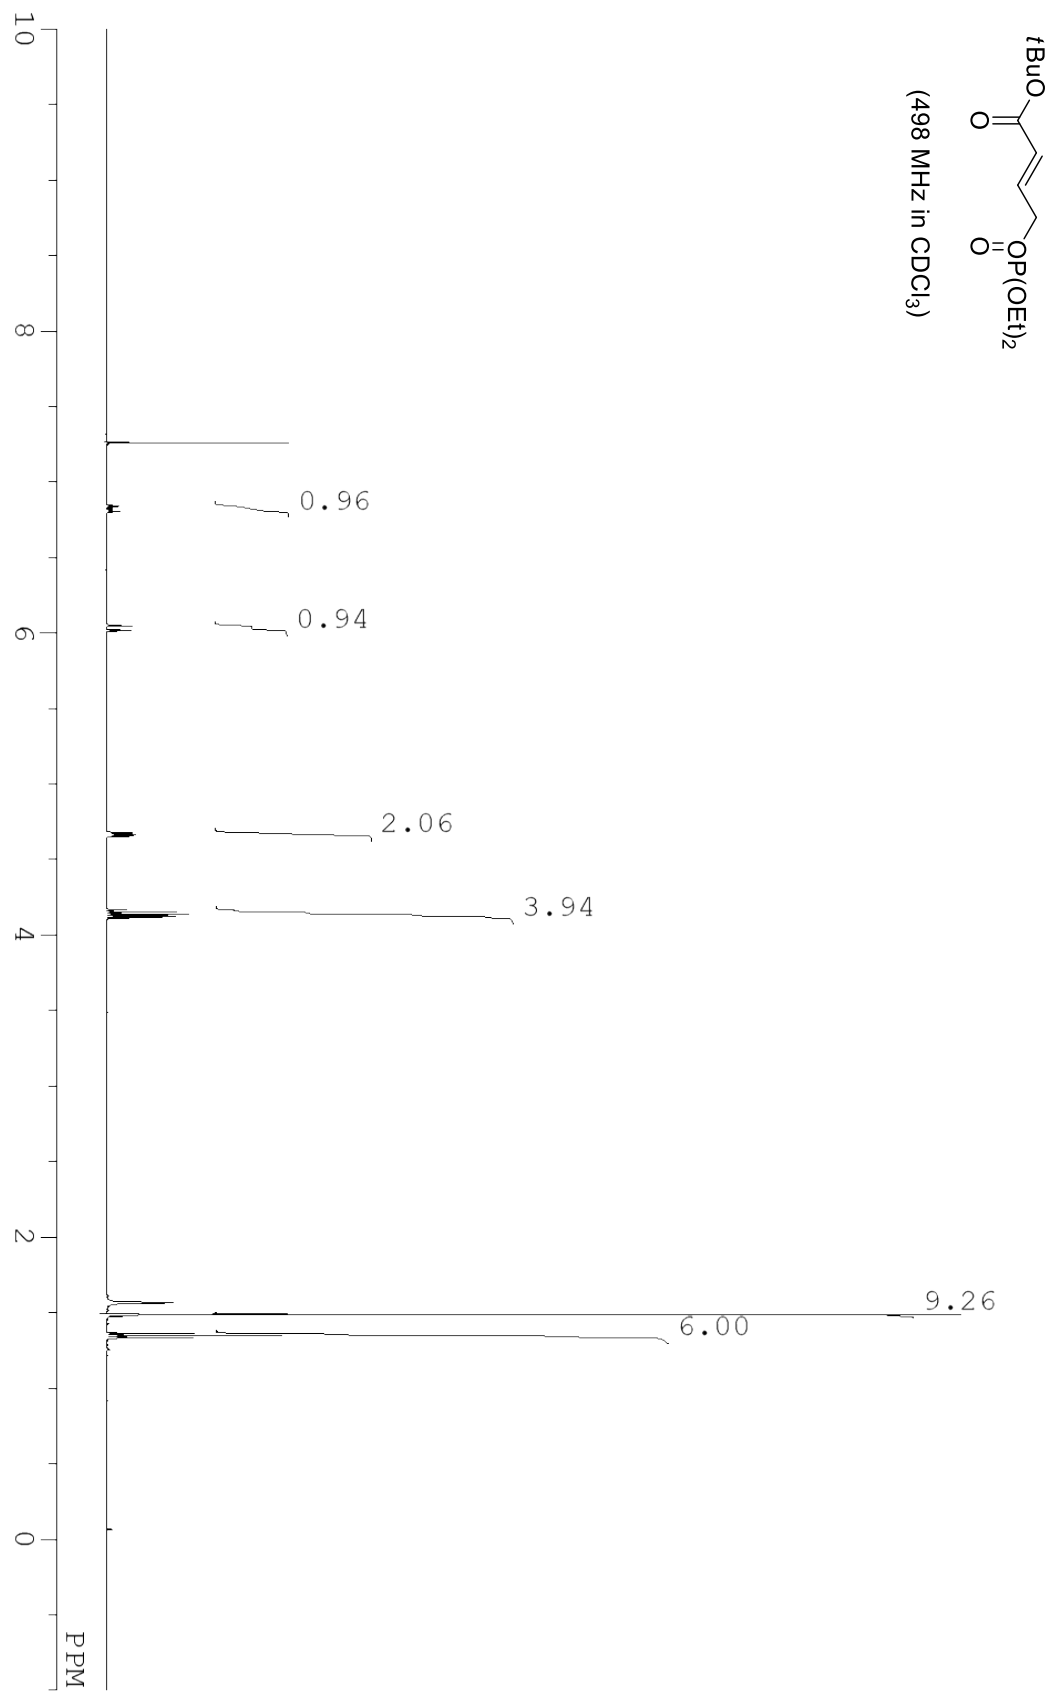



compound 1k

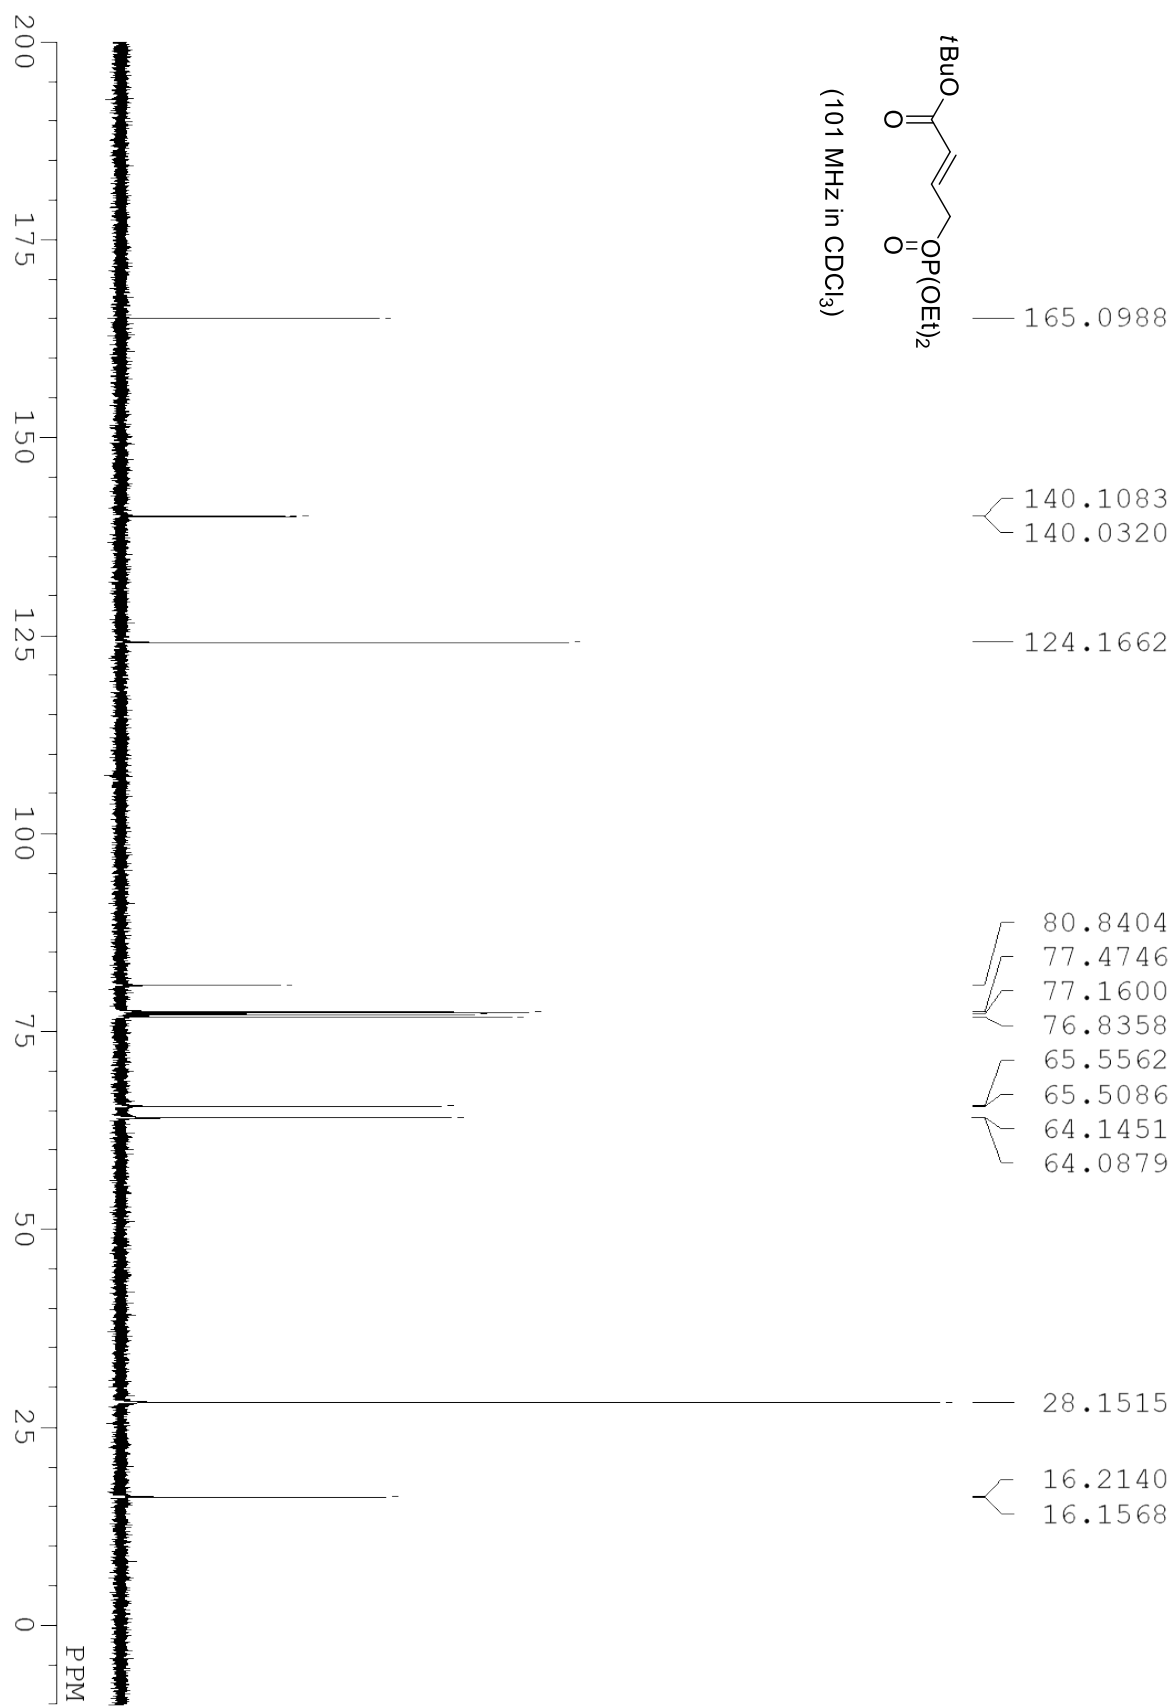

compound **1m**

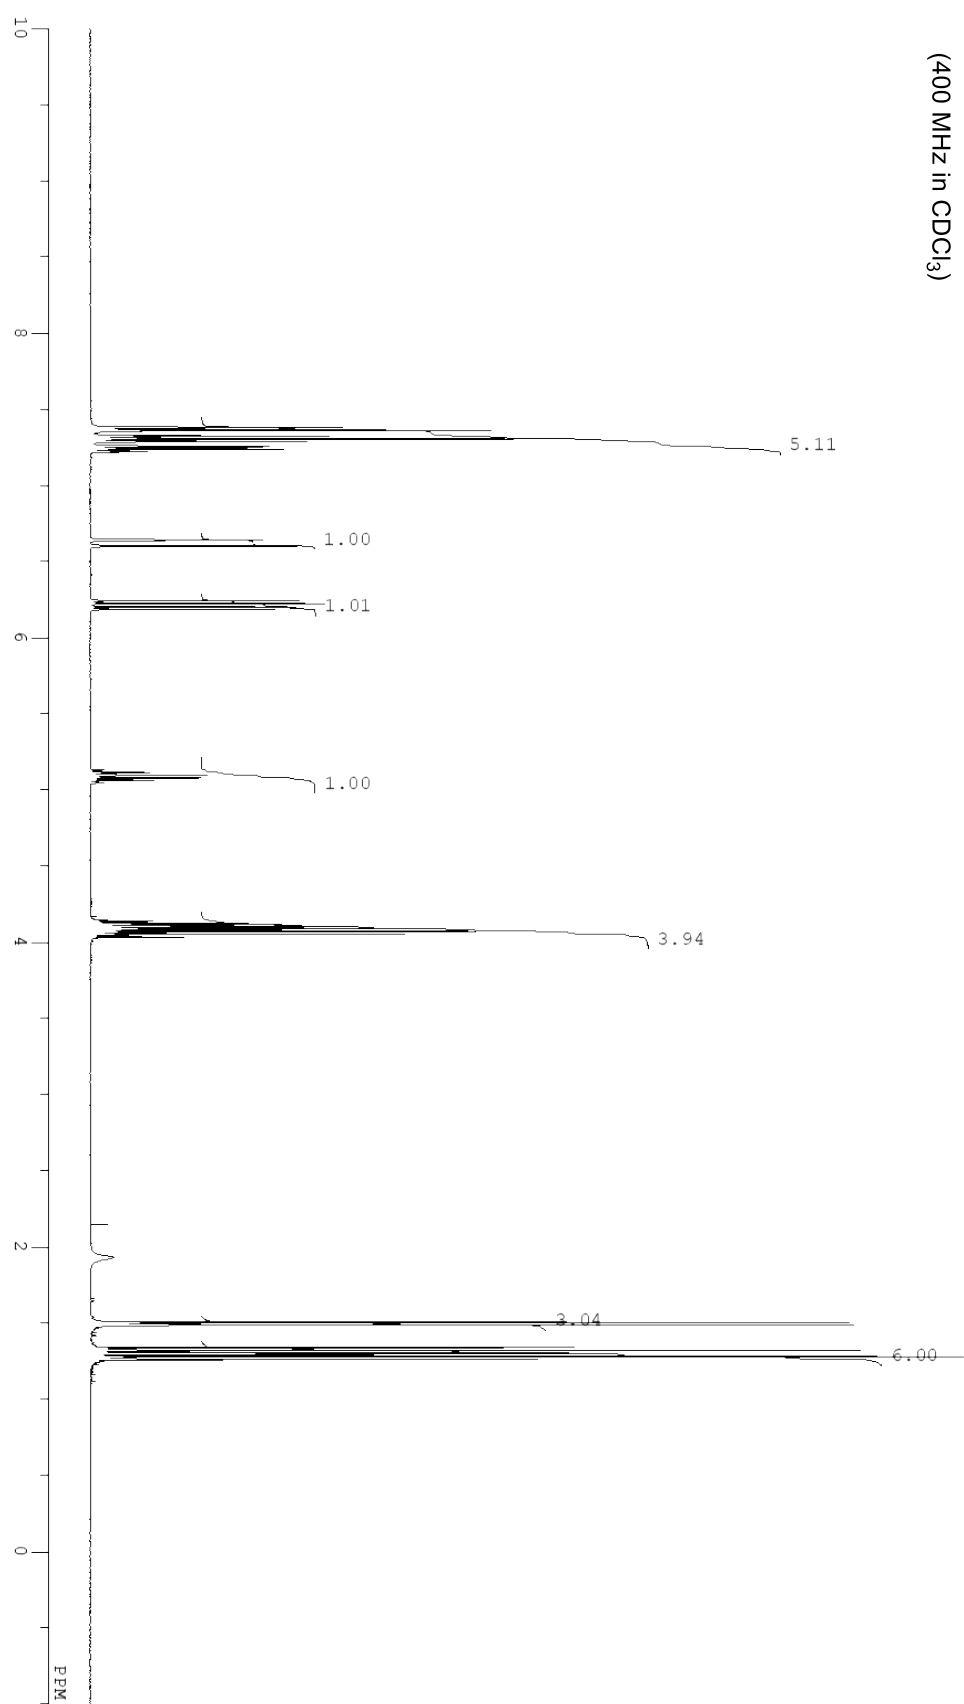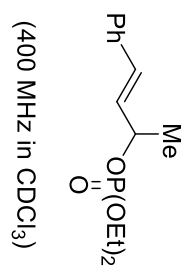

compound 1m

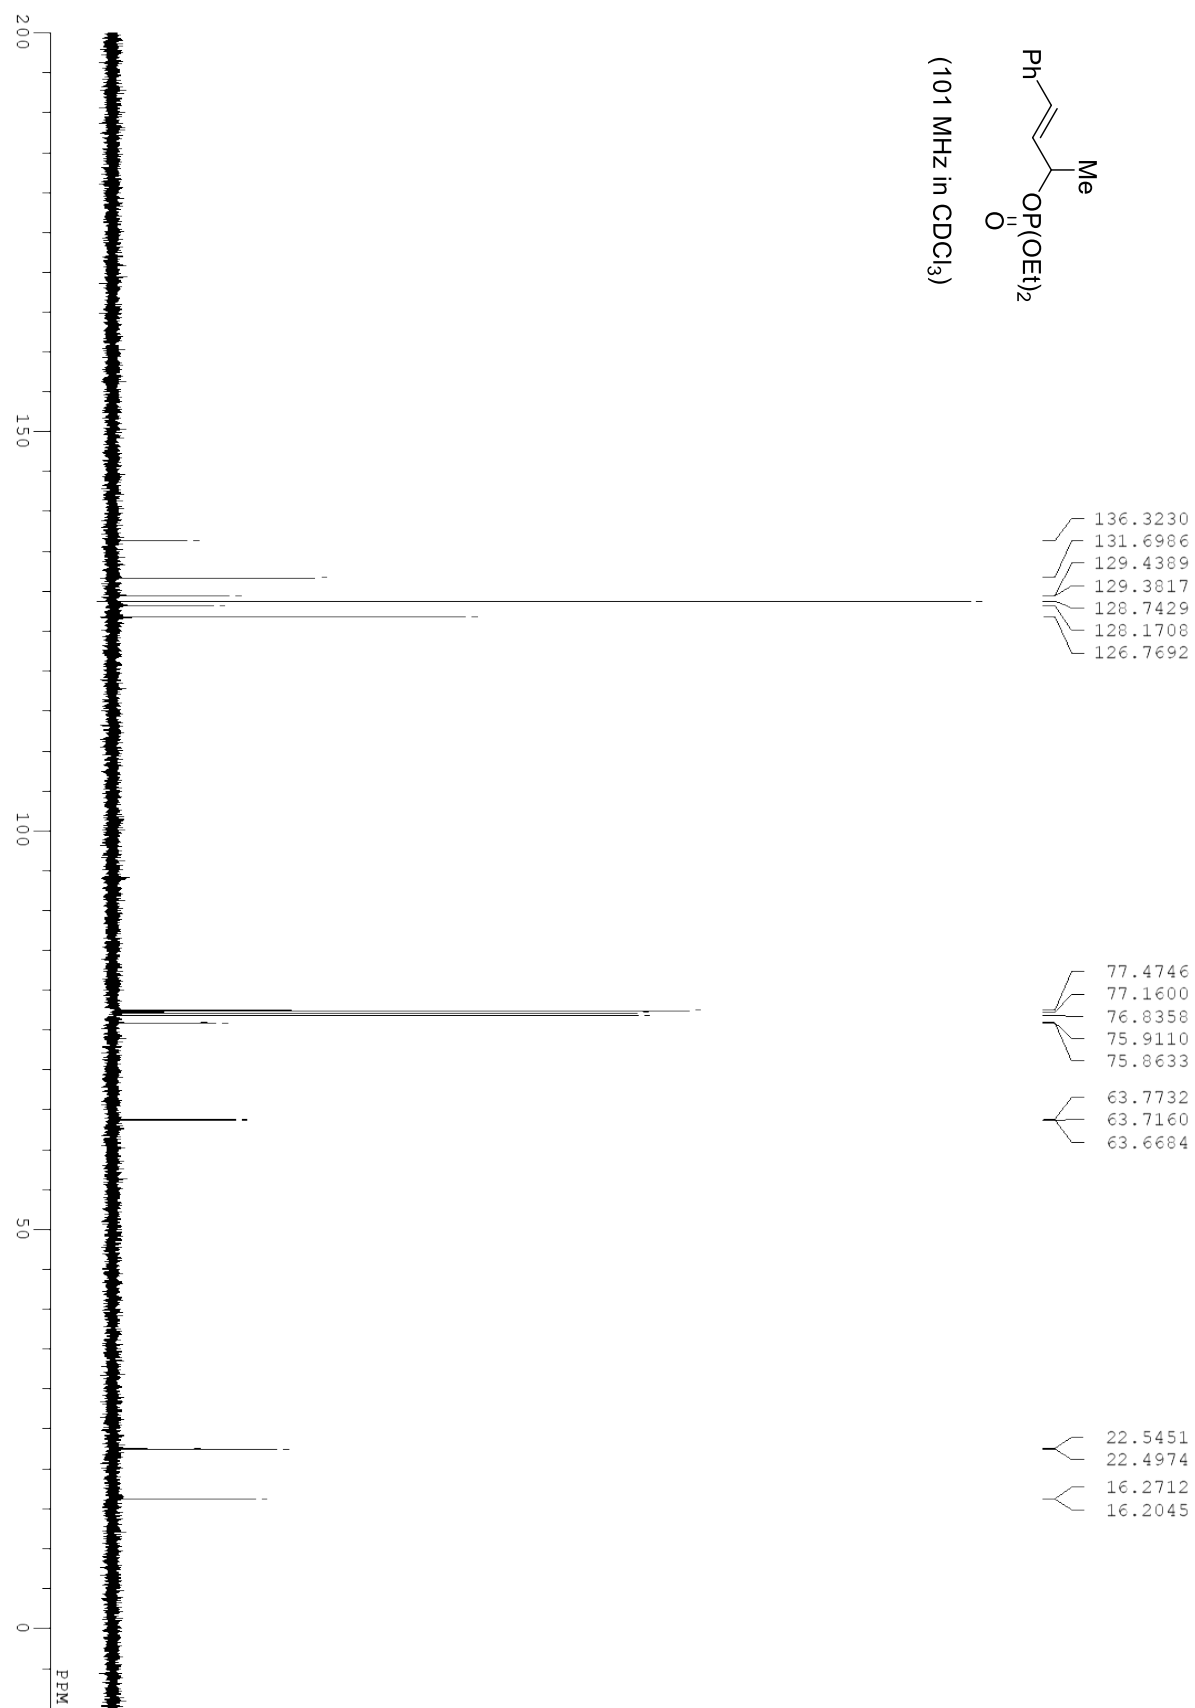

compound **4aa** (**3aa**)

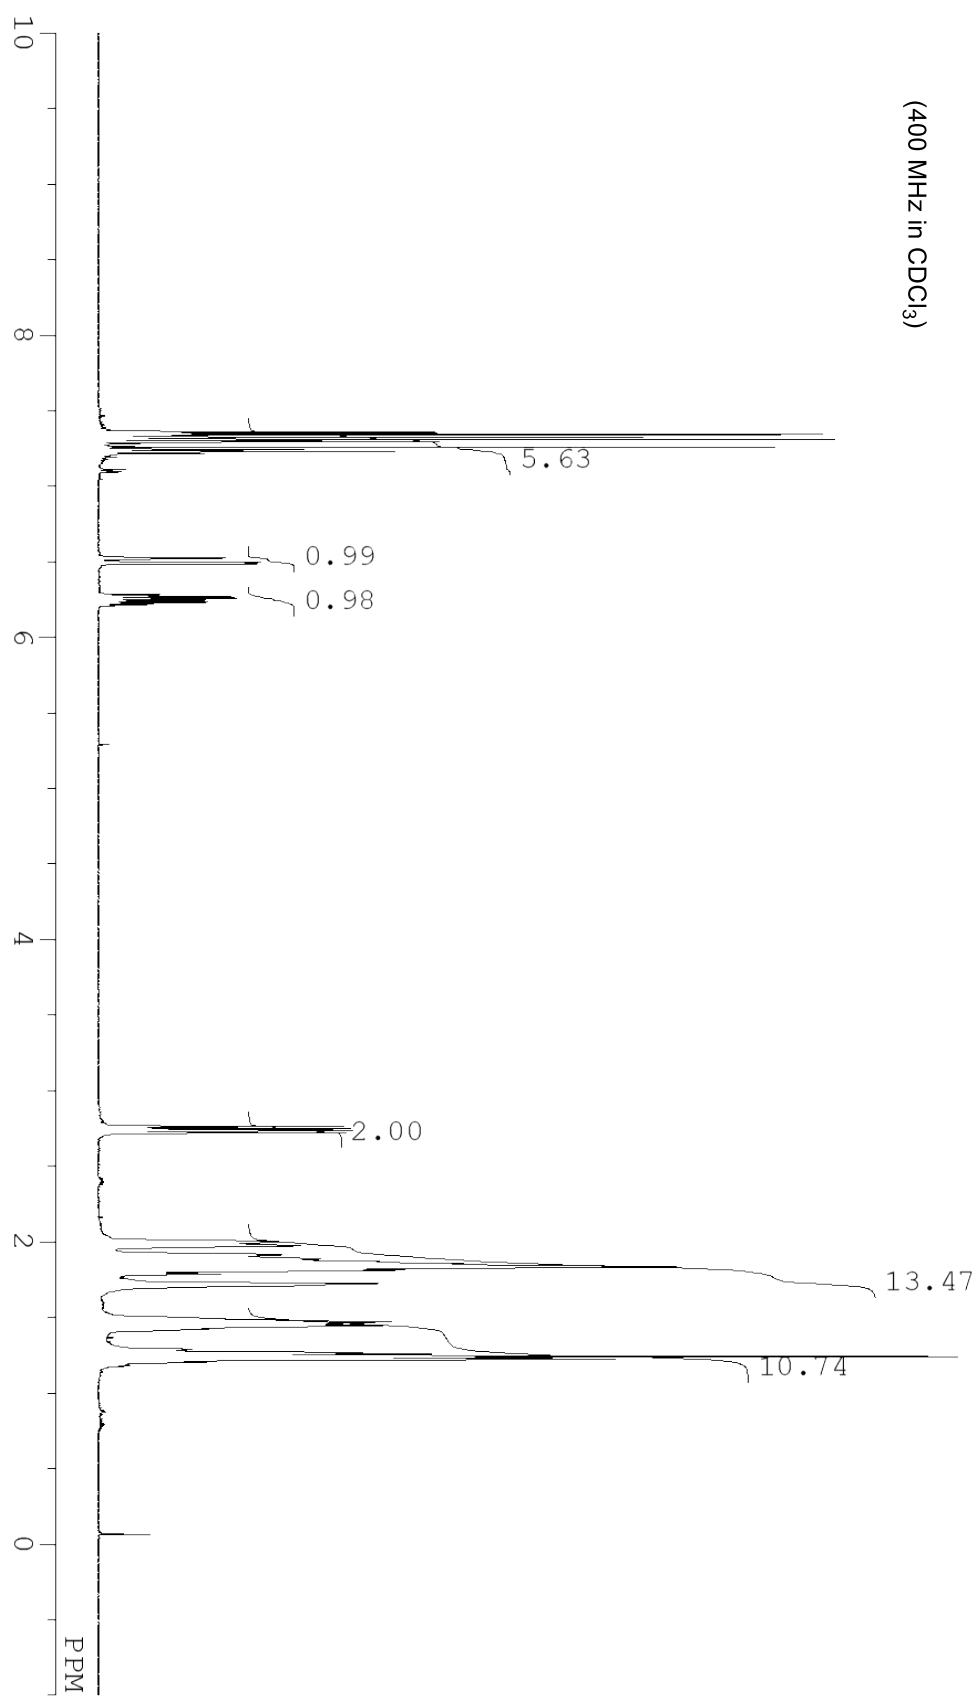

(400 MHz in CDCl<sub>3</sub>)

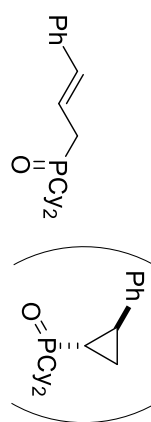

compound 4aa (3aa)

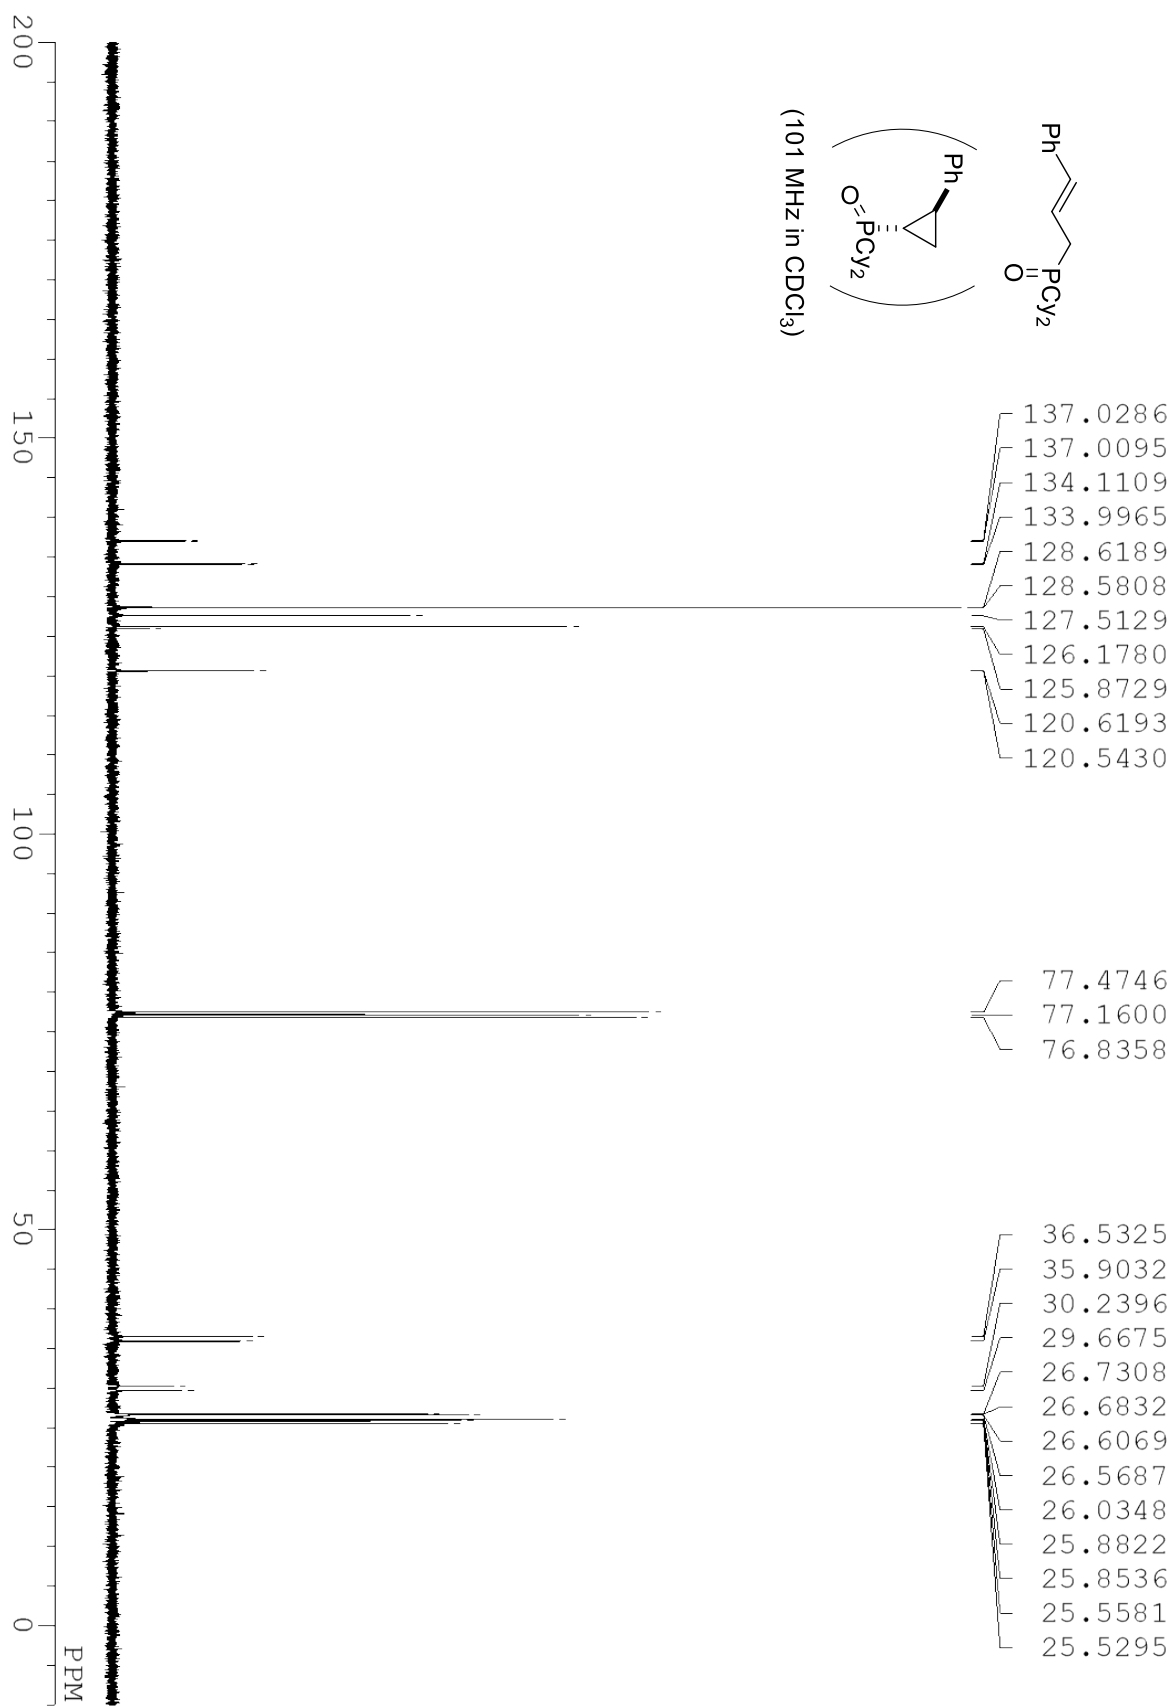

compound **3aa** (**4aa**)

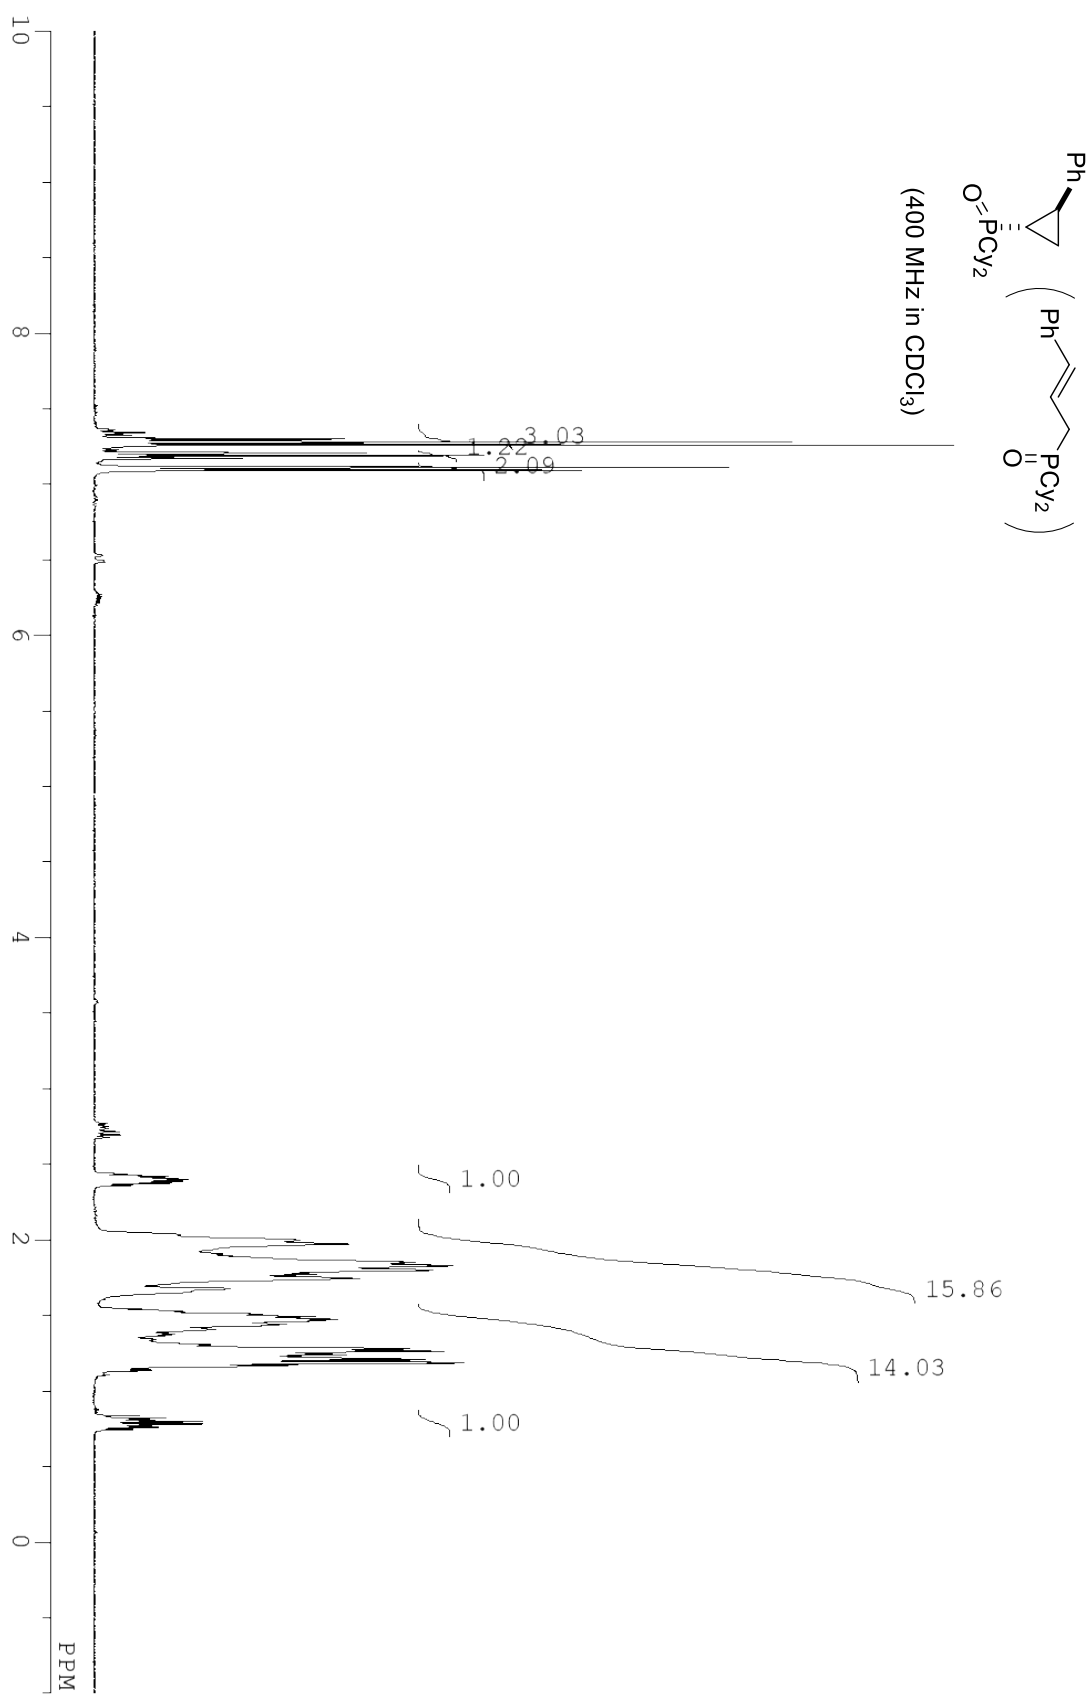

compound 3aa (4aa)

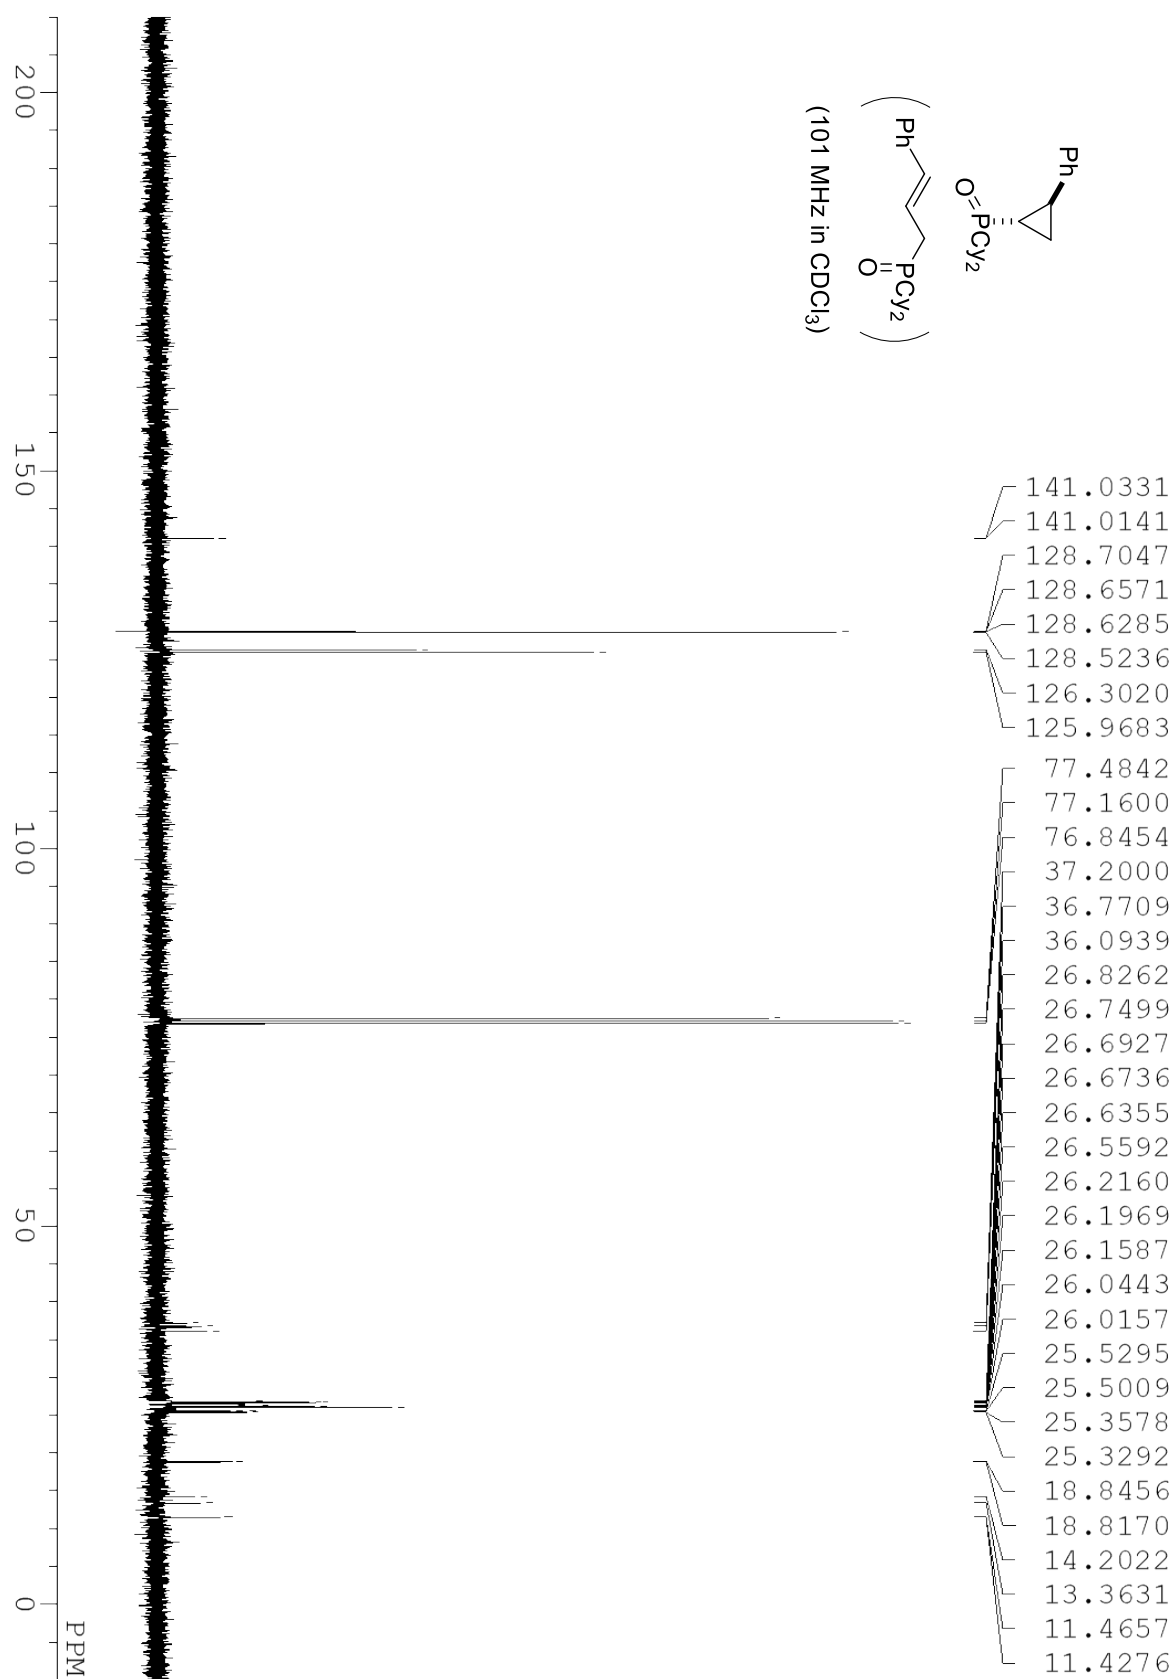

compound **3ba** (**4ba**)

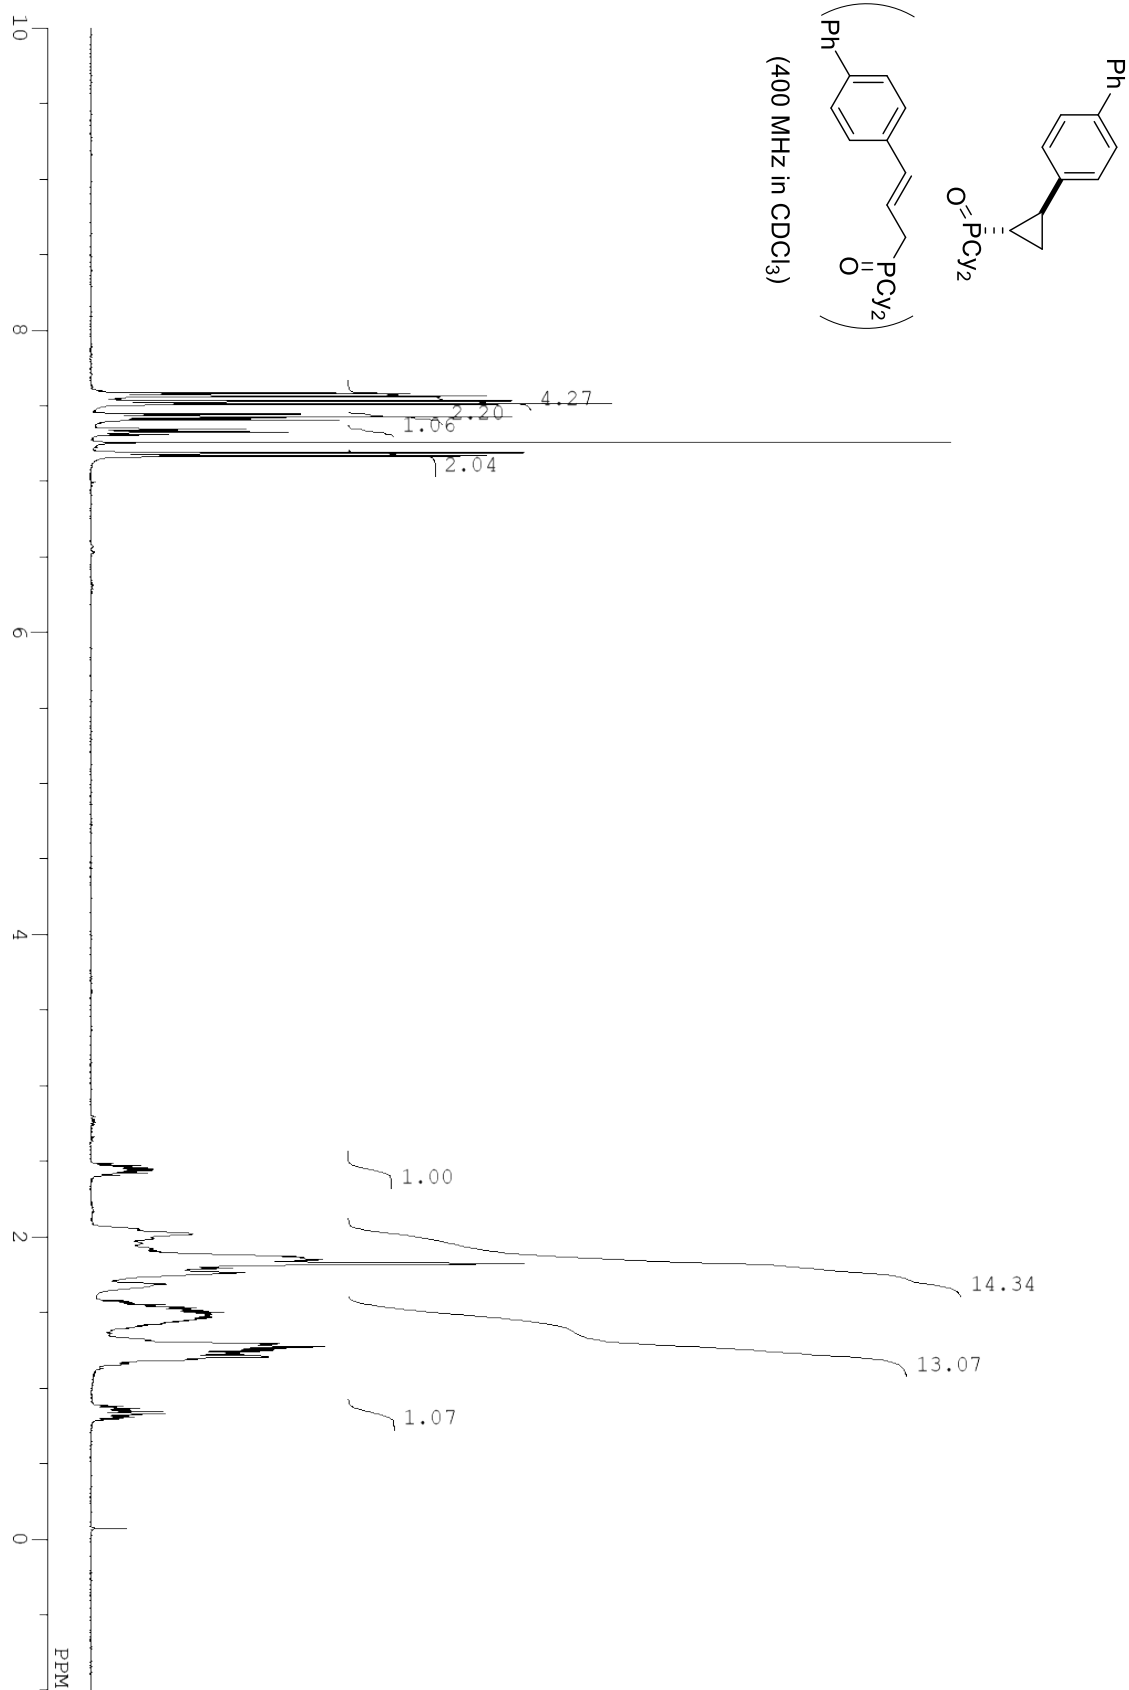



compound 3ba (4ba)

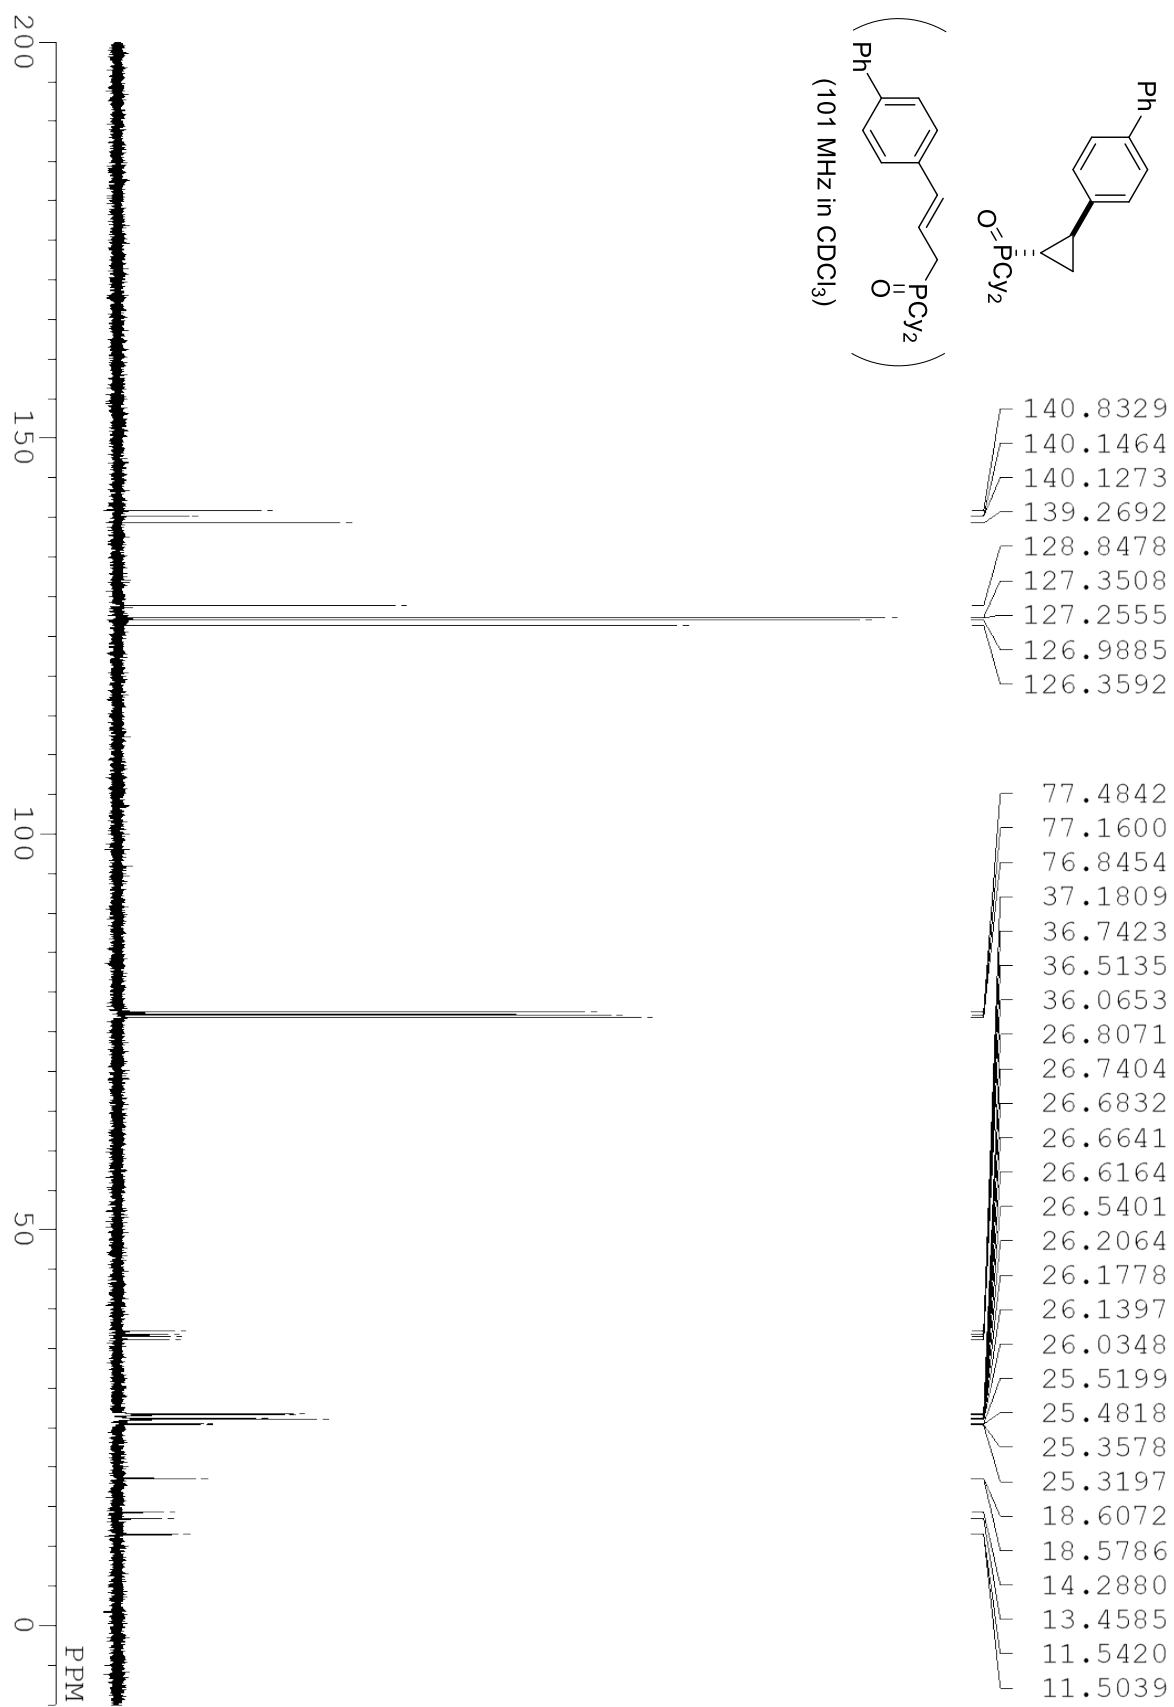

compound **3ca** (**4ca**)

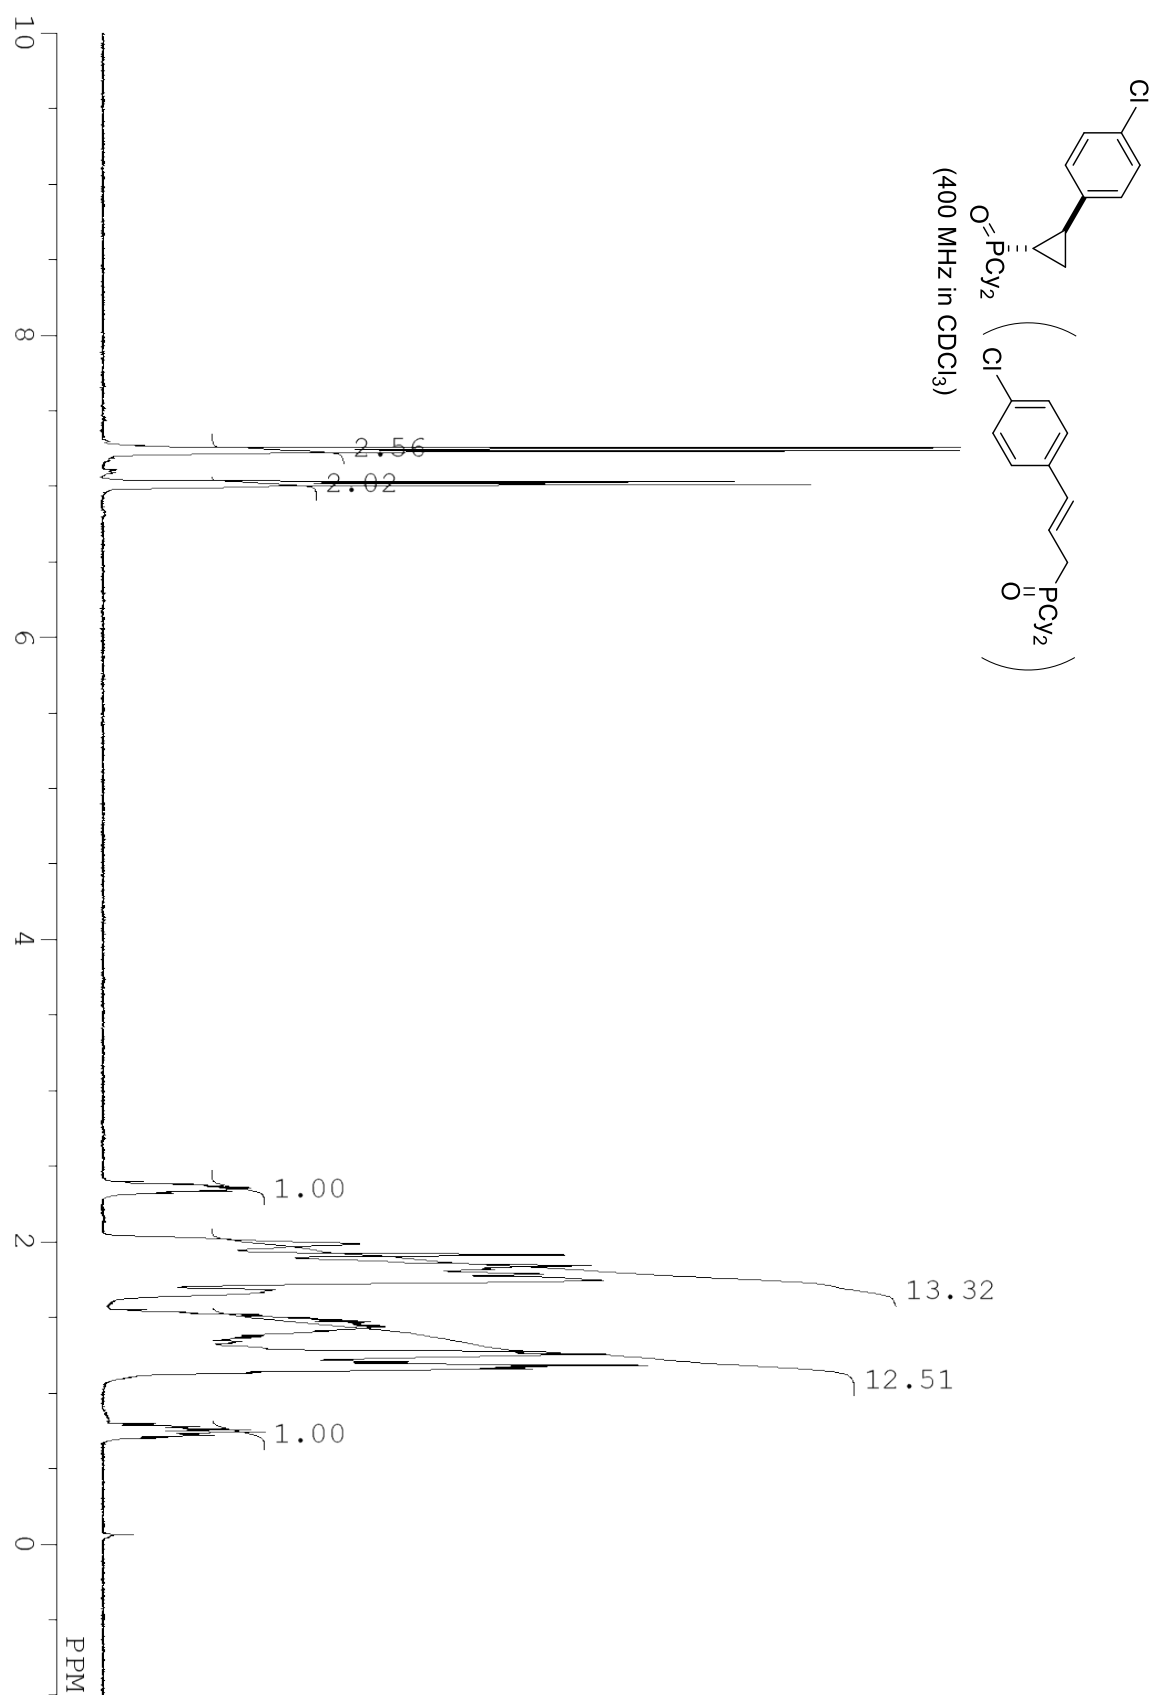

compound 3ca (4ca)

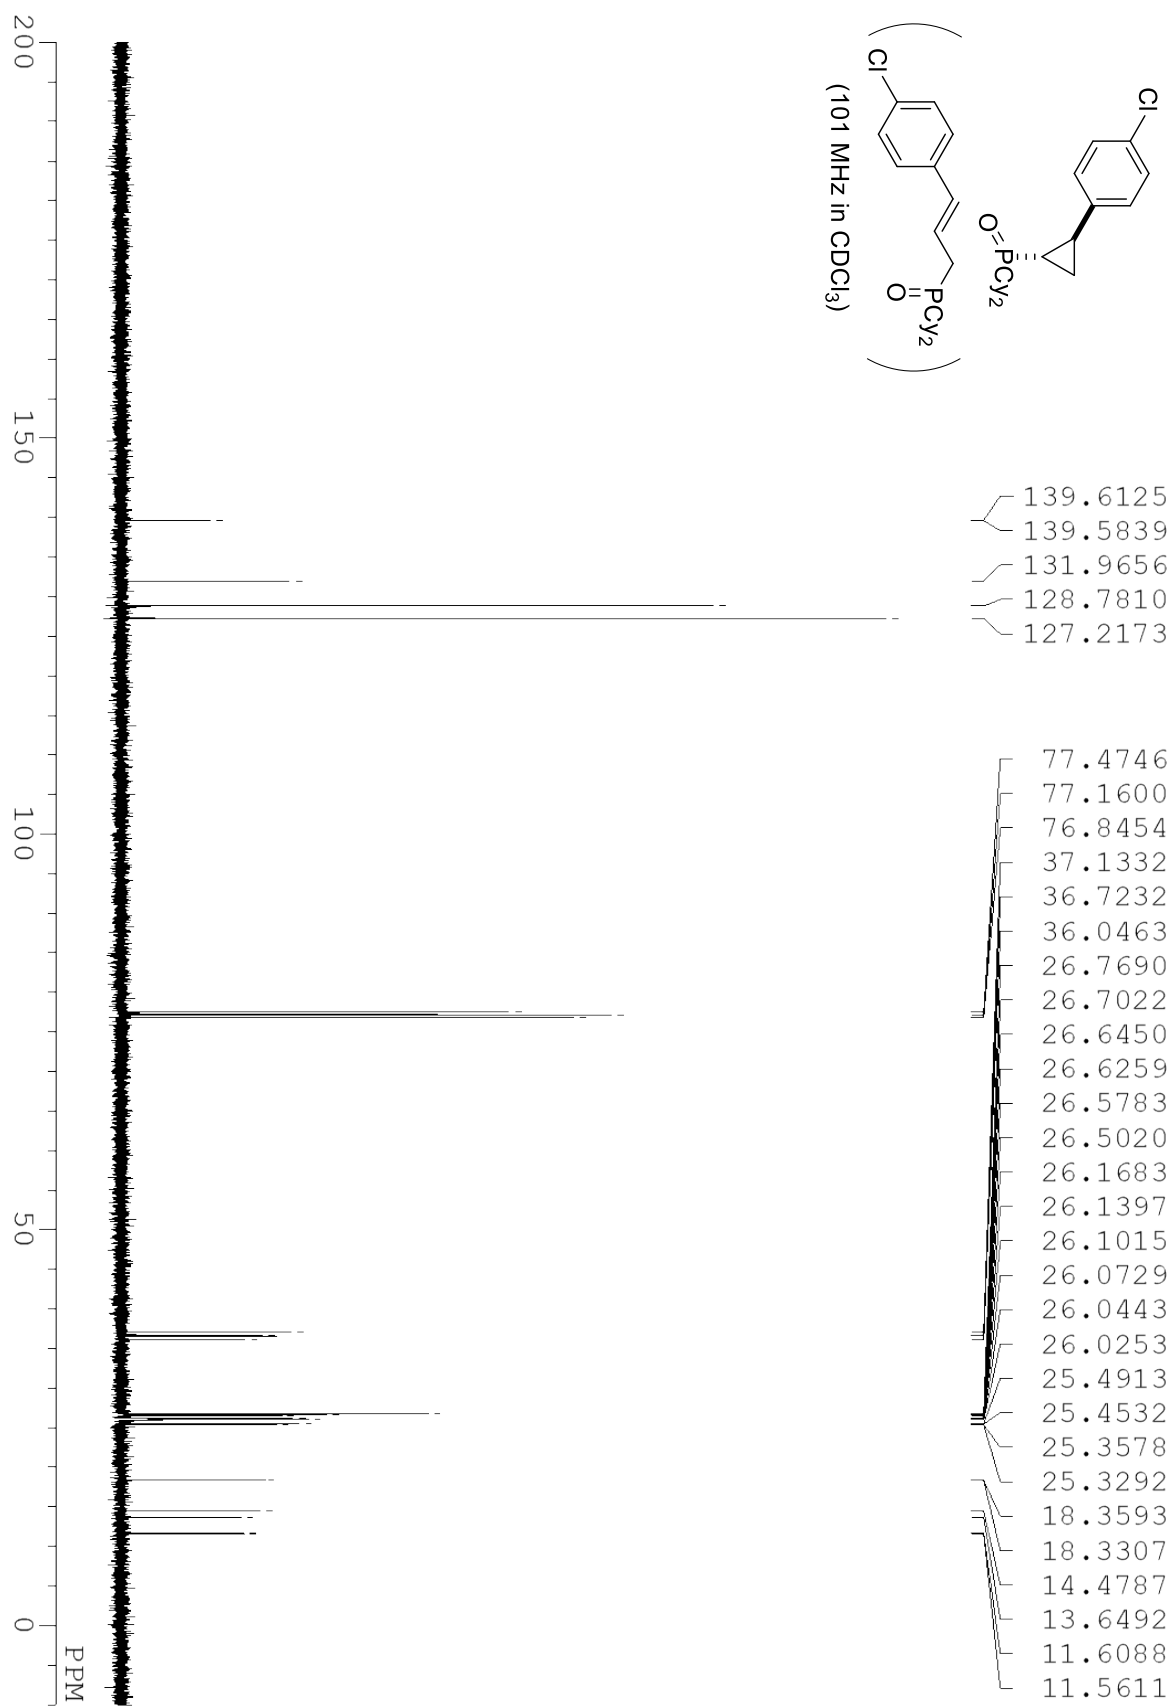

compound **3da** (**4da**)

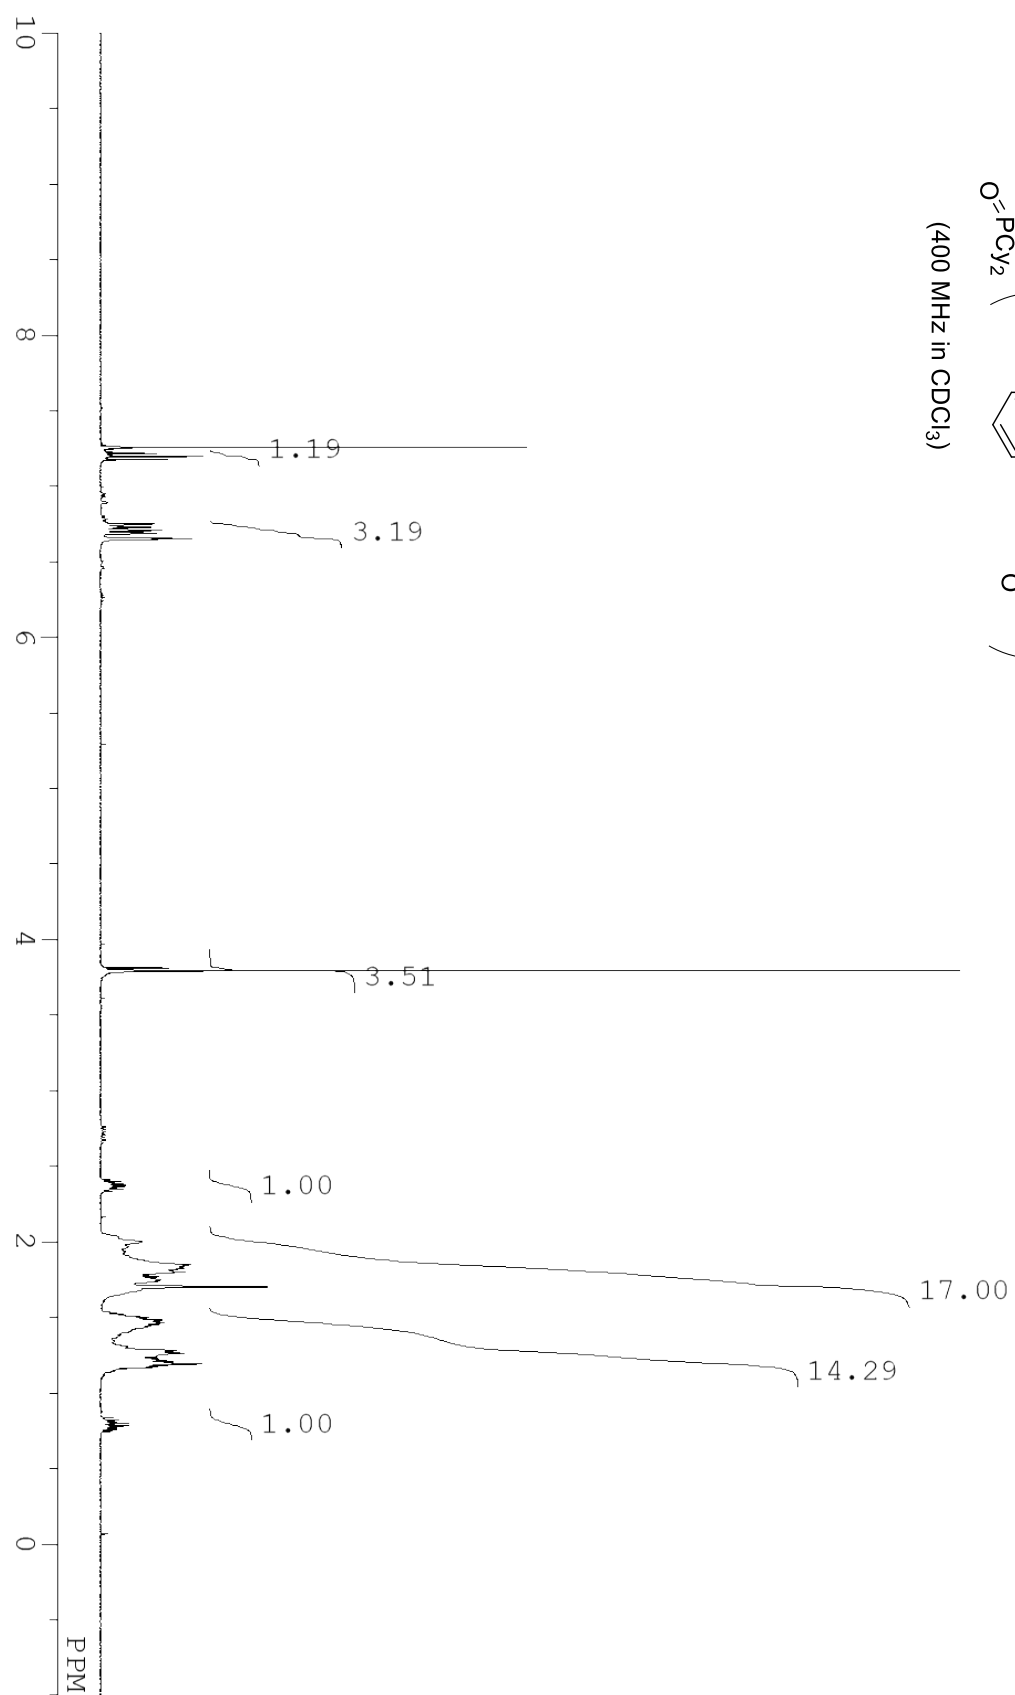

compound 3da (4da)

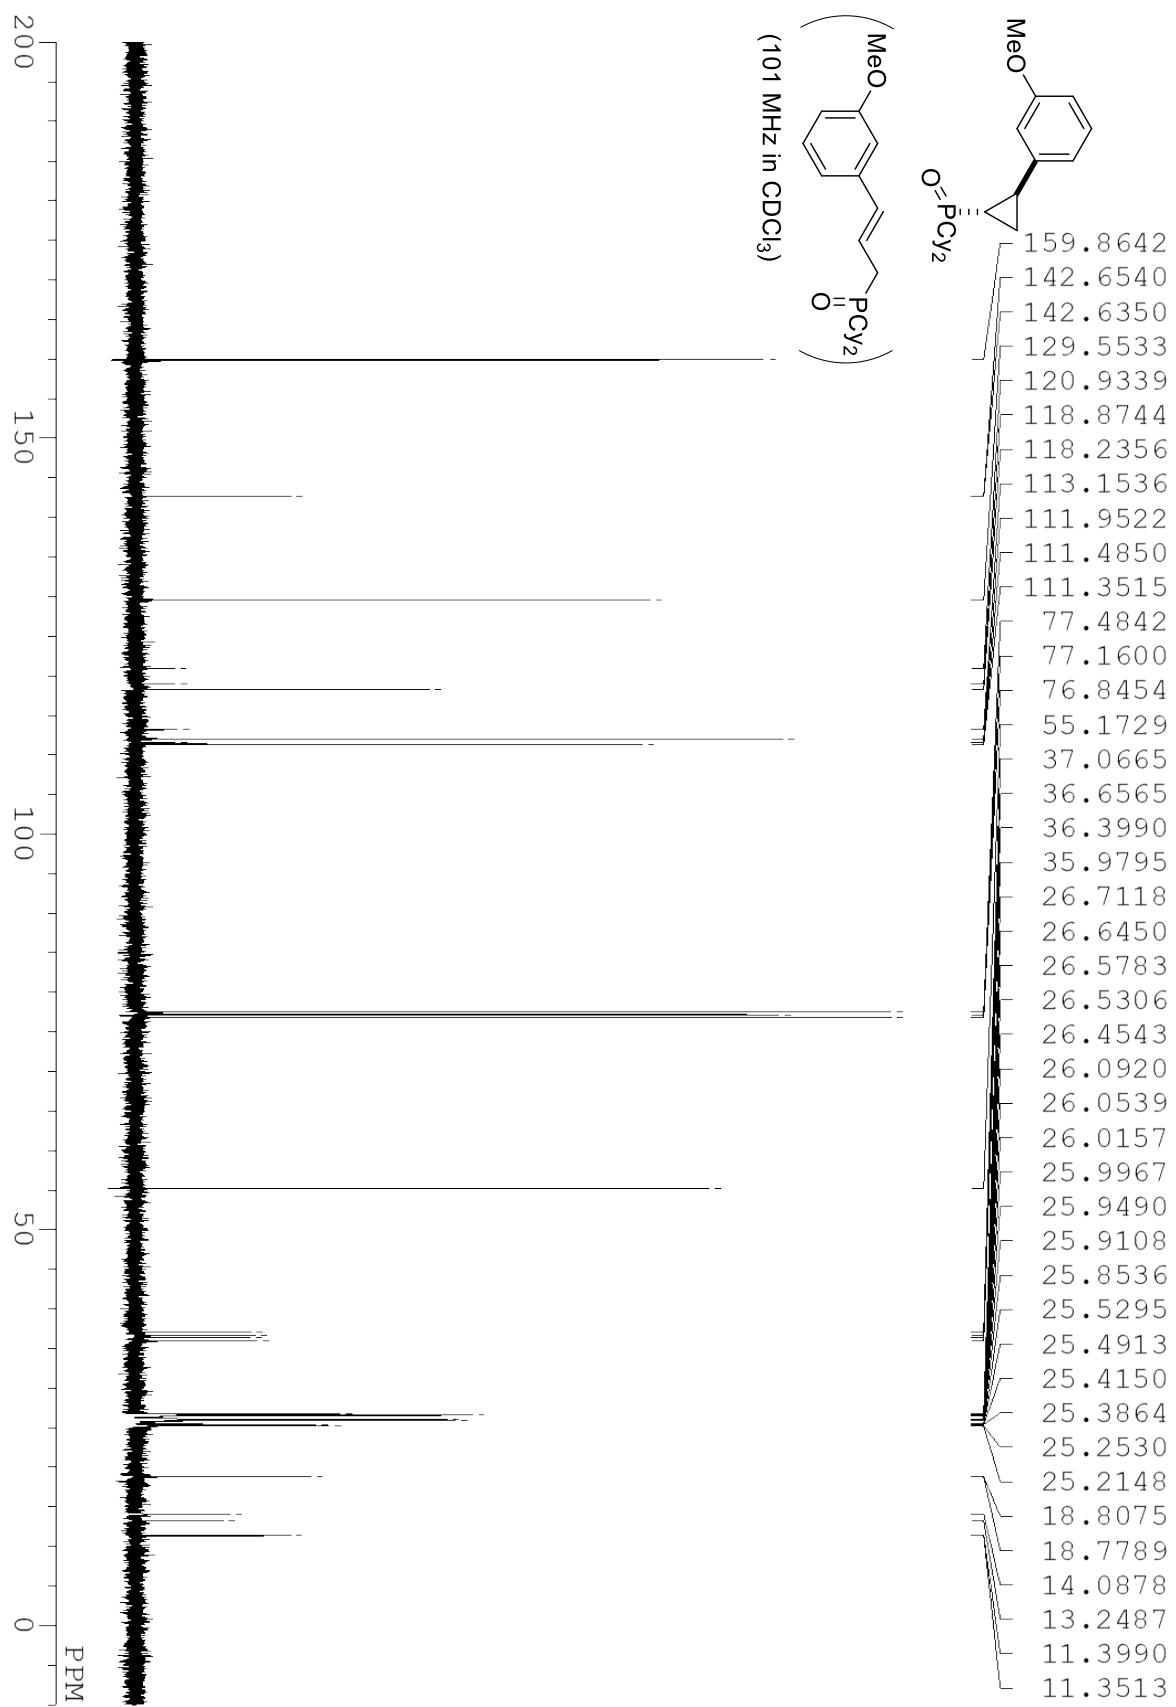

compound **3ea** (**4ea**)

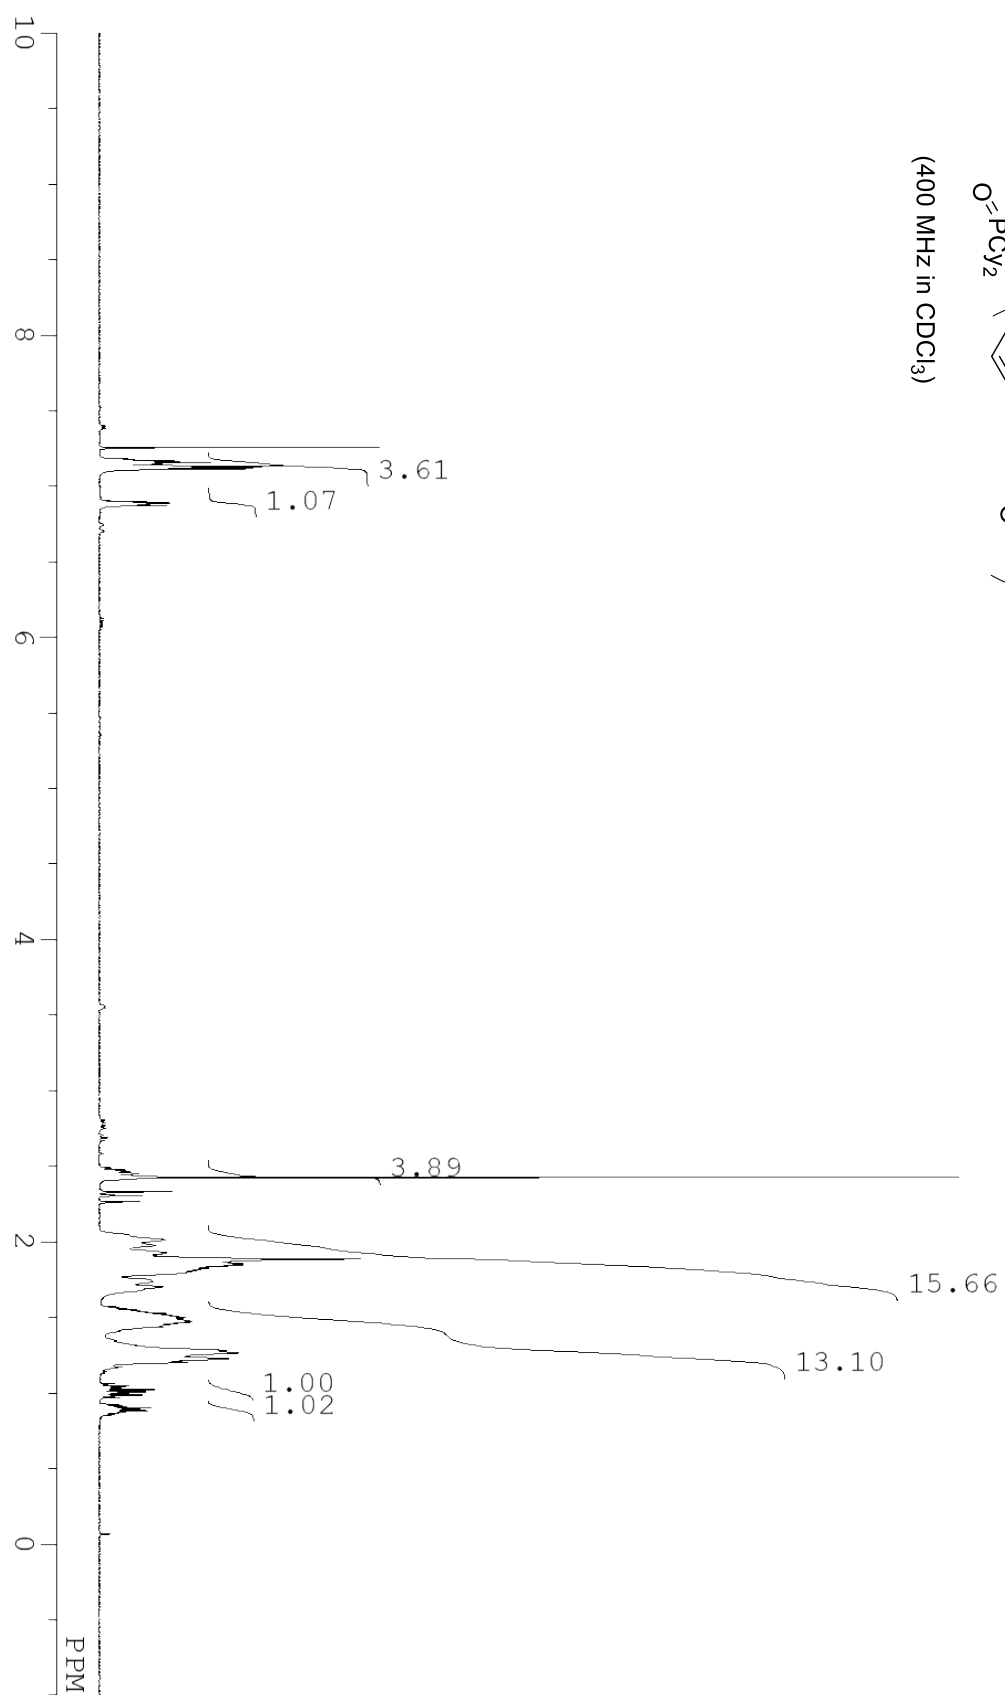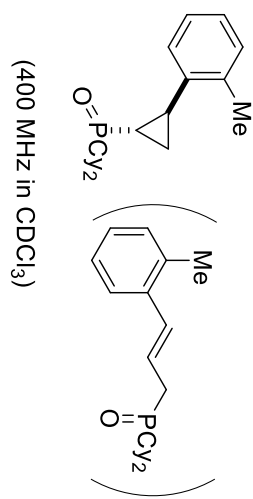

compound 3ea (4ea)

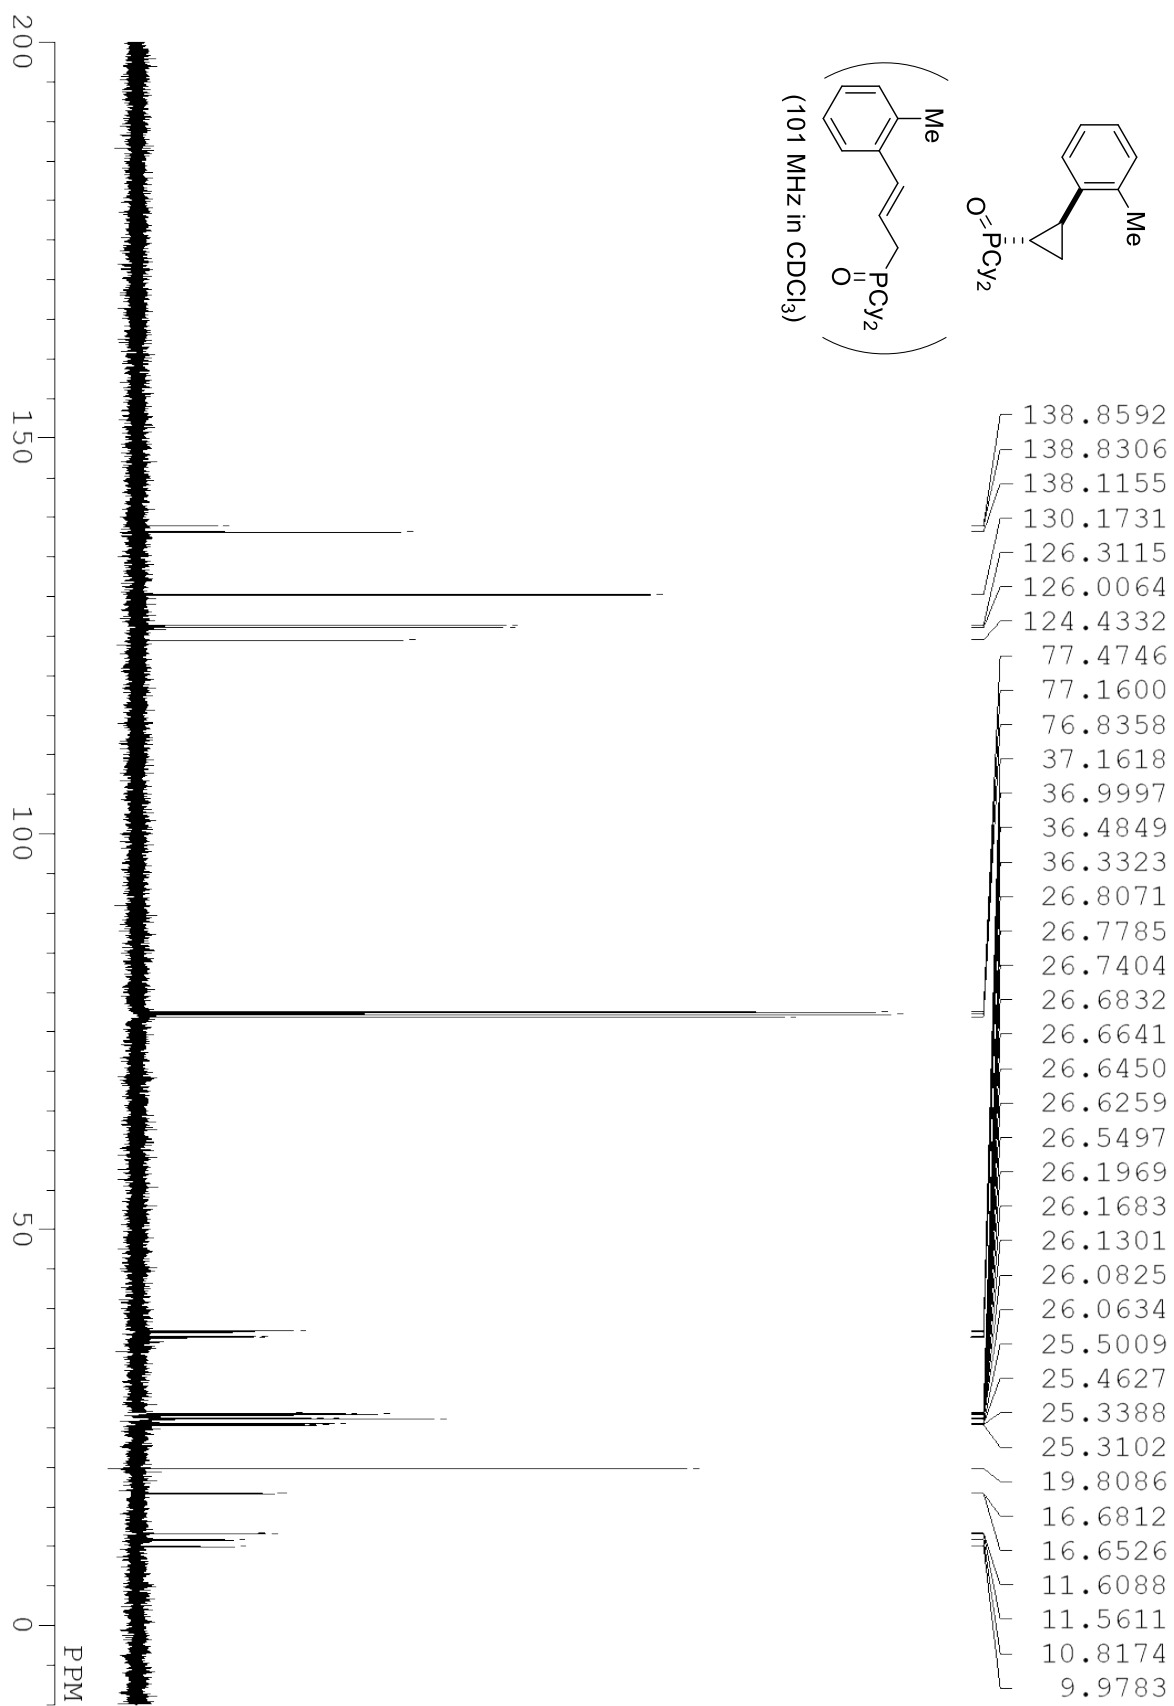

compound **3fa** (**4fa**)

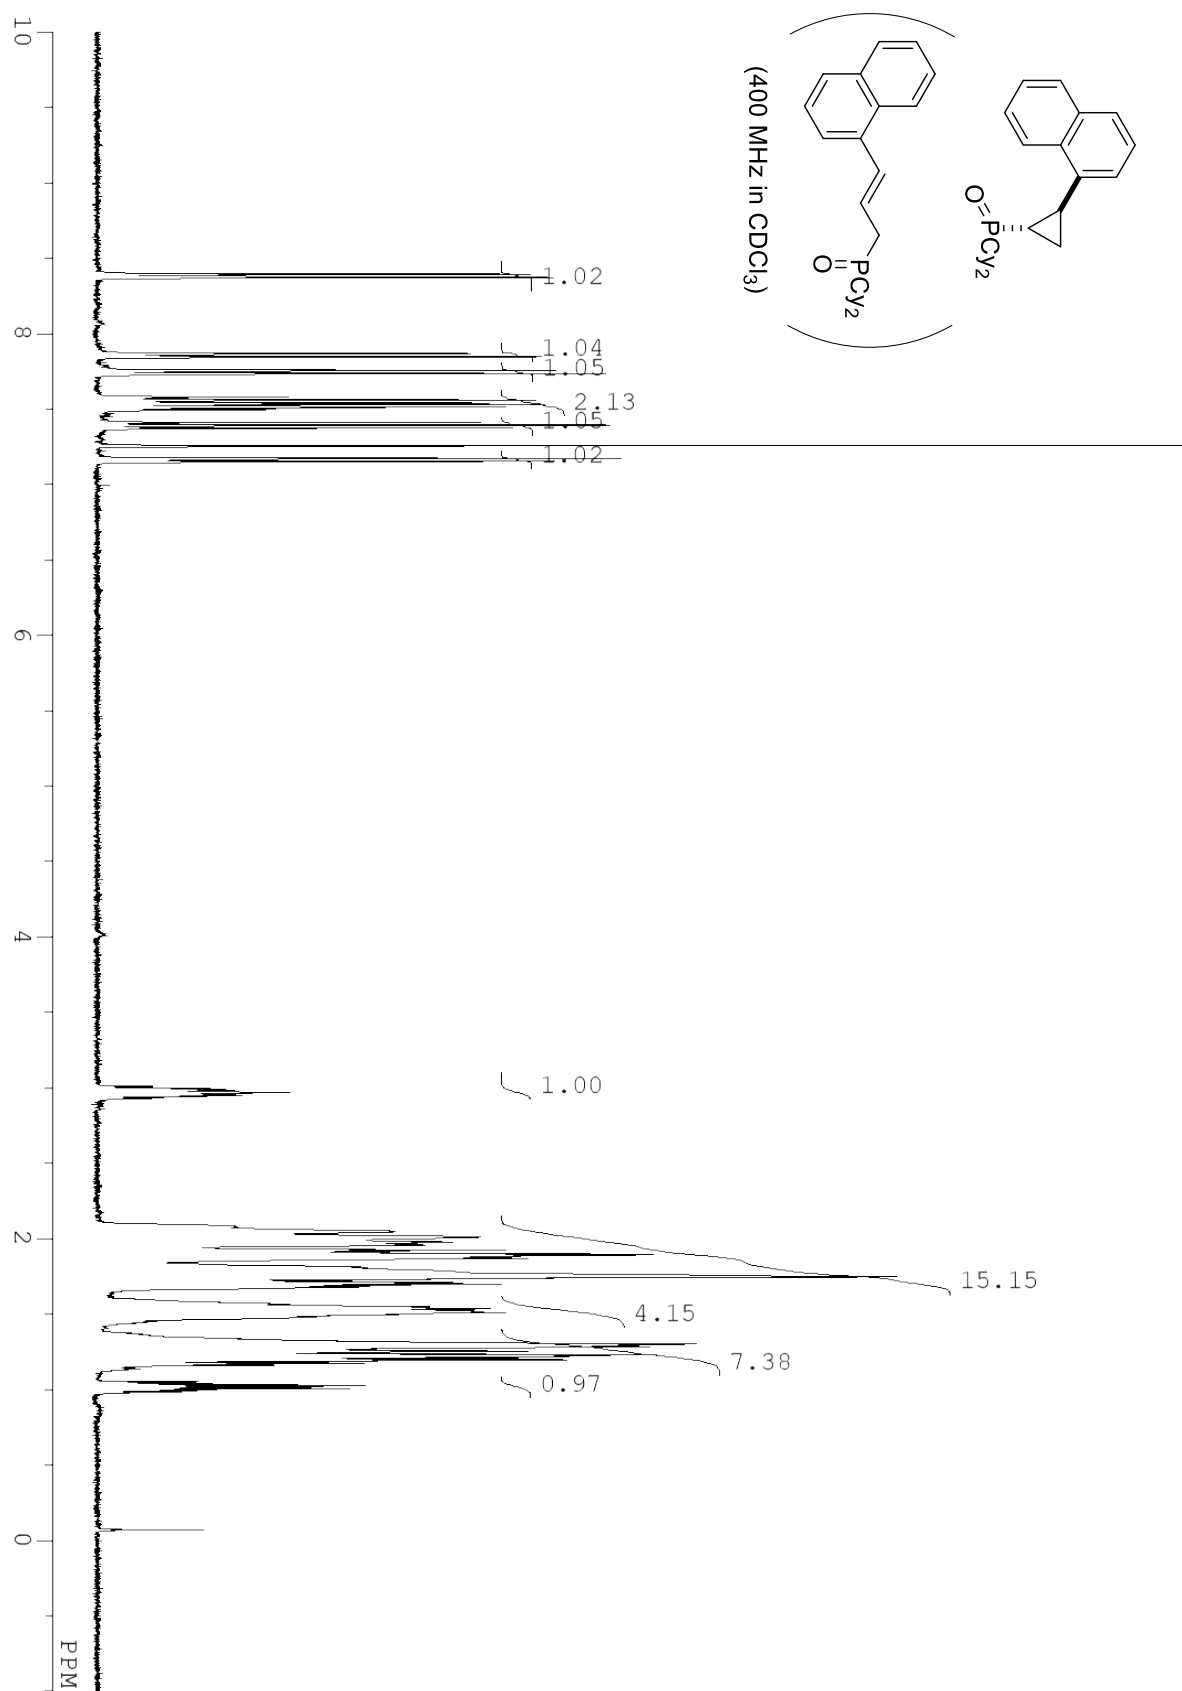



compound 3fa (4fa)

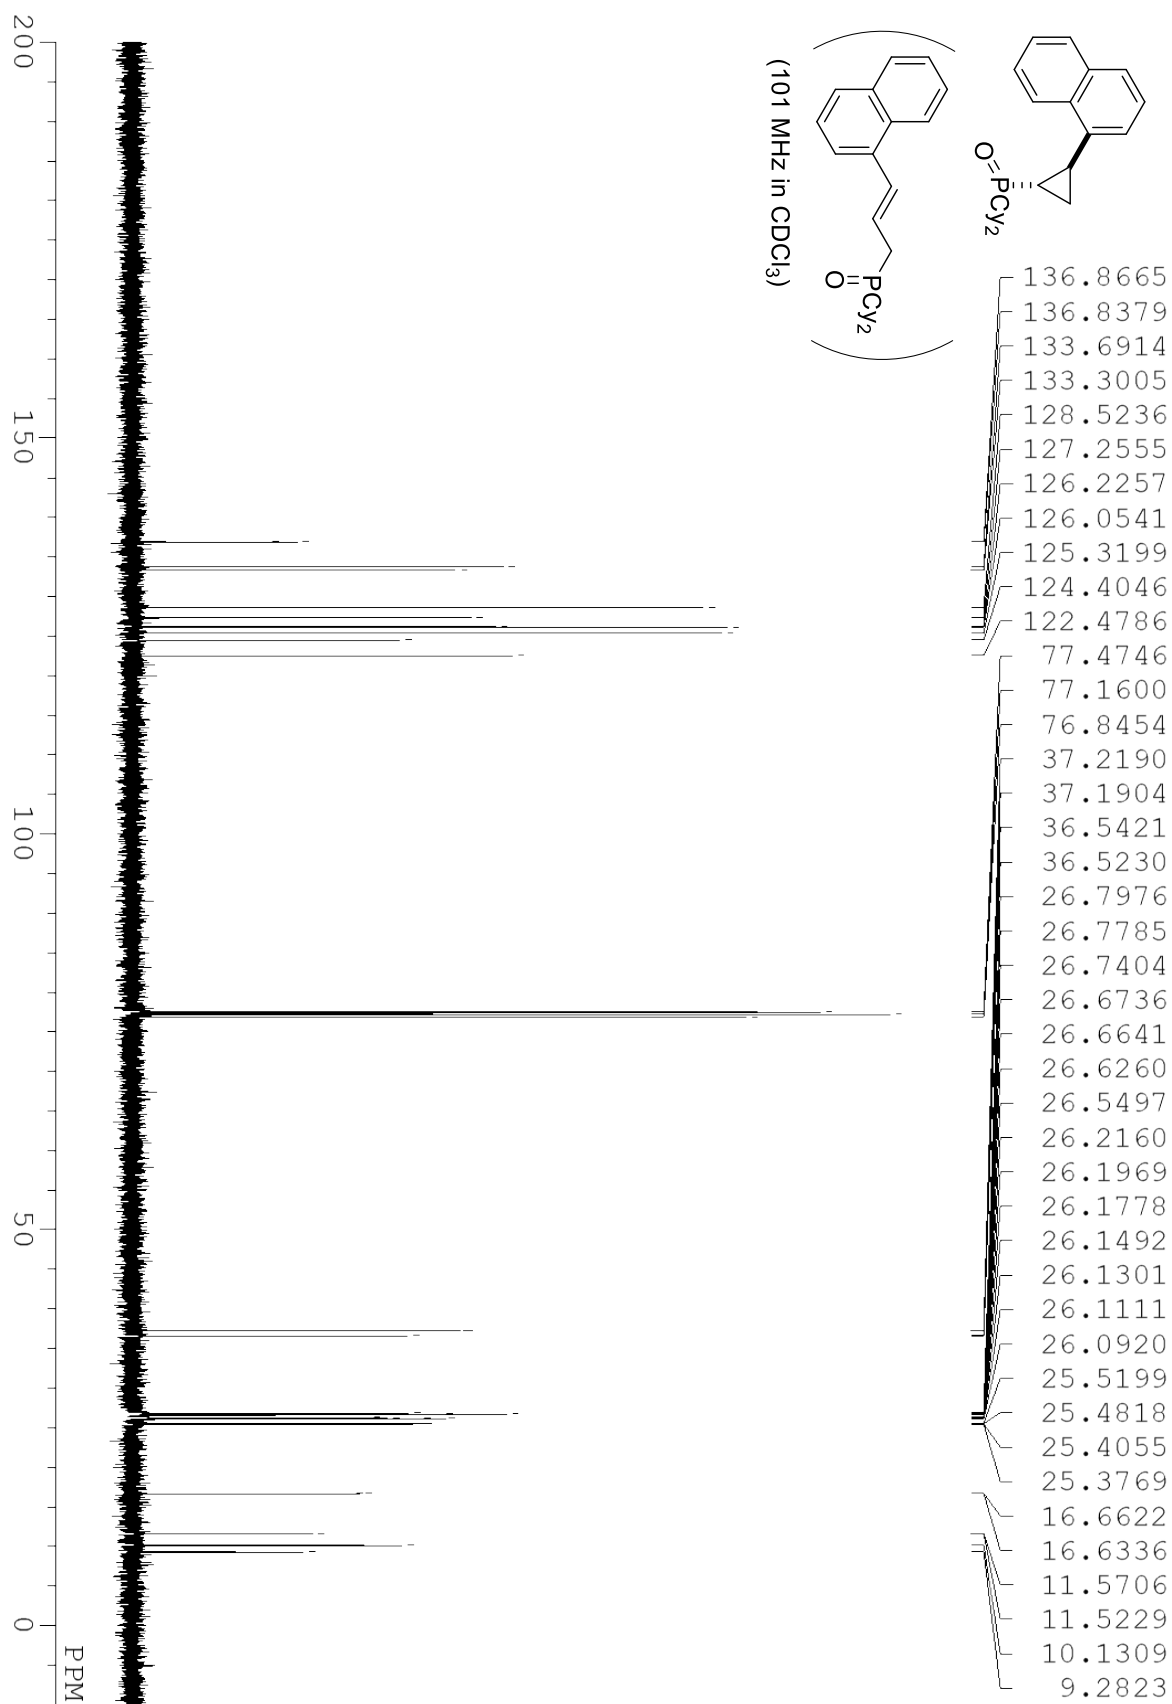

compound 3ga (4ga)

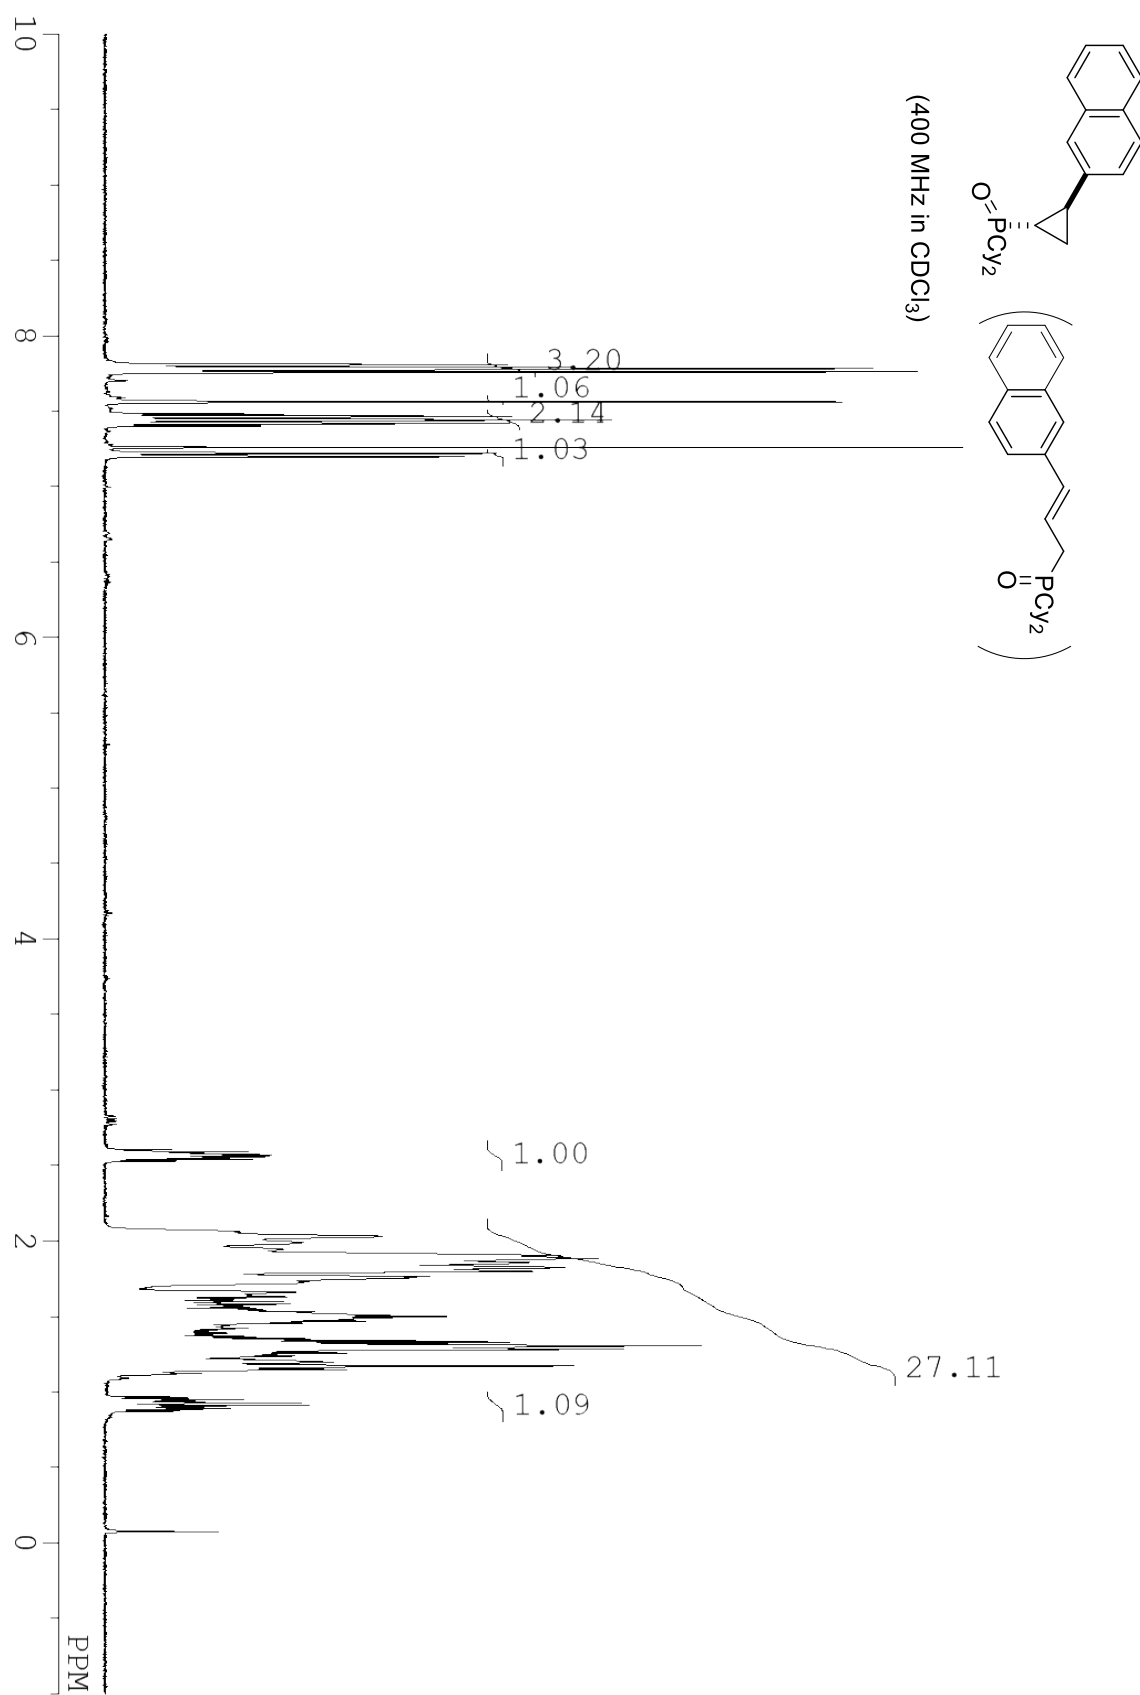

compound 3ga (4ga)

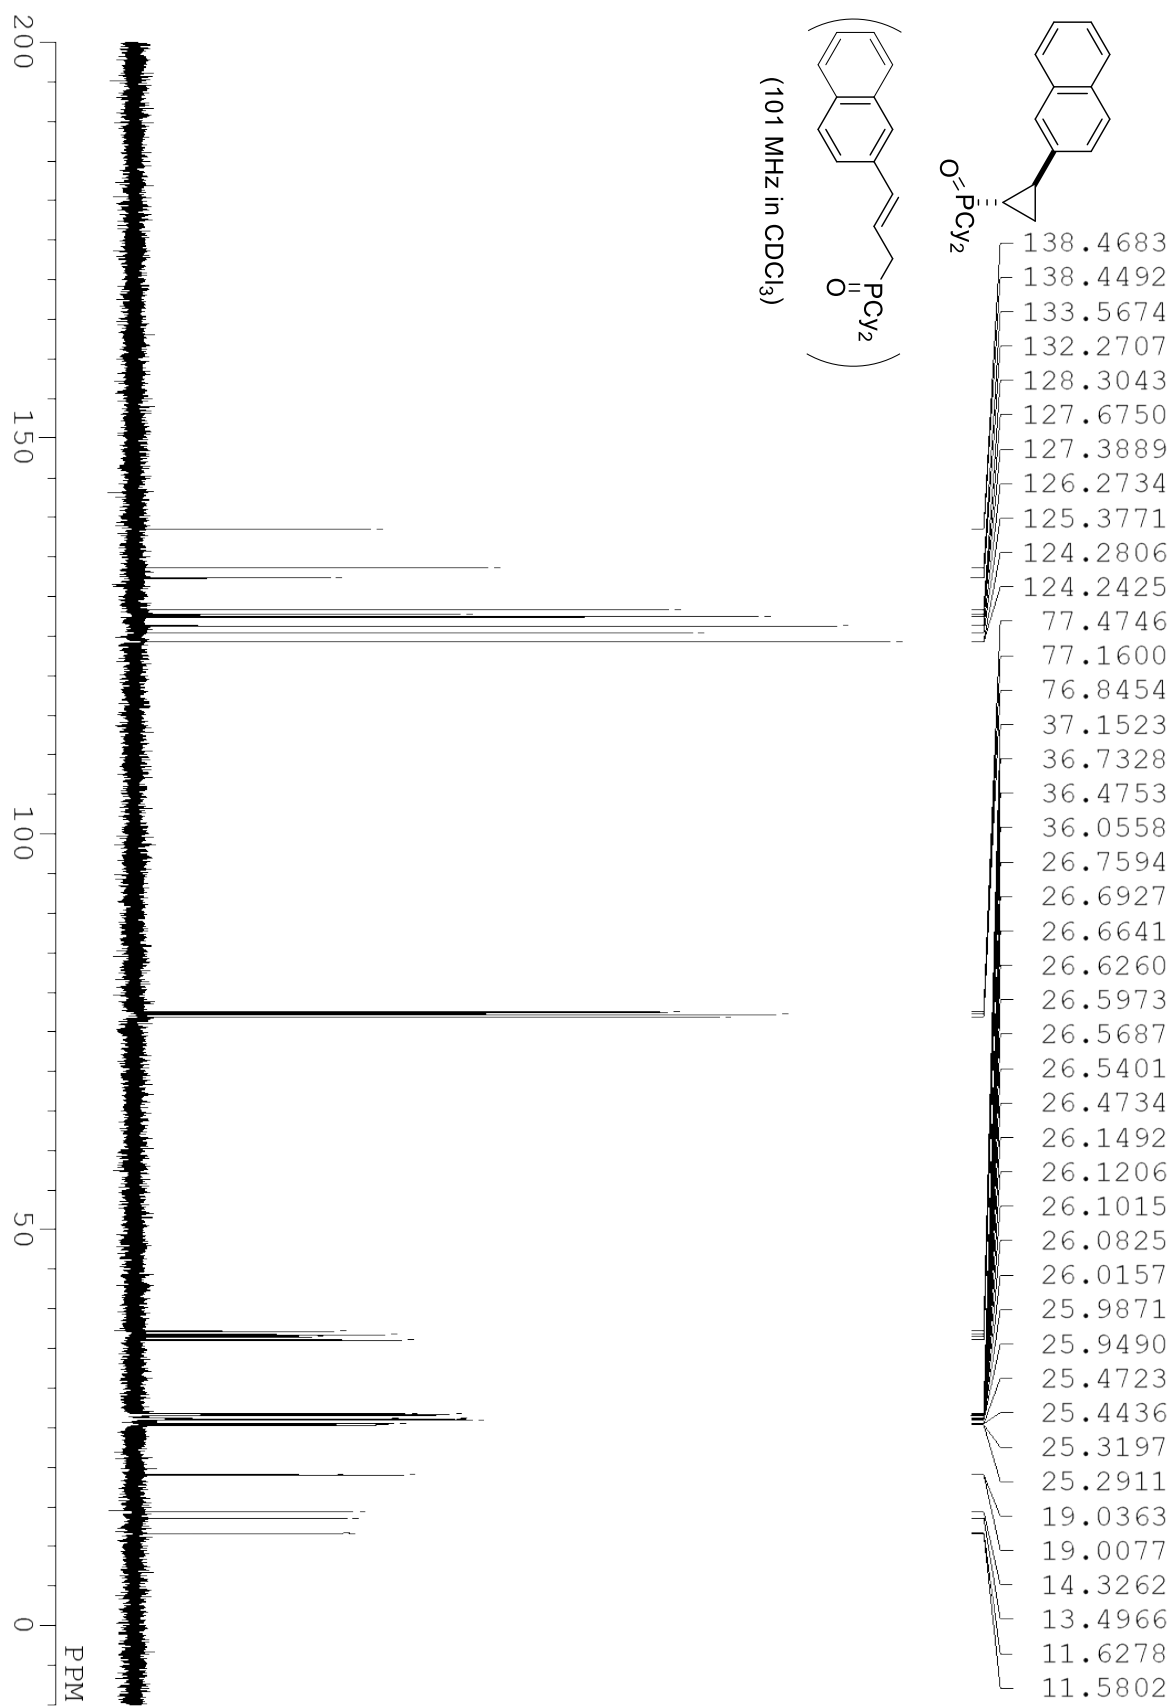

compound **3ha** (**4ha**)

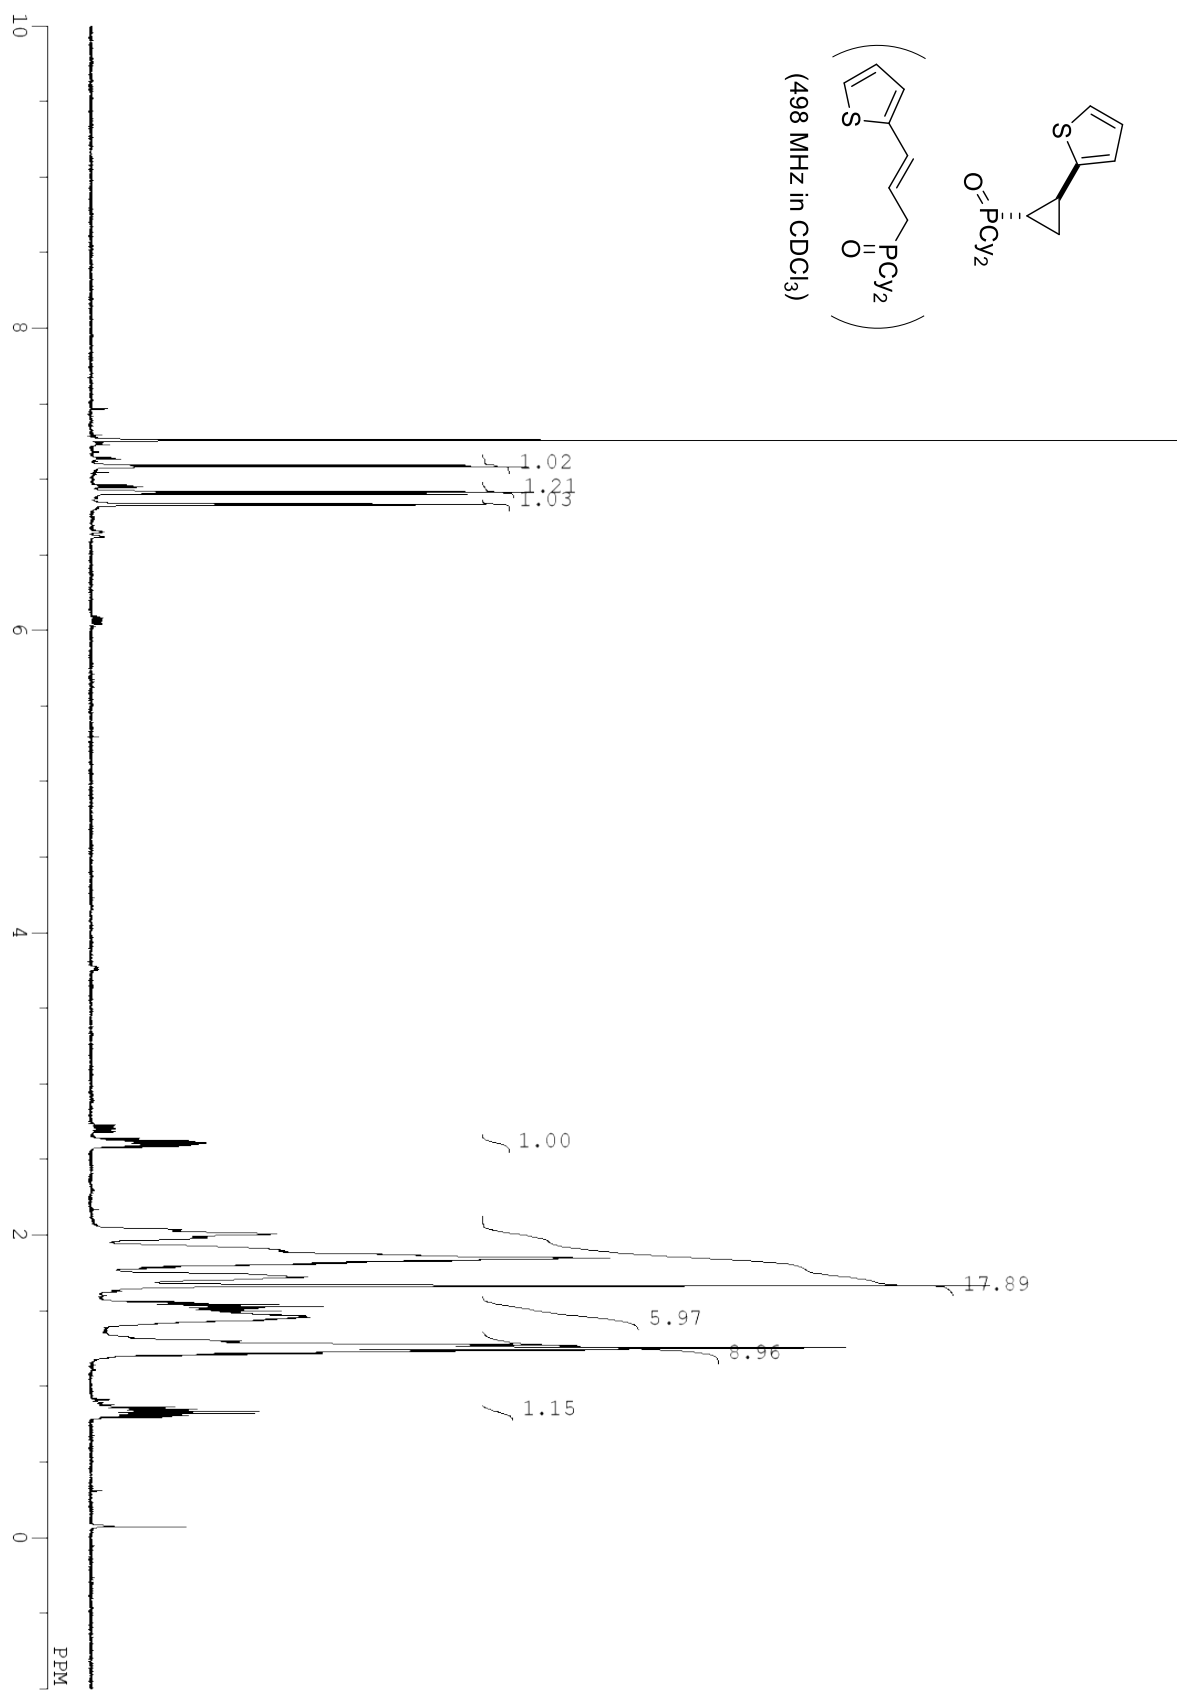

compound **3ha** (**4ha**)

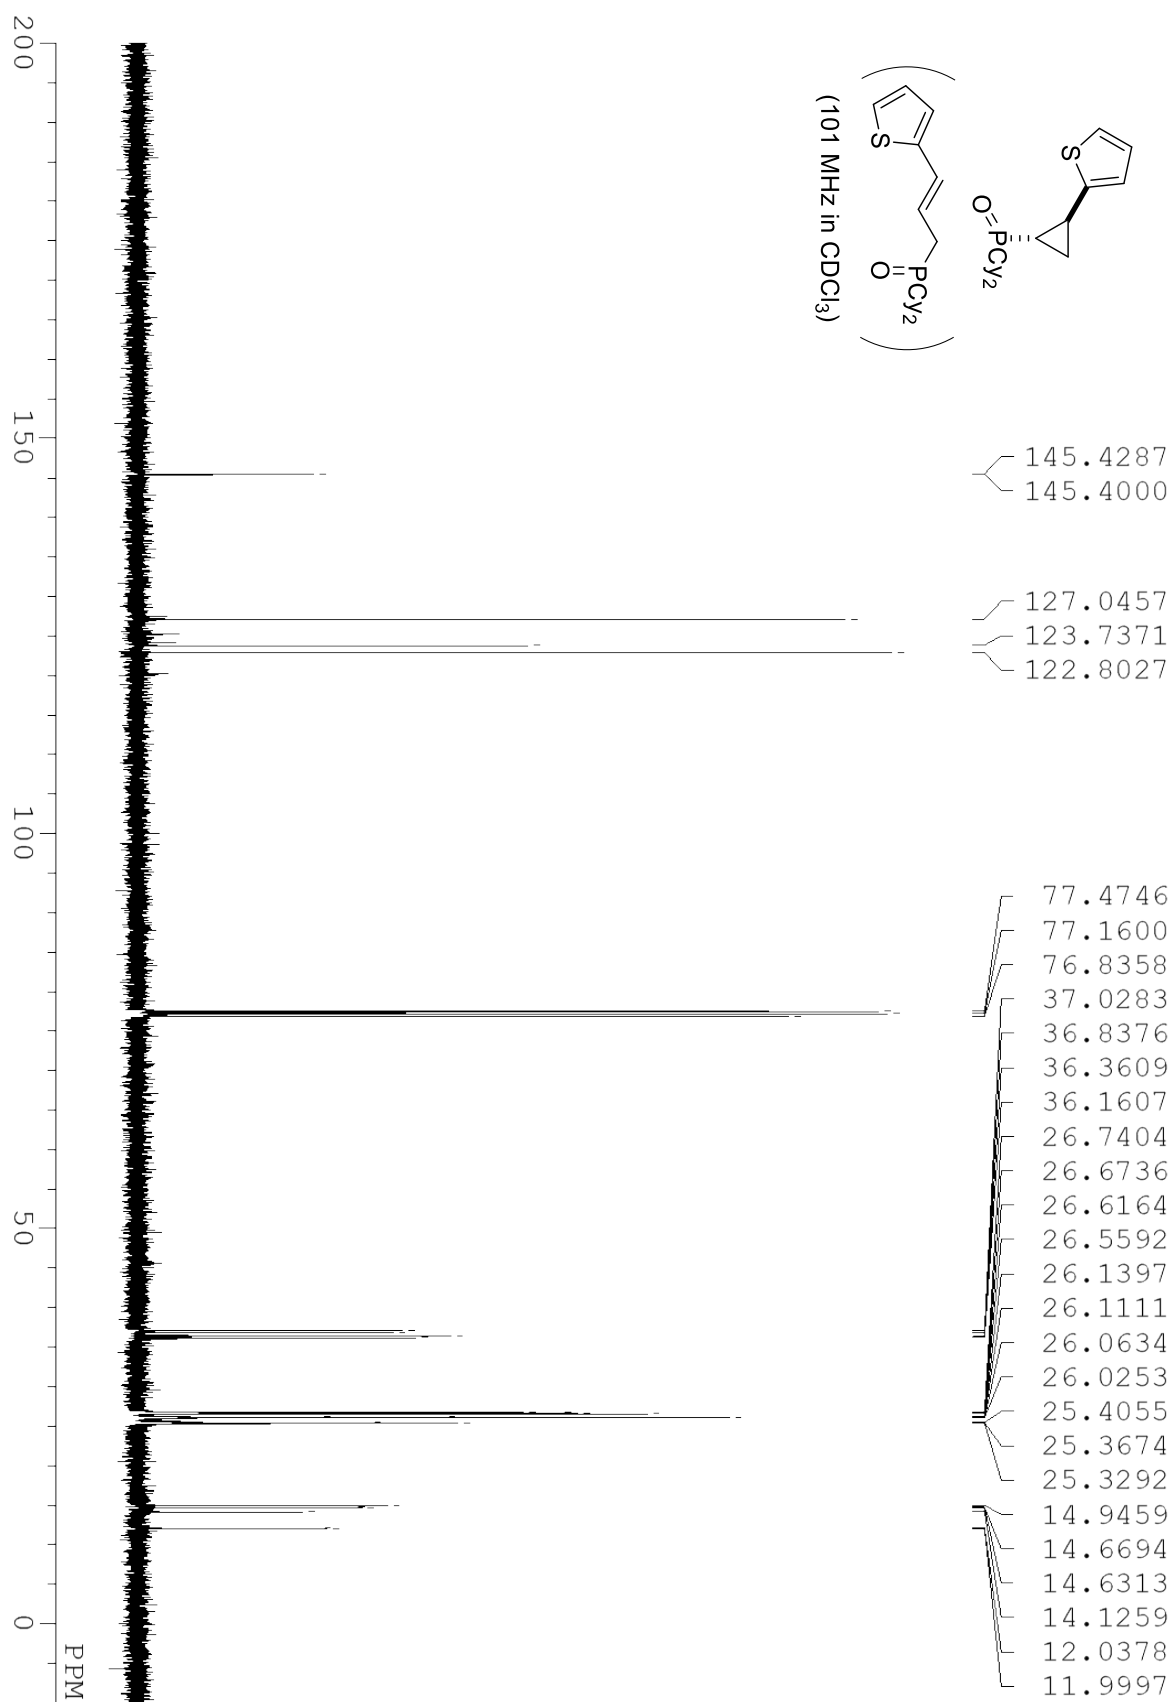

compound **3ia** (**4ia**)

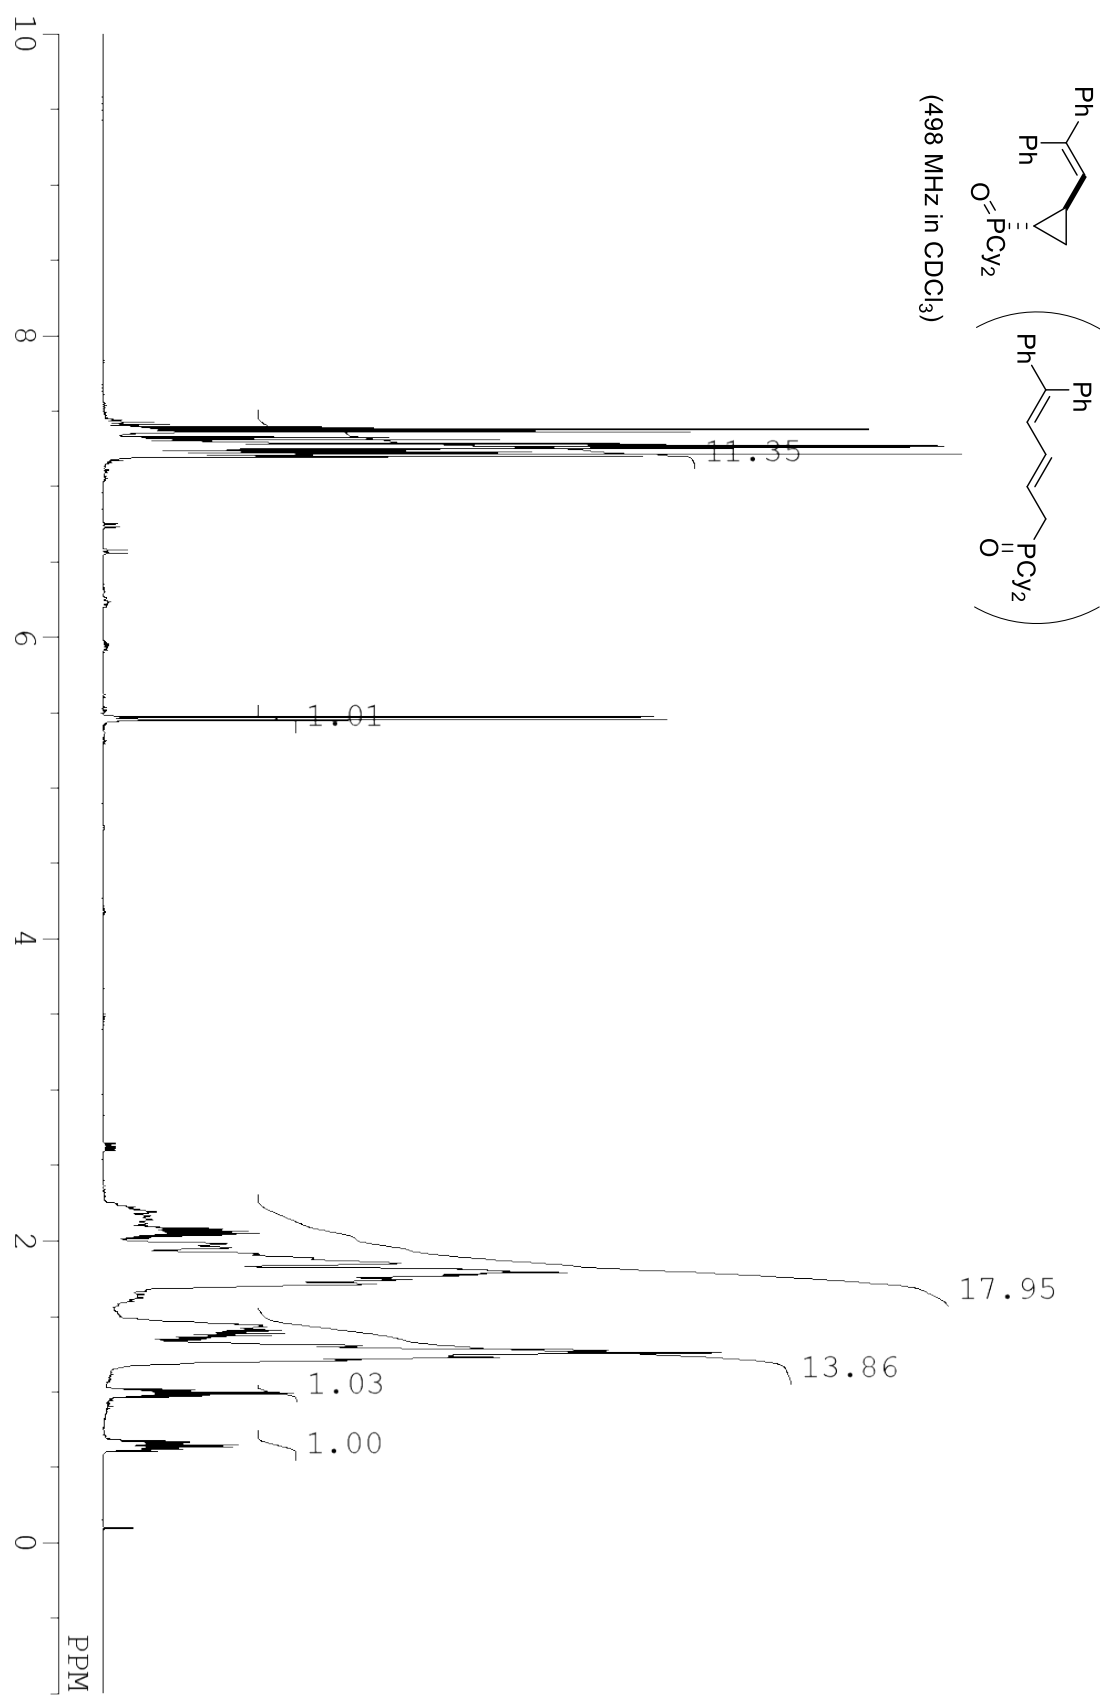

compound **3ia** (**4ia**)

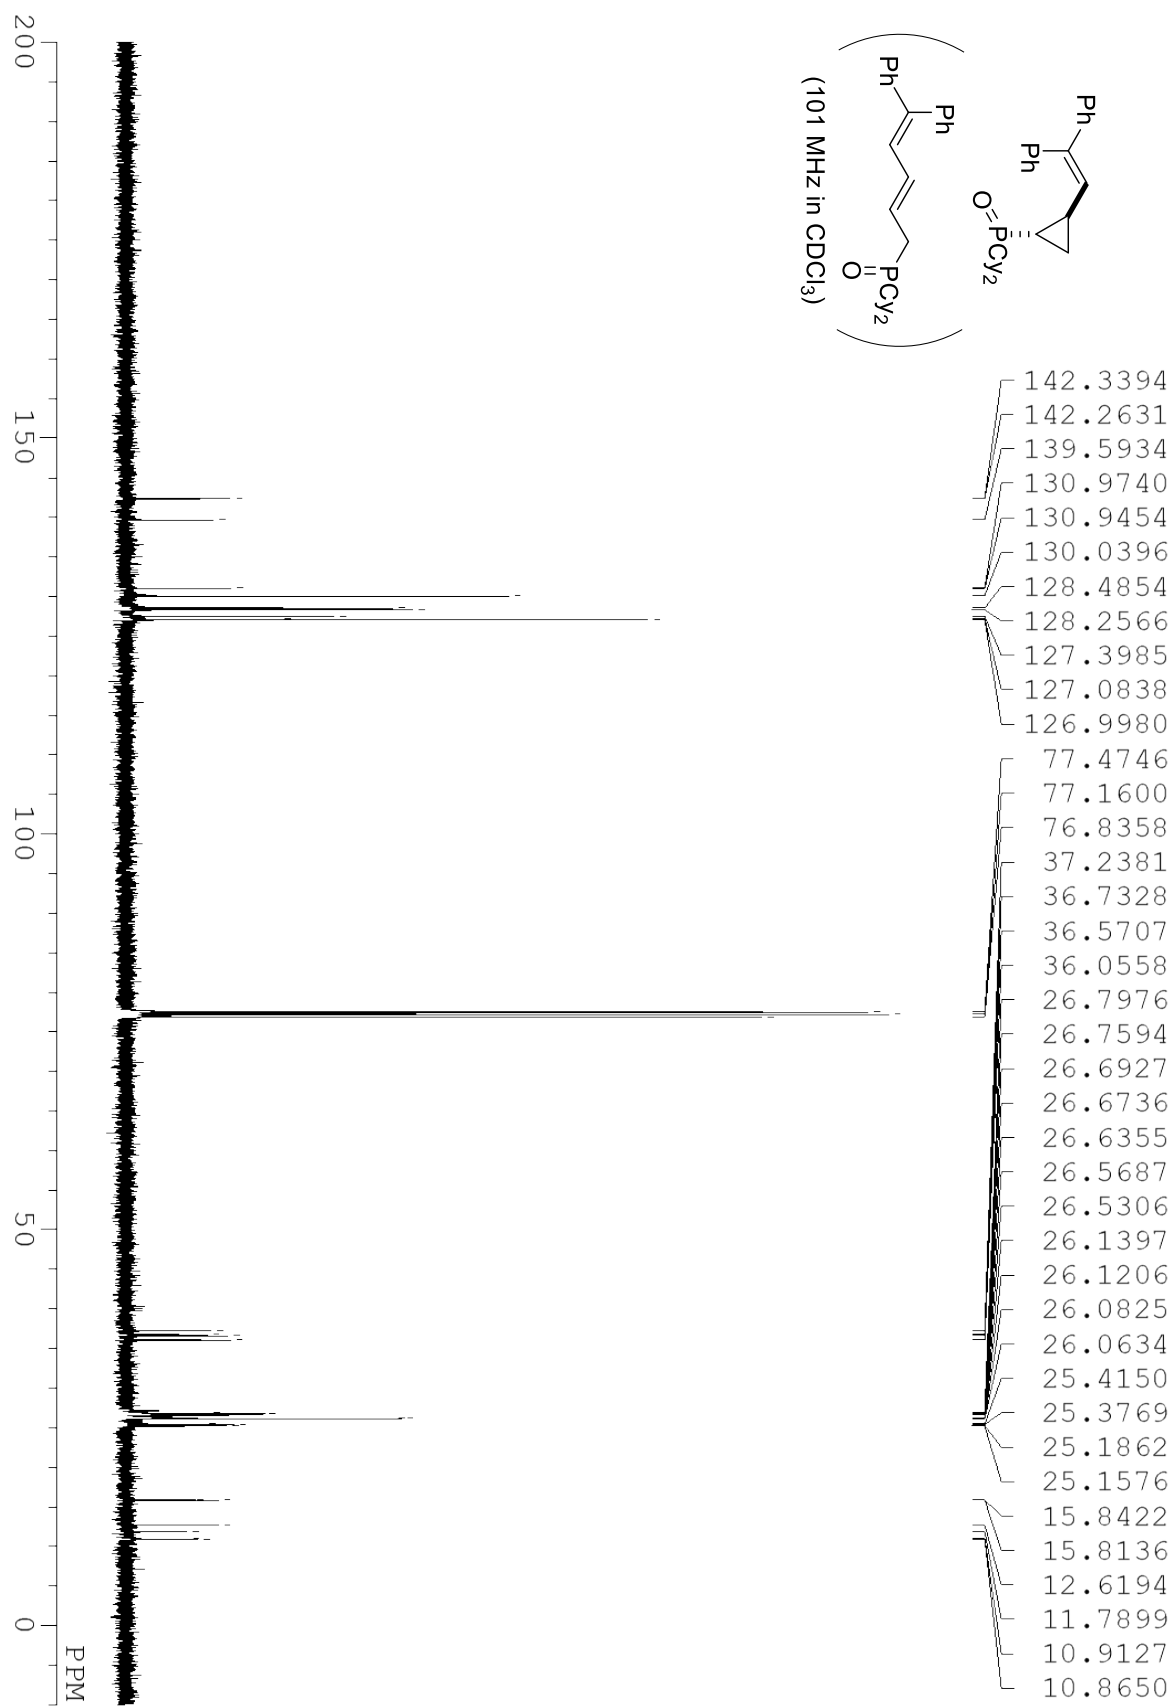

compound **4ja**

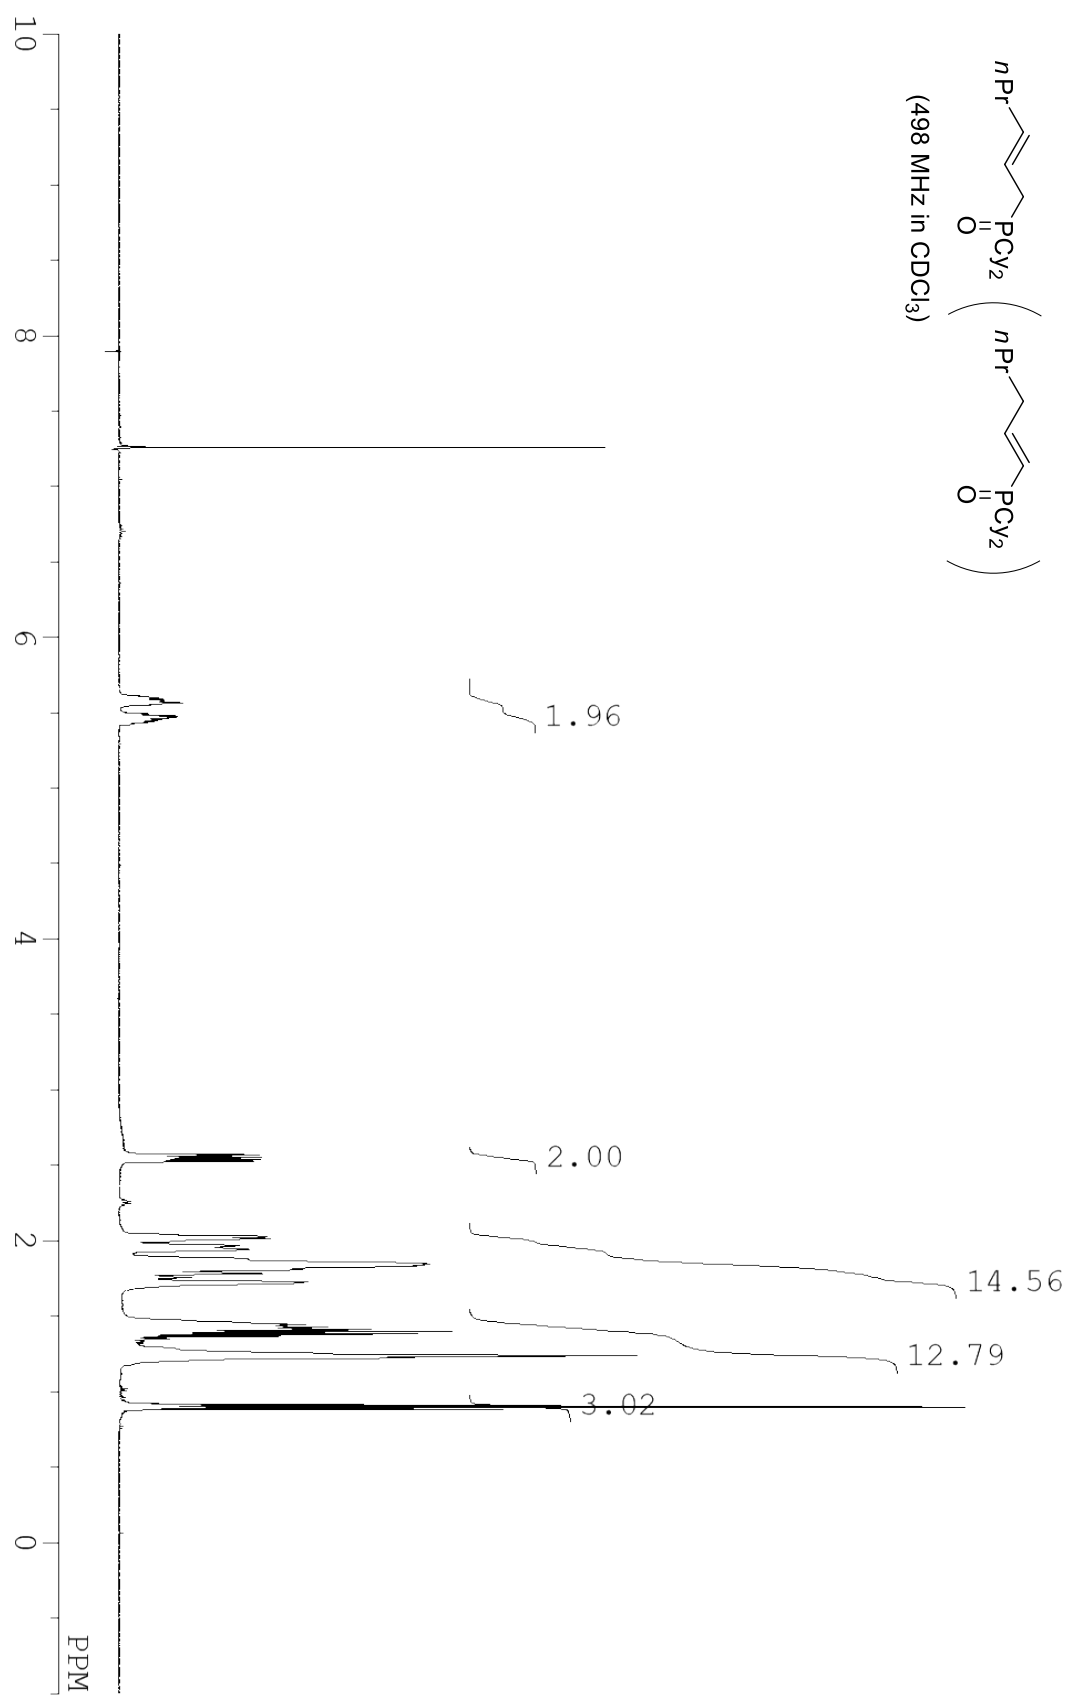



compound 4ja

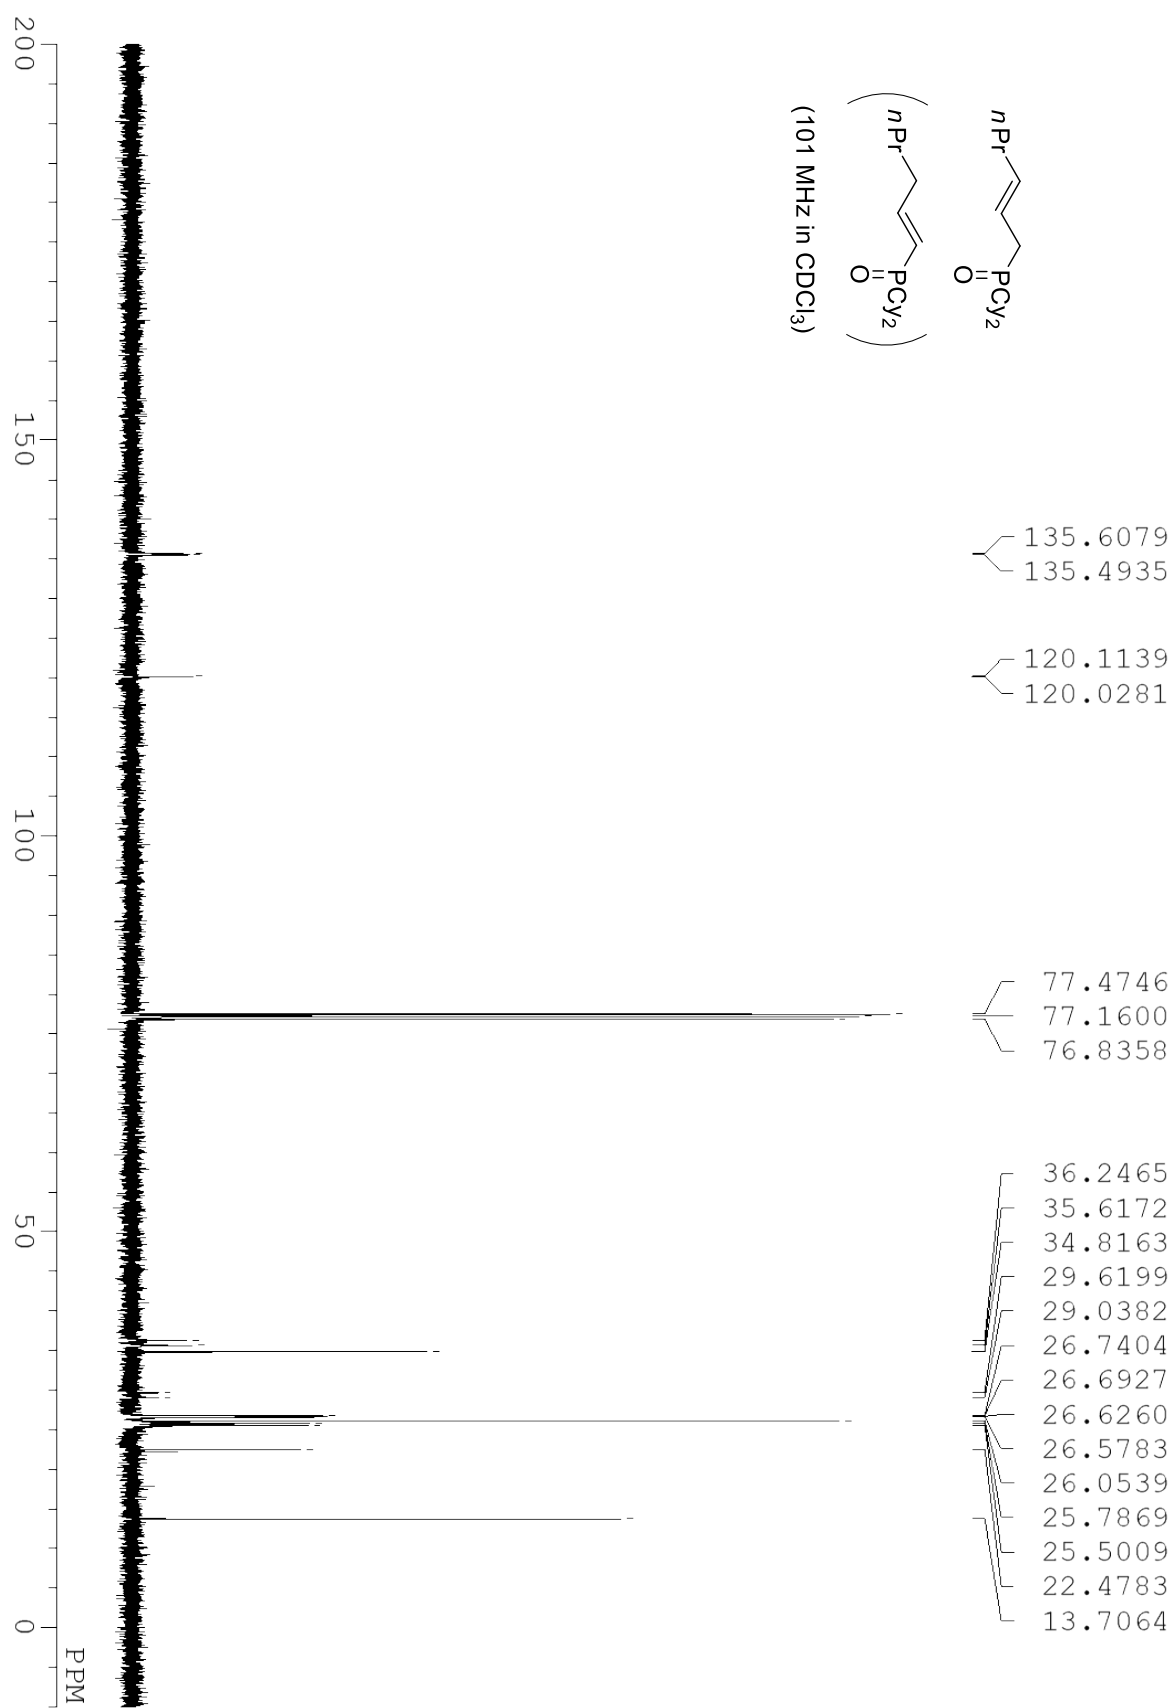

compound **3ka**

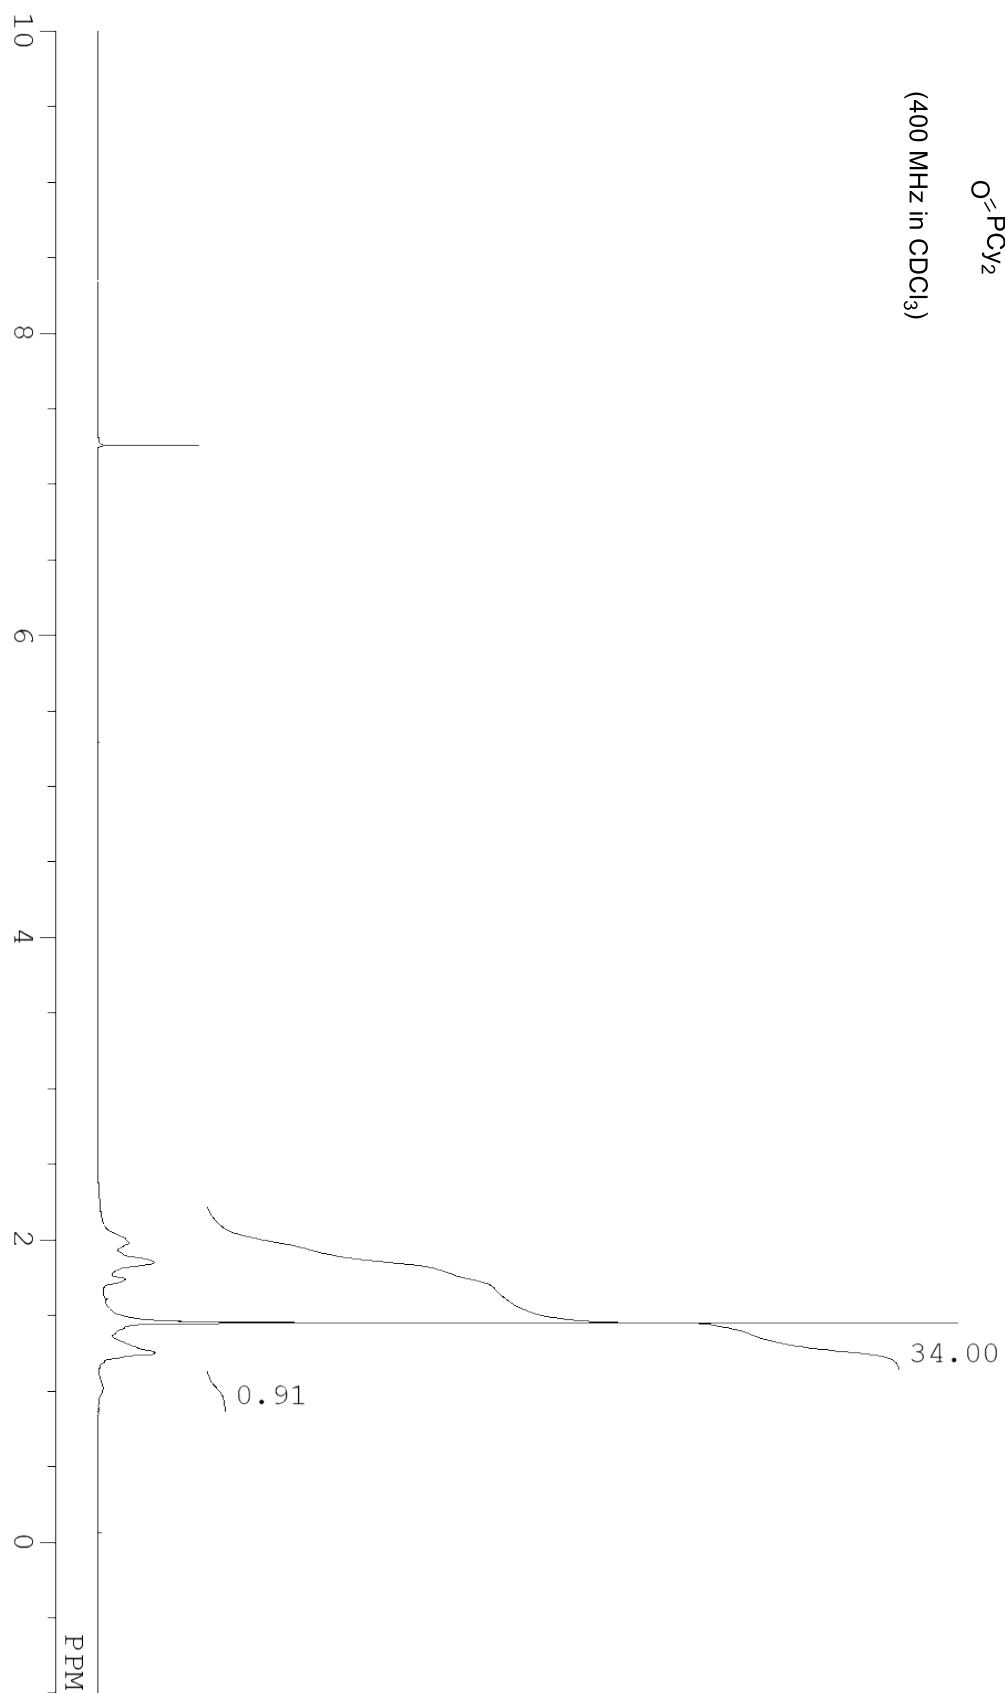

compound 3ka

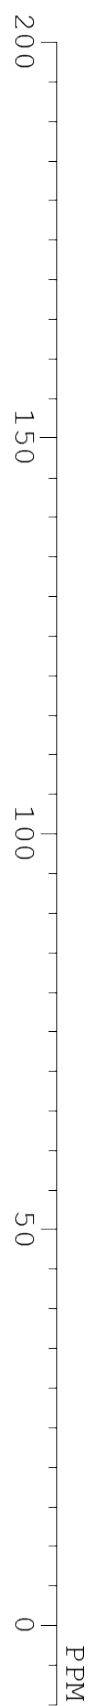

(101 MHz in CDCl<sub>3</sub>)

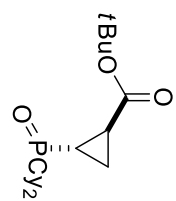

— 172.3166

81.0025  
77.4842  
77.1600  
76.8454

36.9235  
35.9891  
28.1324  
26.5973  
26.5783  
26.5592  
26.5306  
26.1206  
26.0825  
25.9585  
25.2243  
25.1671  
17.2152  
12.5622  
9.6446

compound **3la** (**4la**)

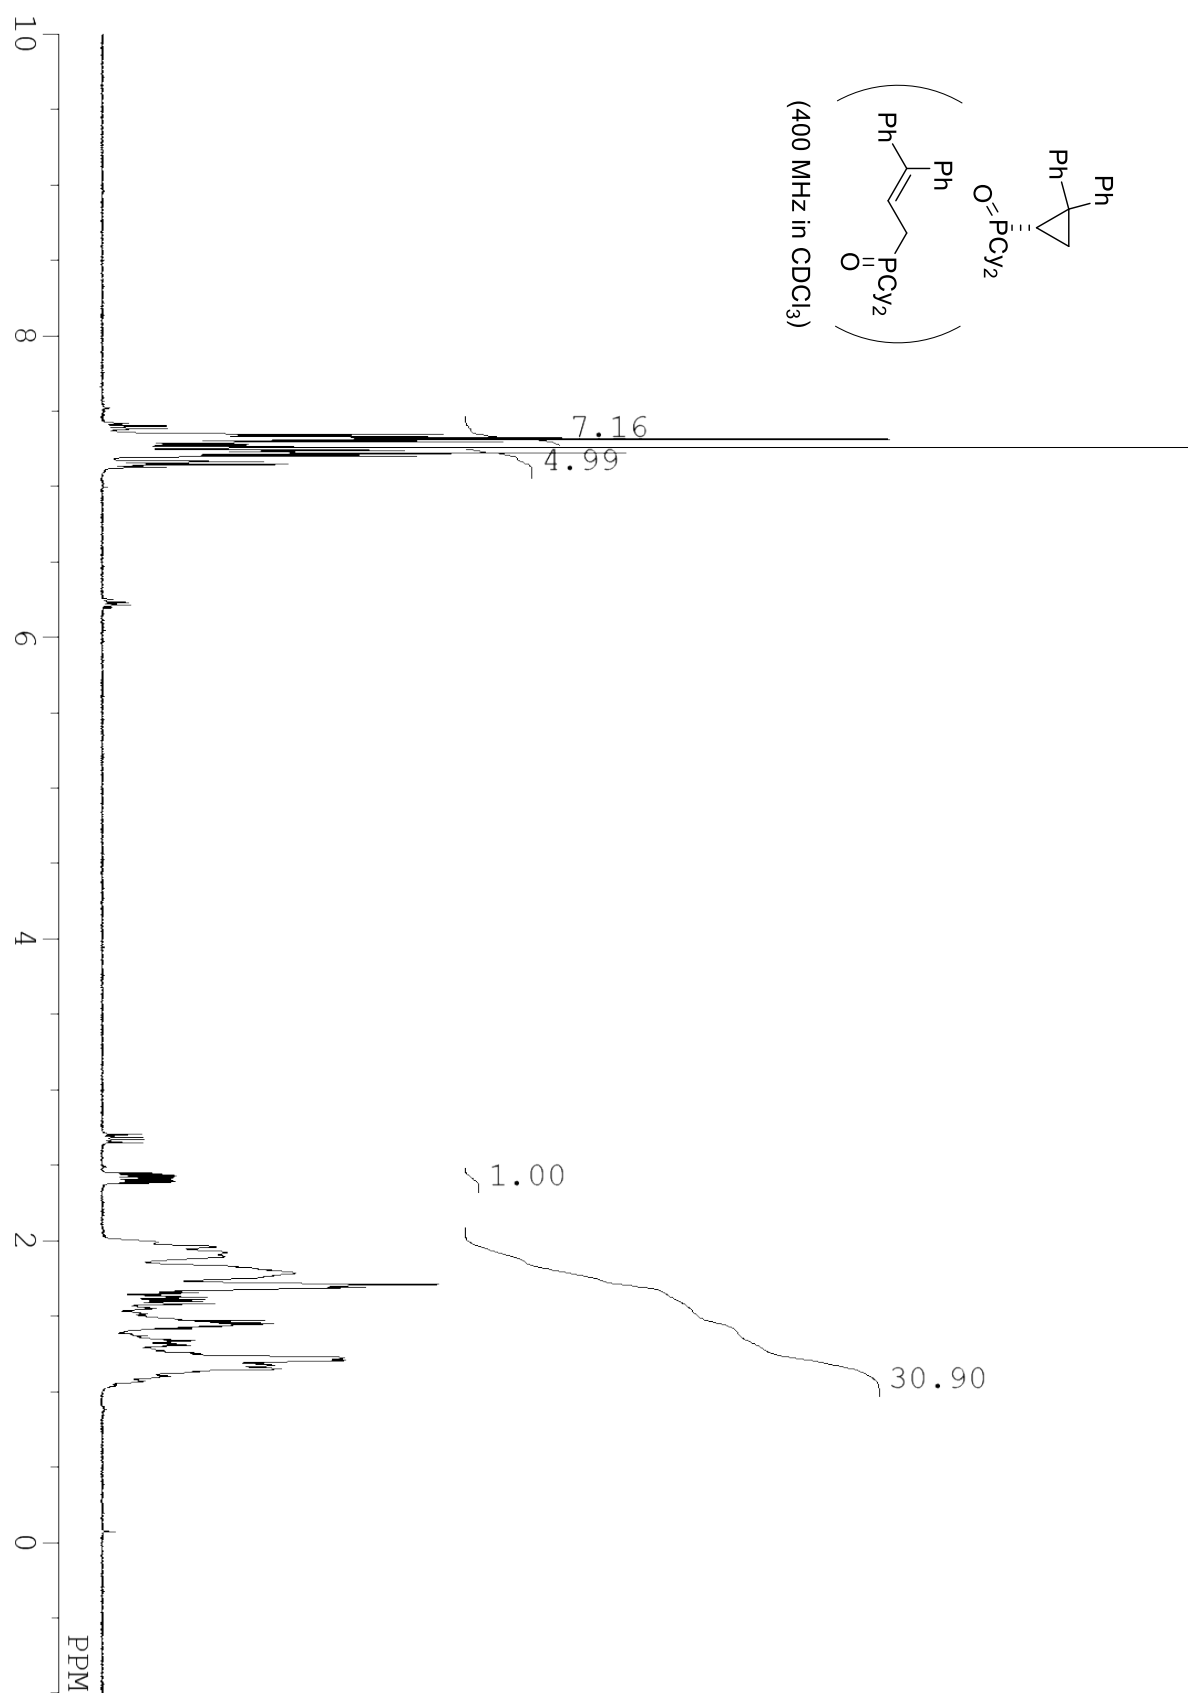

compound **3la** (**4la**)

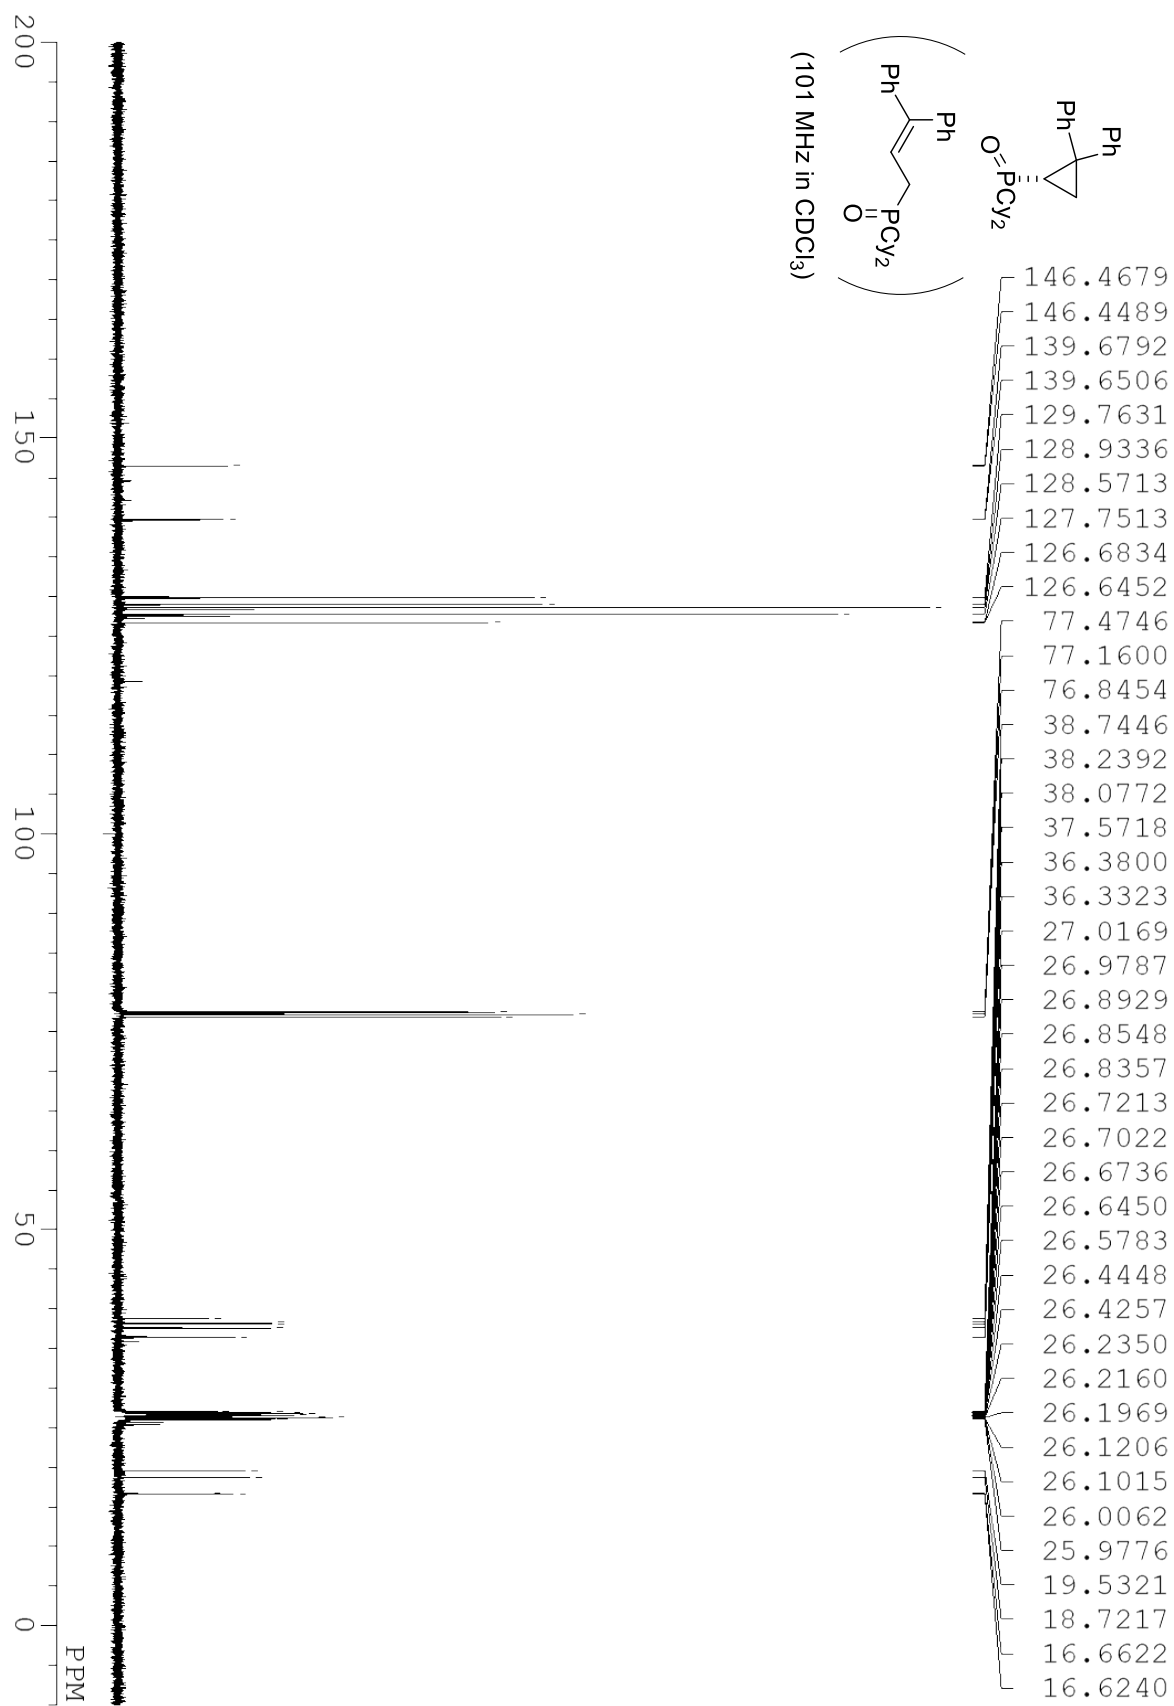

compound **3ma** (**4ma'**)

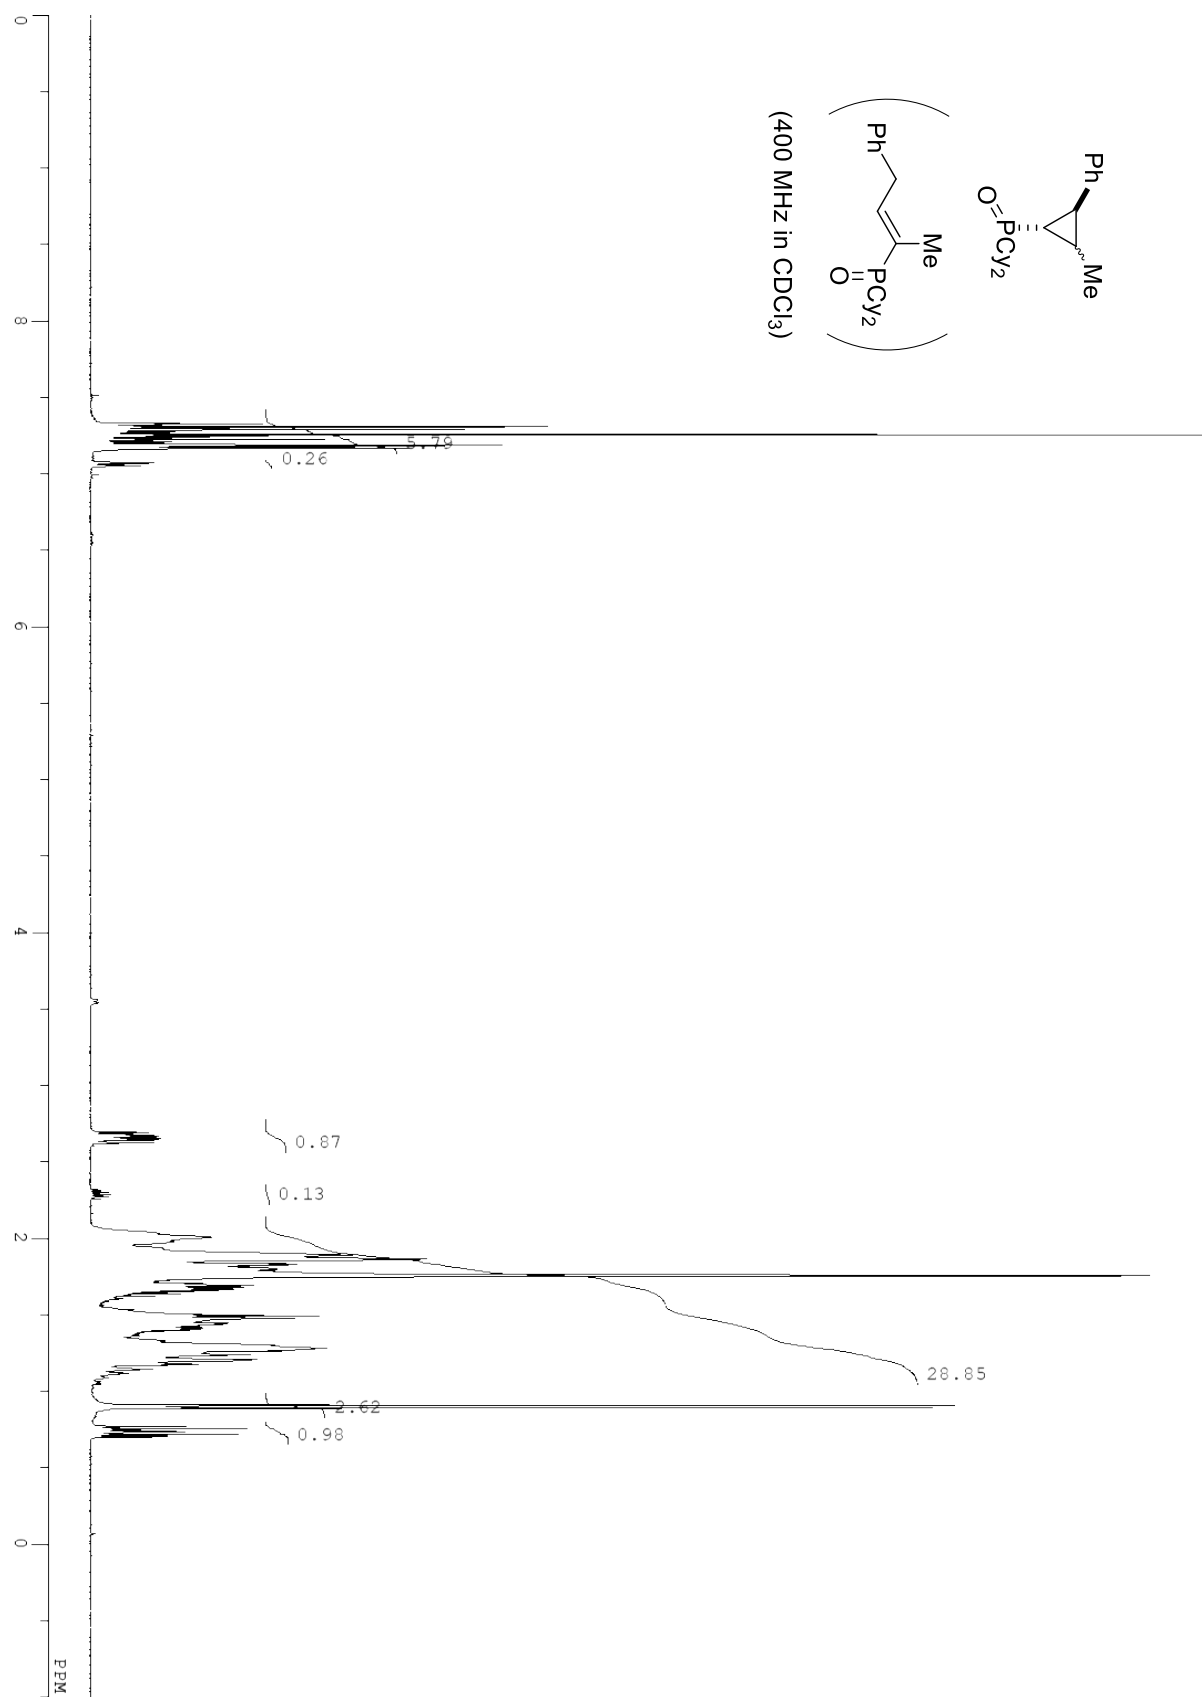

compound 3ma (4ma')

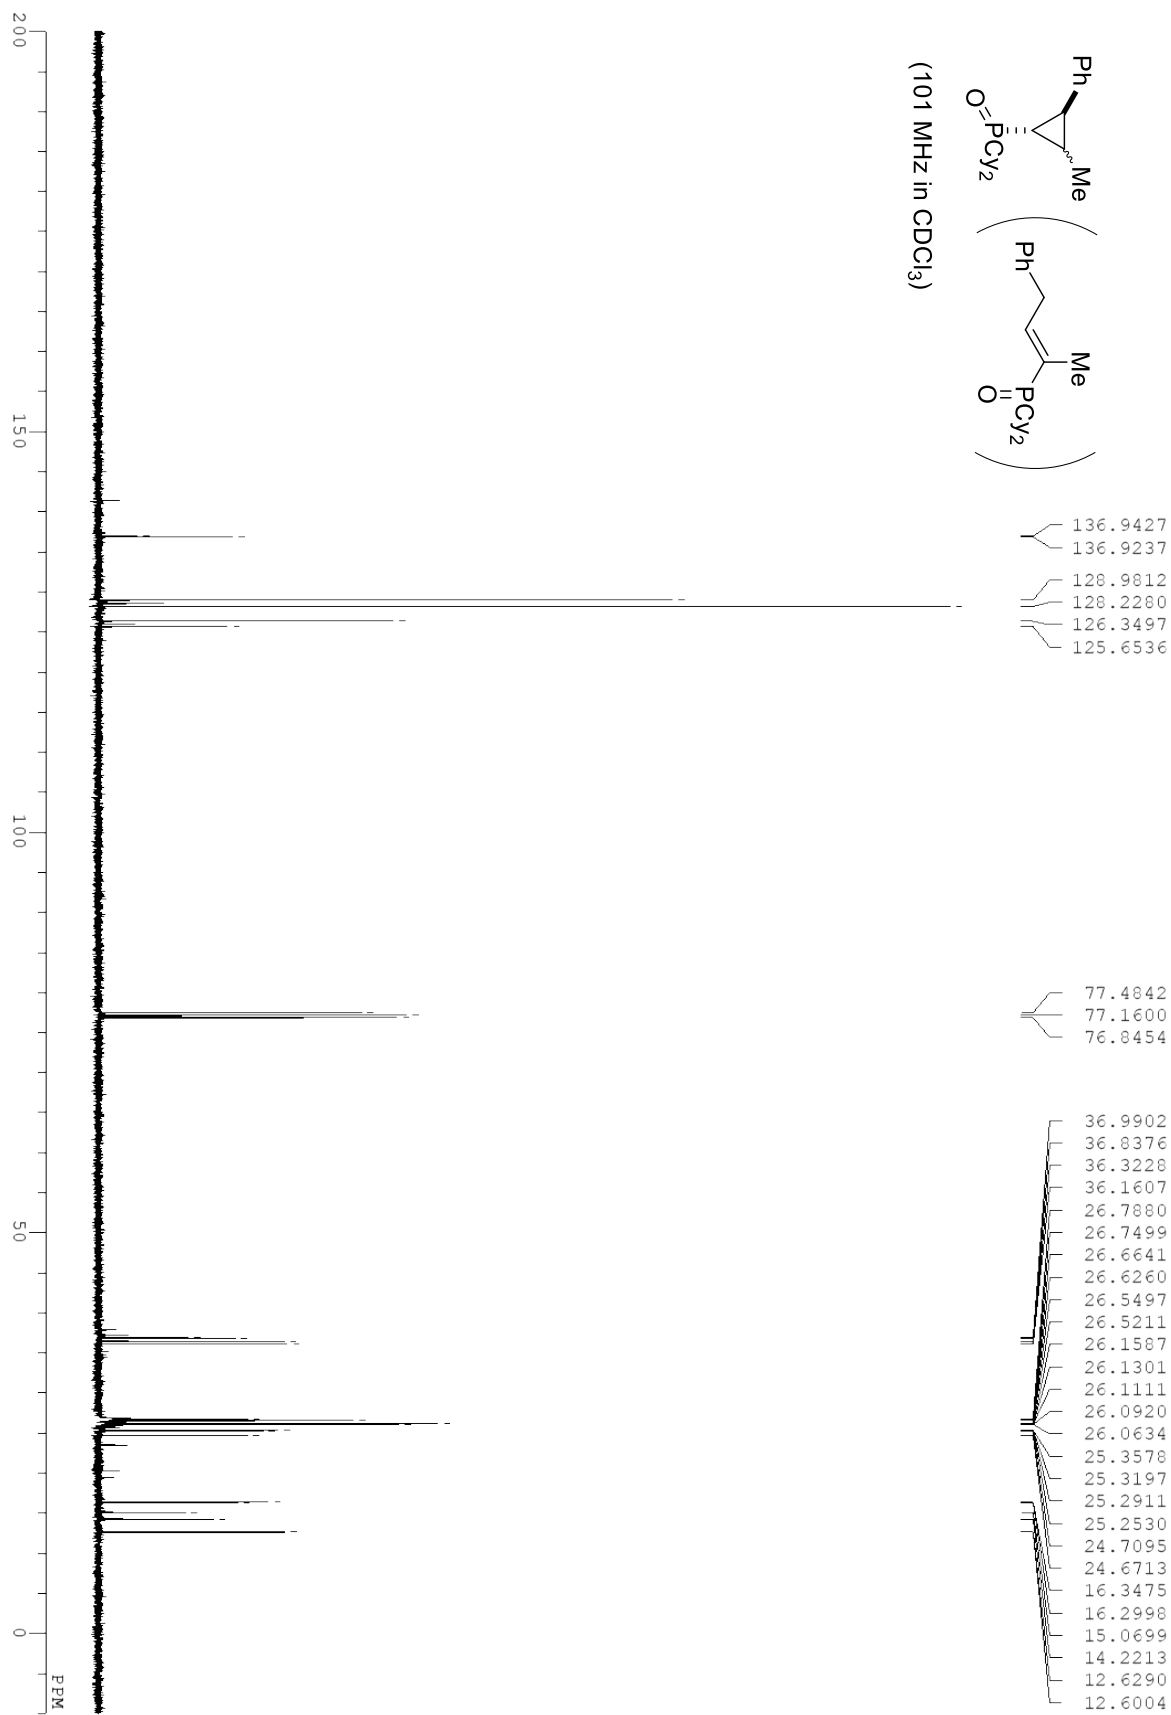

compound **3ma** (**4ma'**) HMQC spectrum (alkyl region)

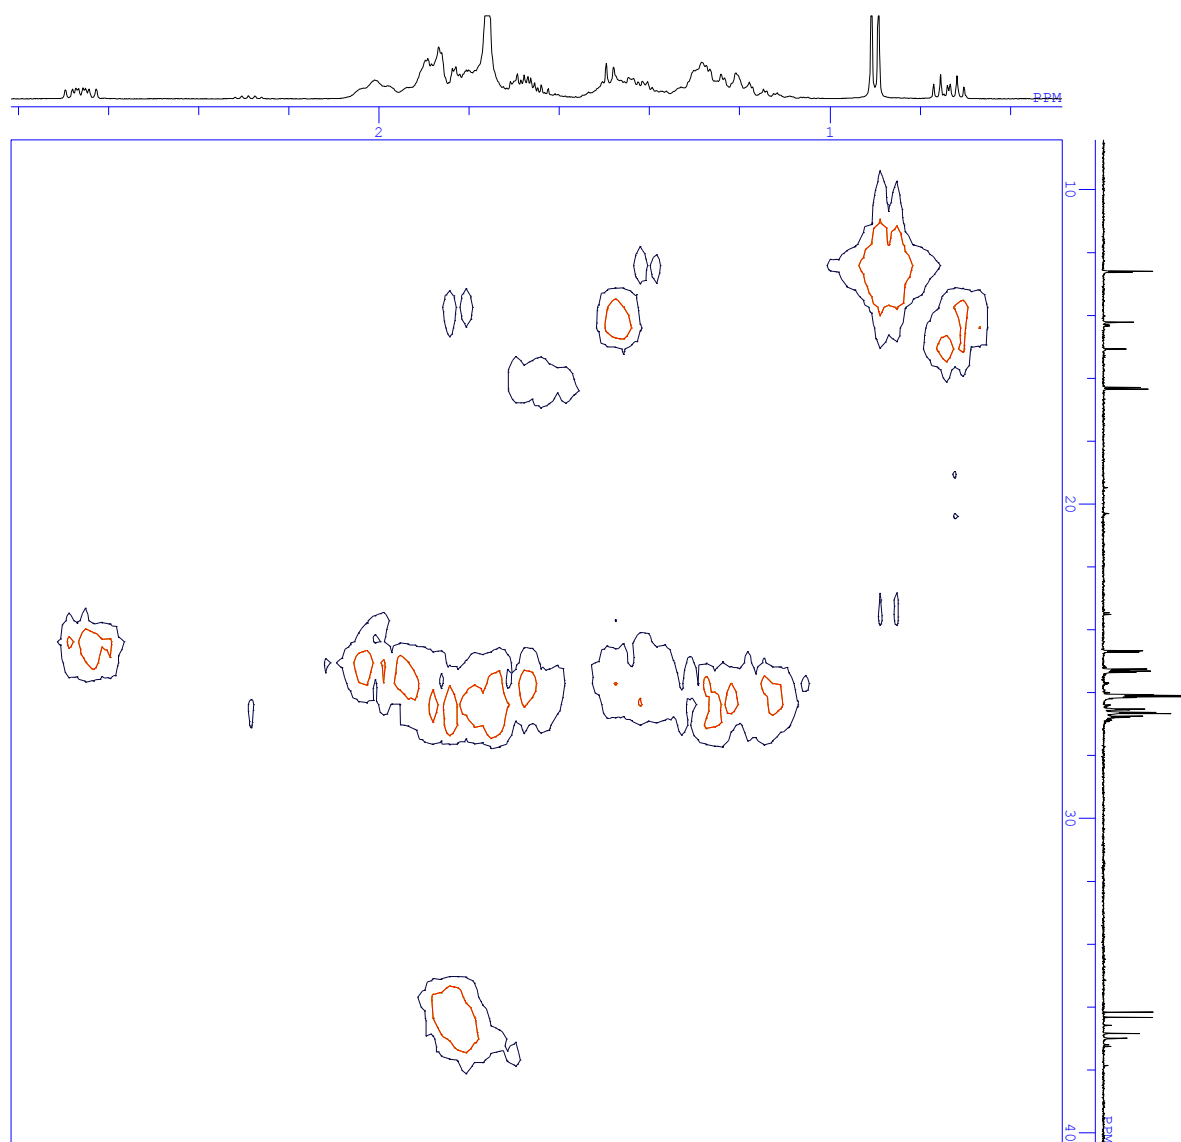



compound **3bb**

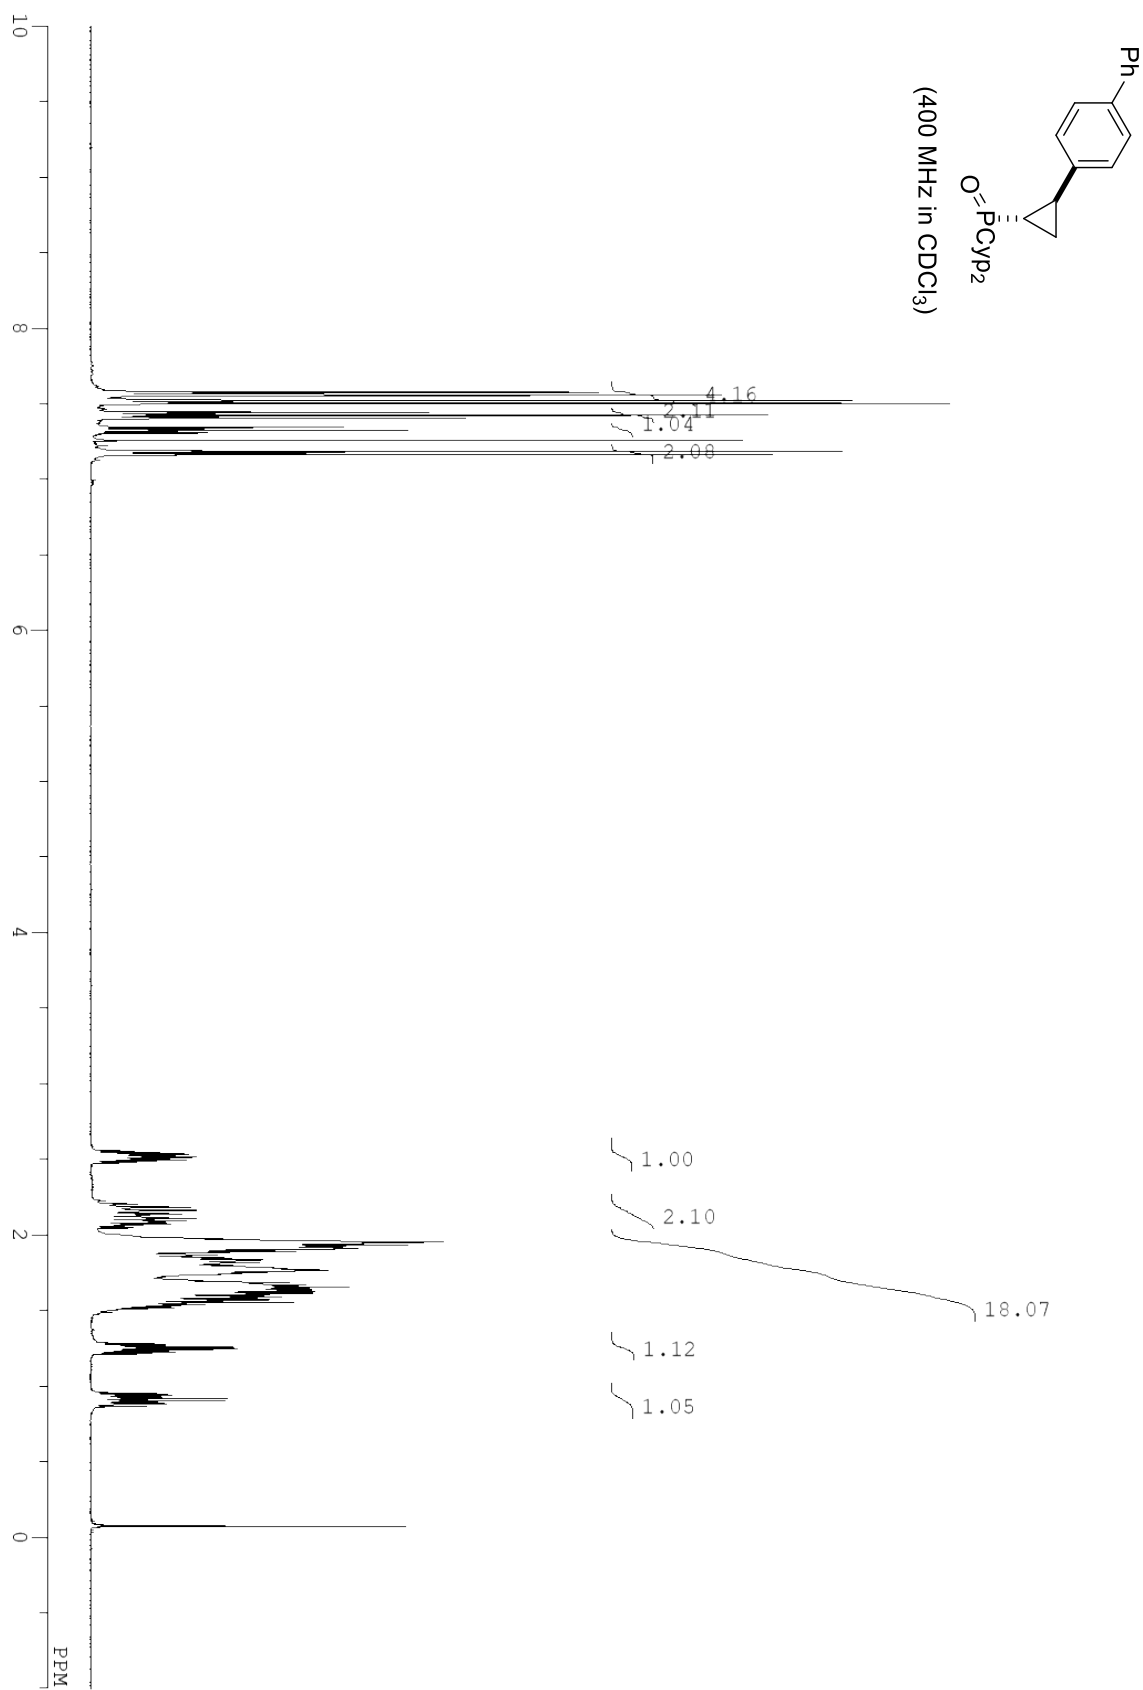

compound **3bb**

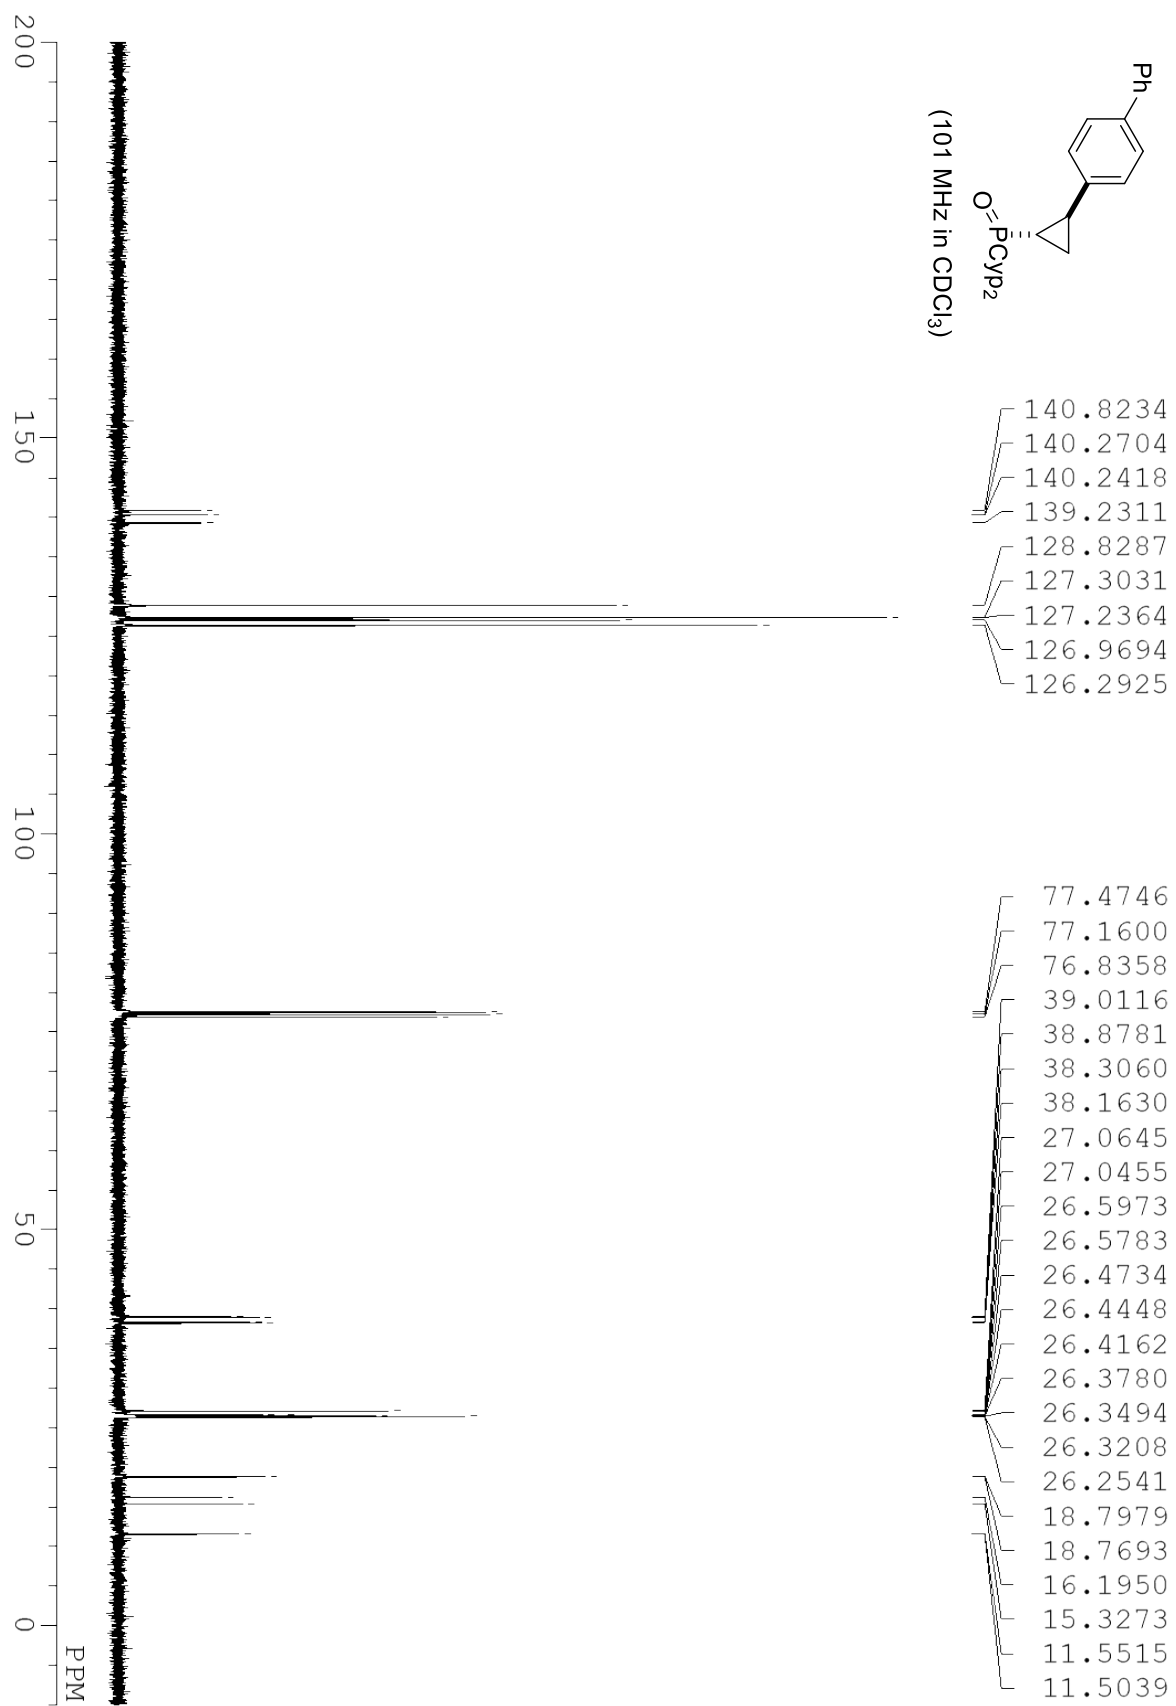

compound **3bc** (**4bc**)

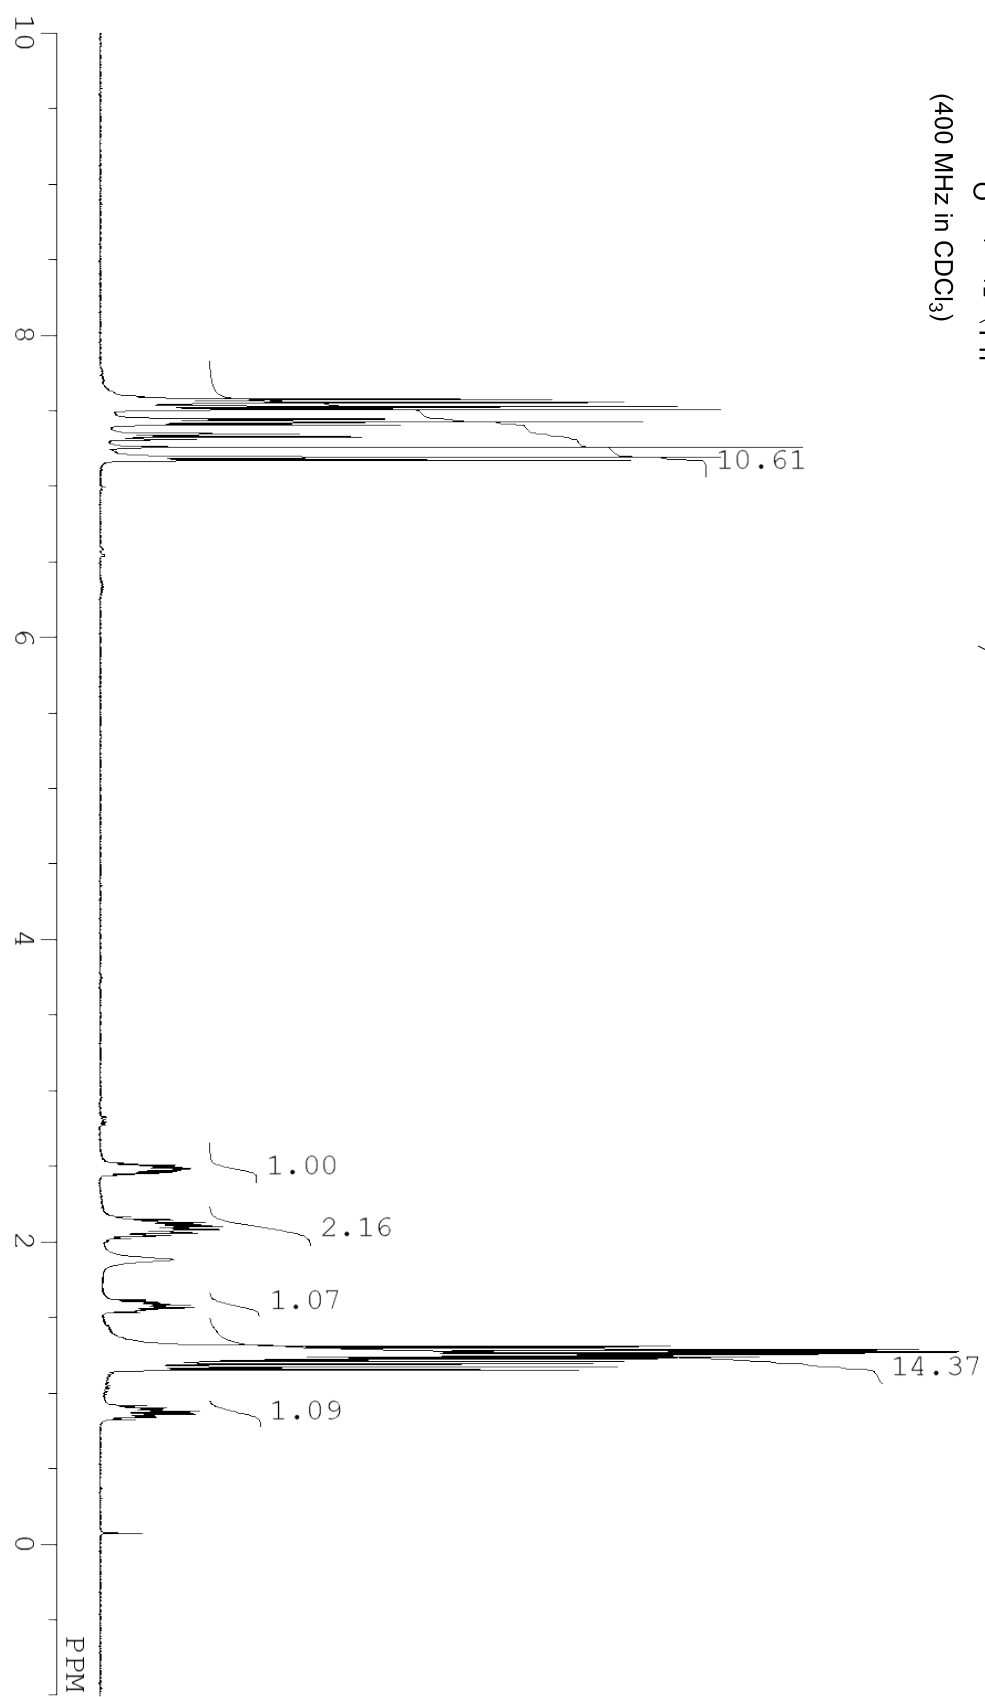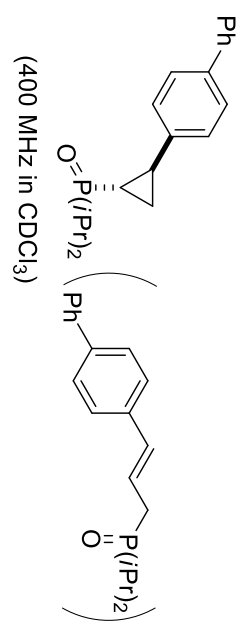

compound **3bc** (**4bc**)

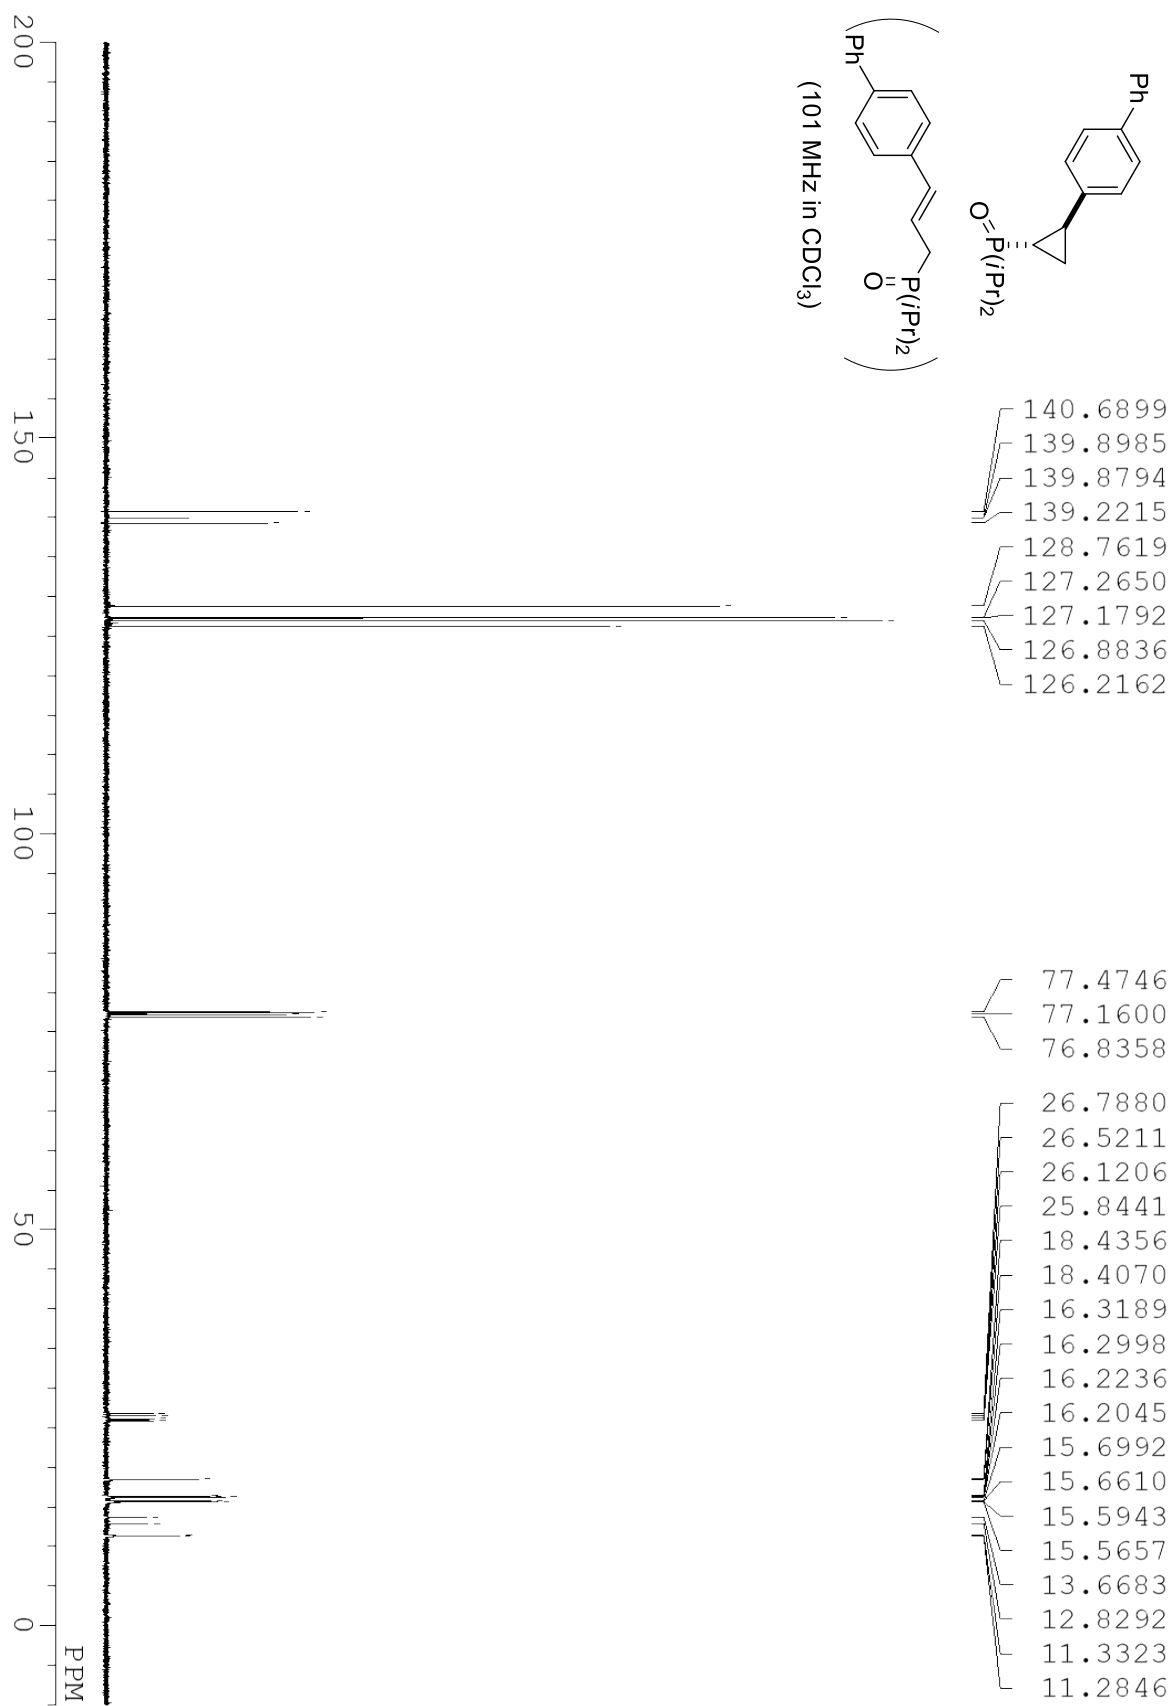

compound **3bd**

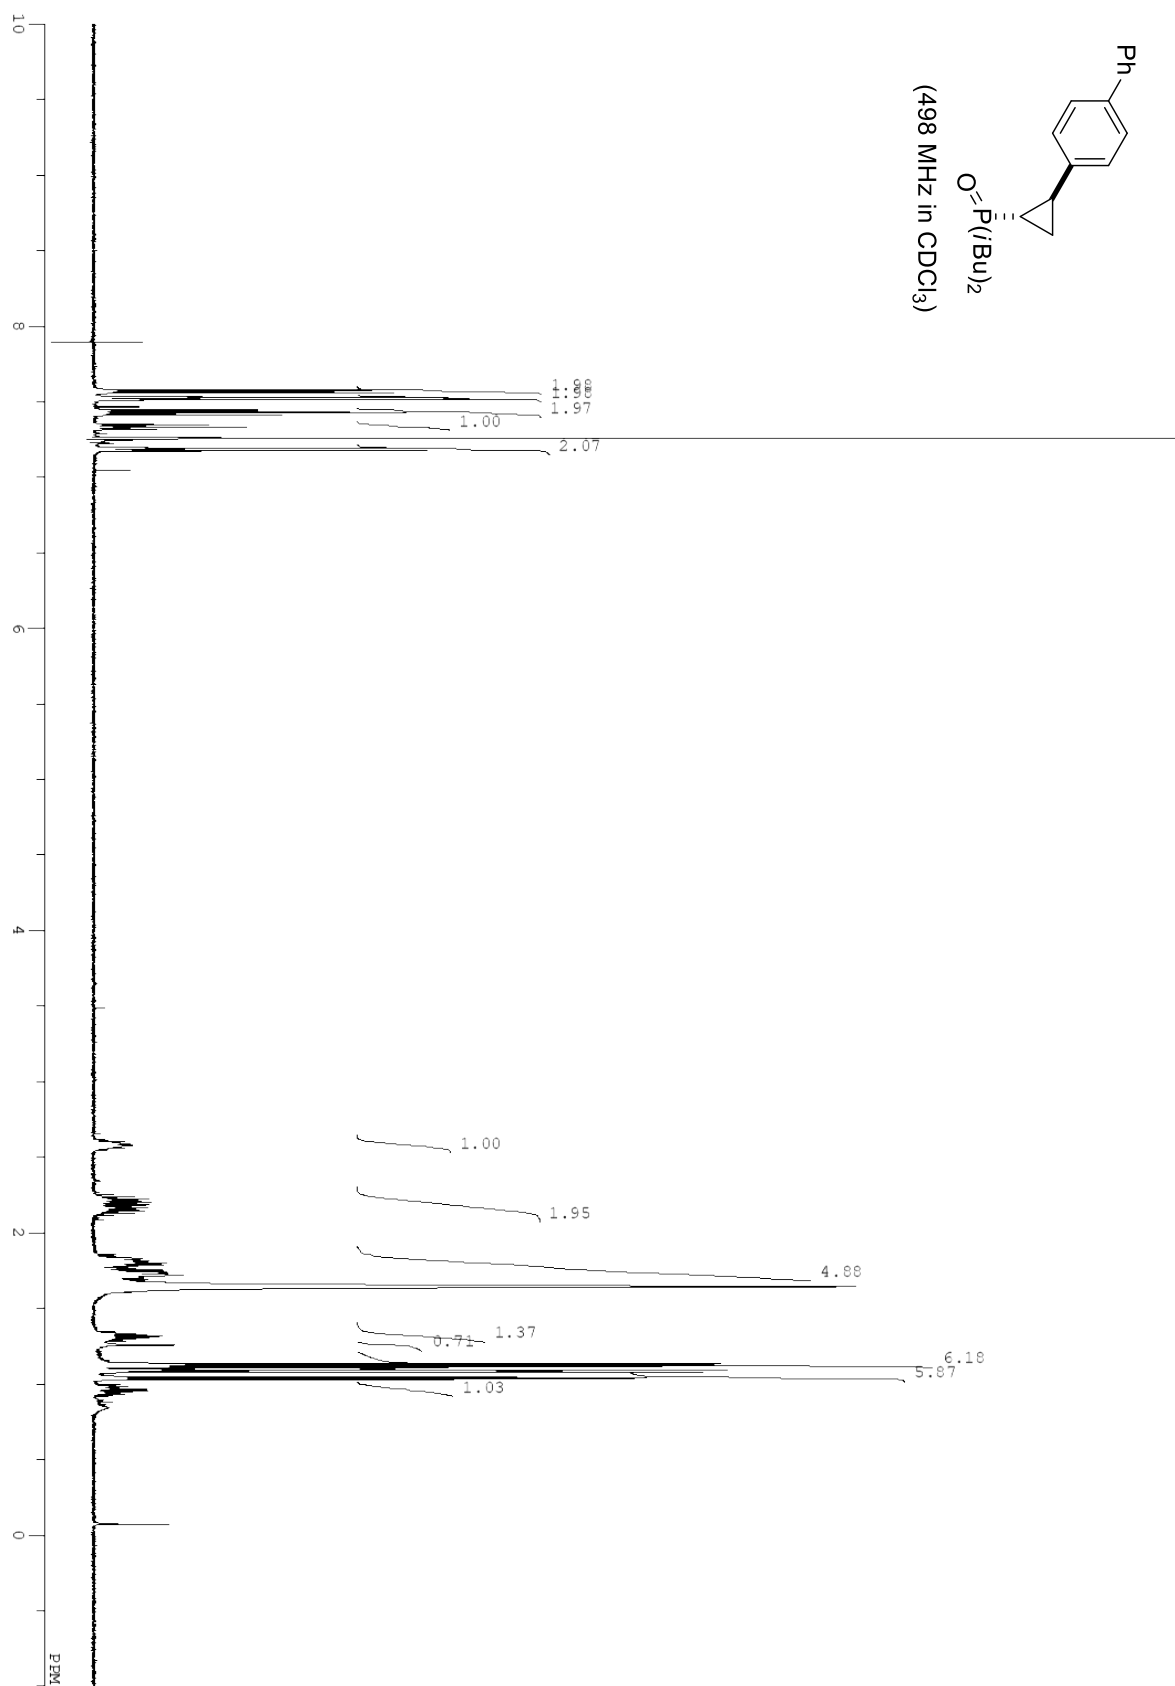

compound 3bd

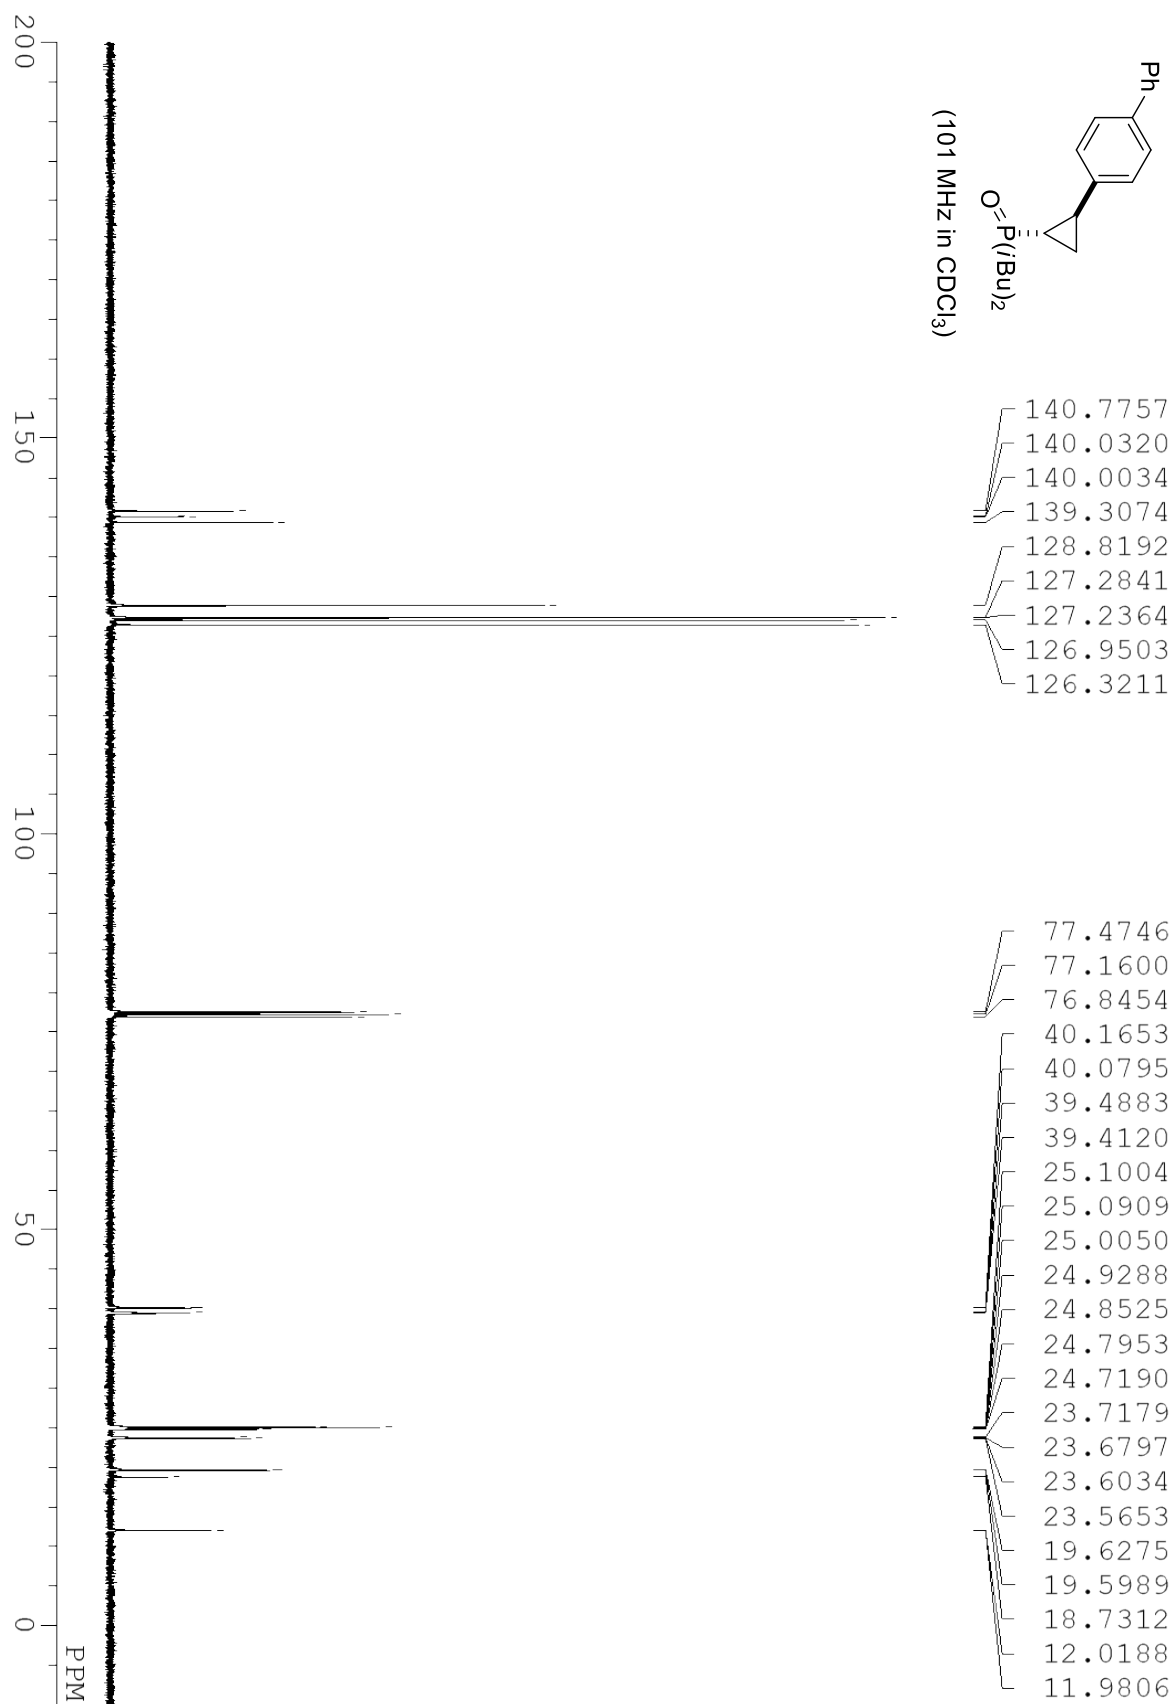

compound **3be** (**4be**)

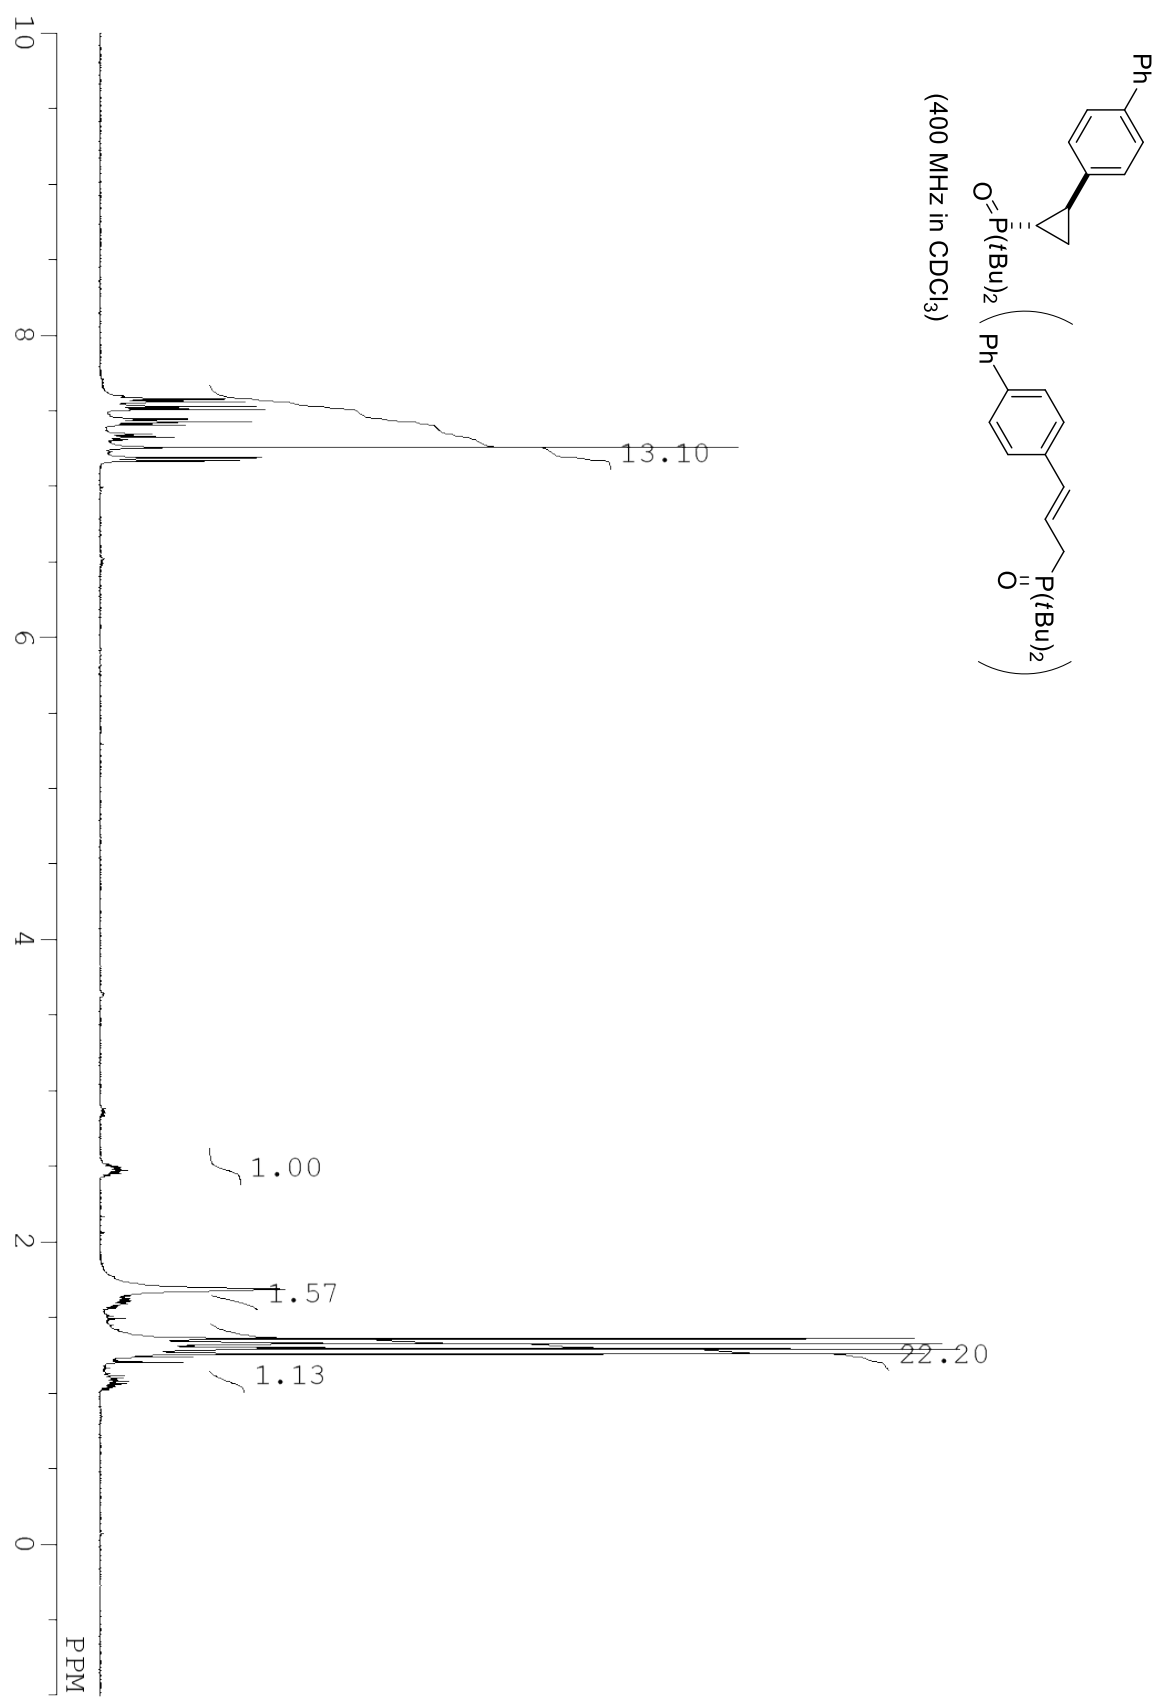

compound 3be (4be)

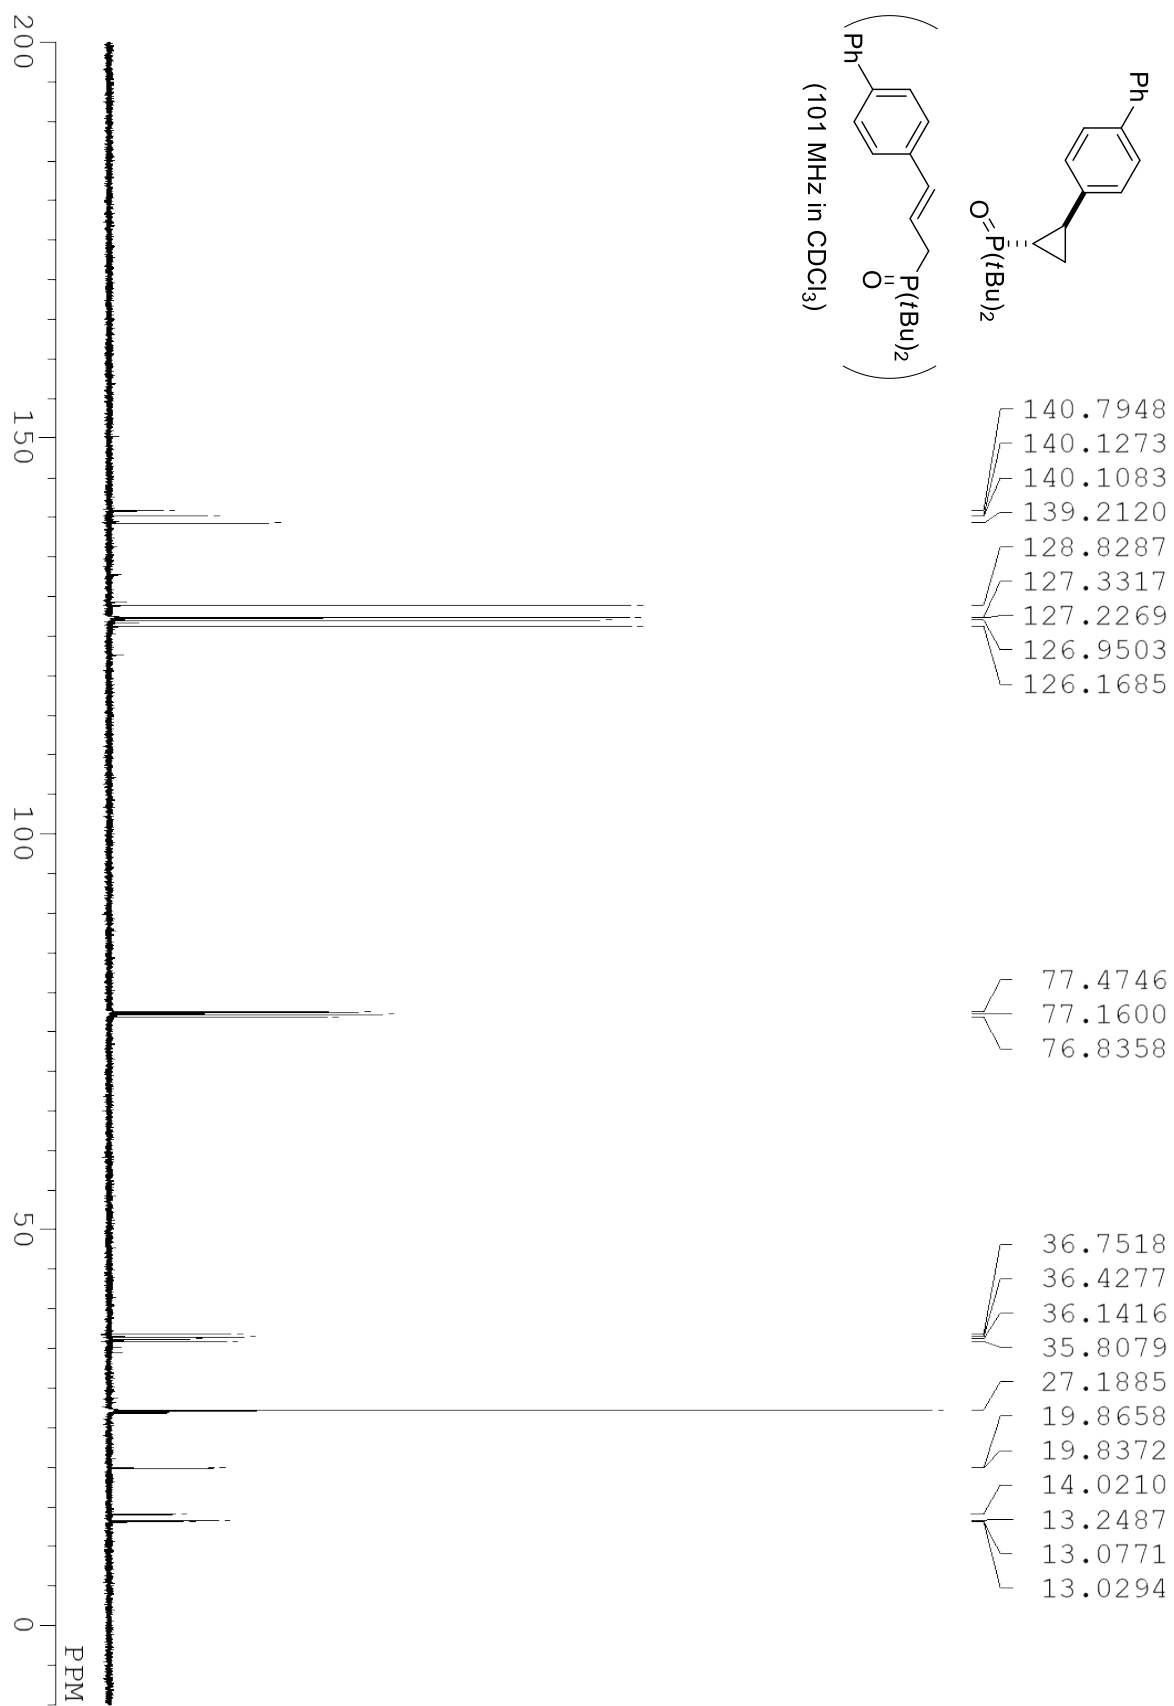



compound **4bf**

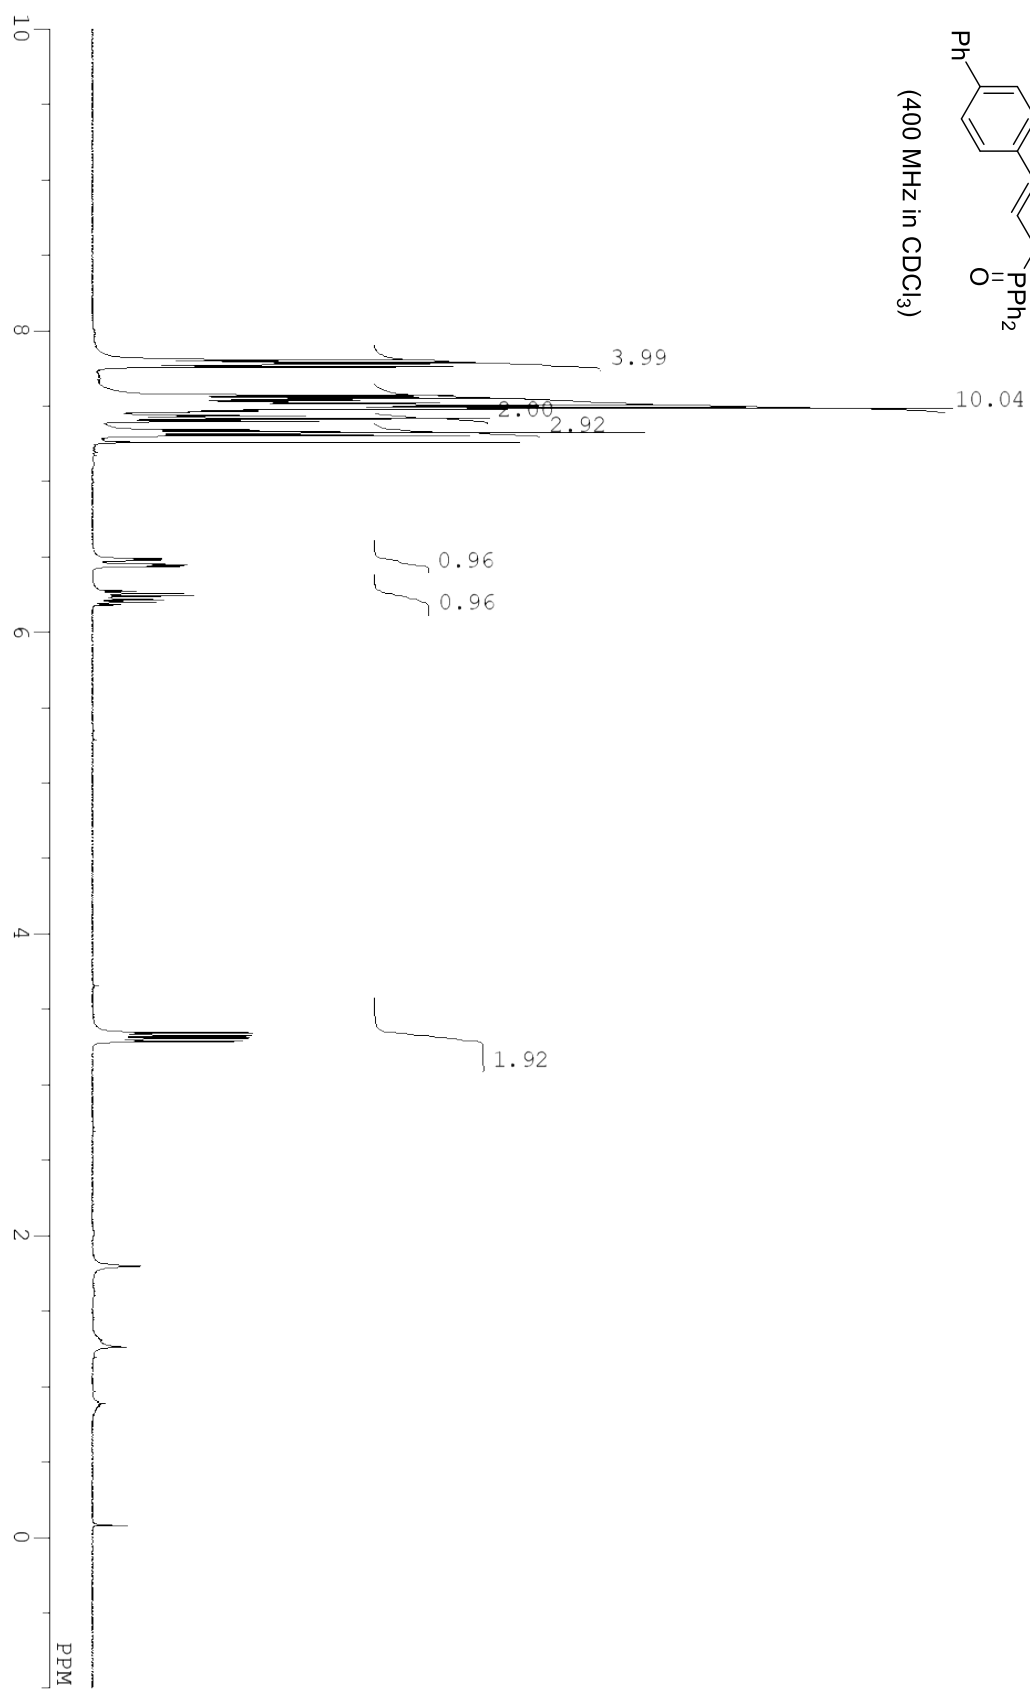

compound **4bf**

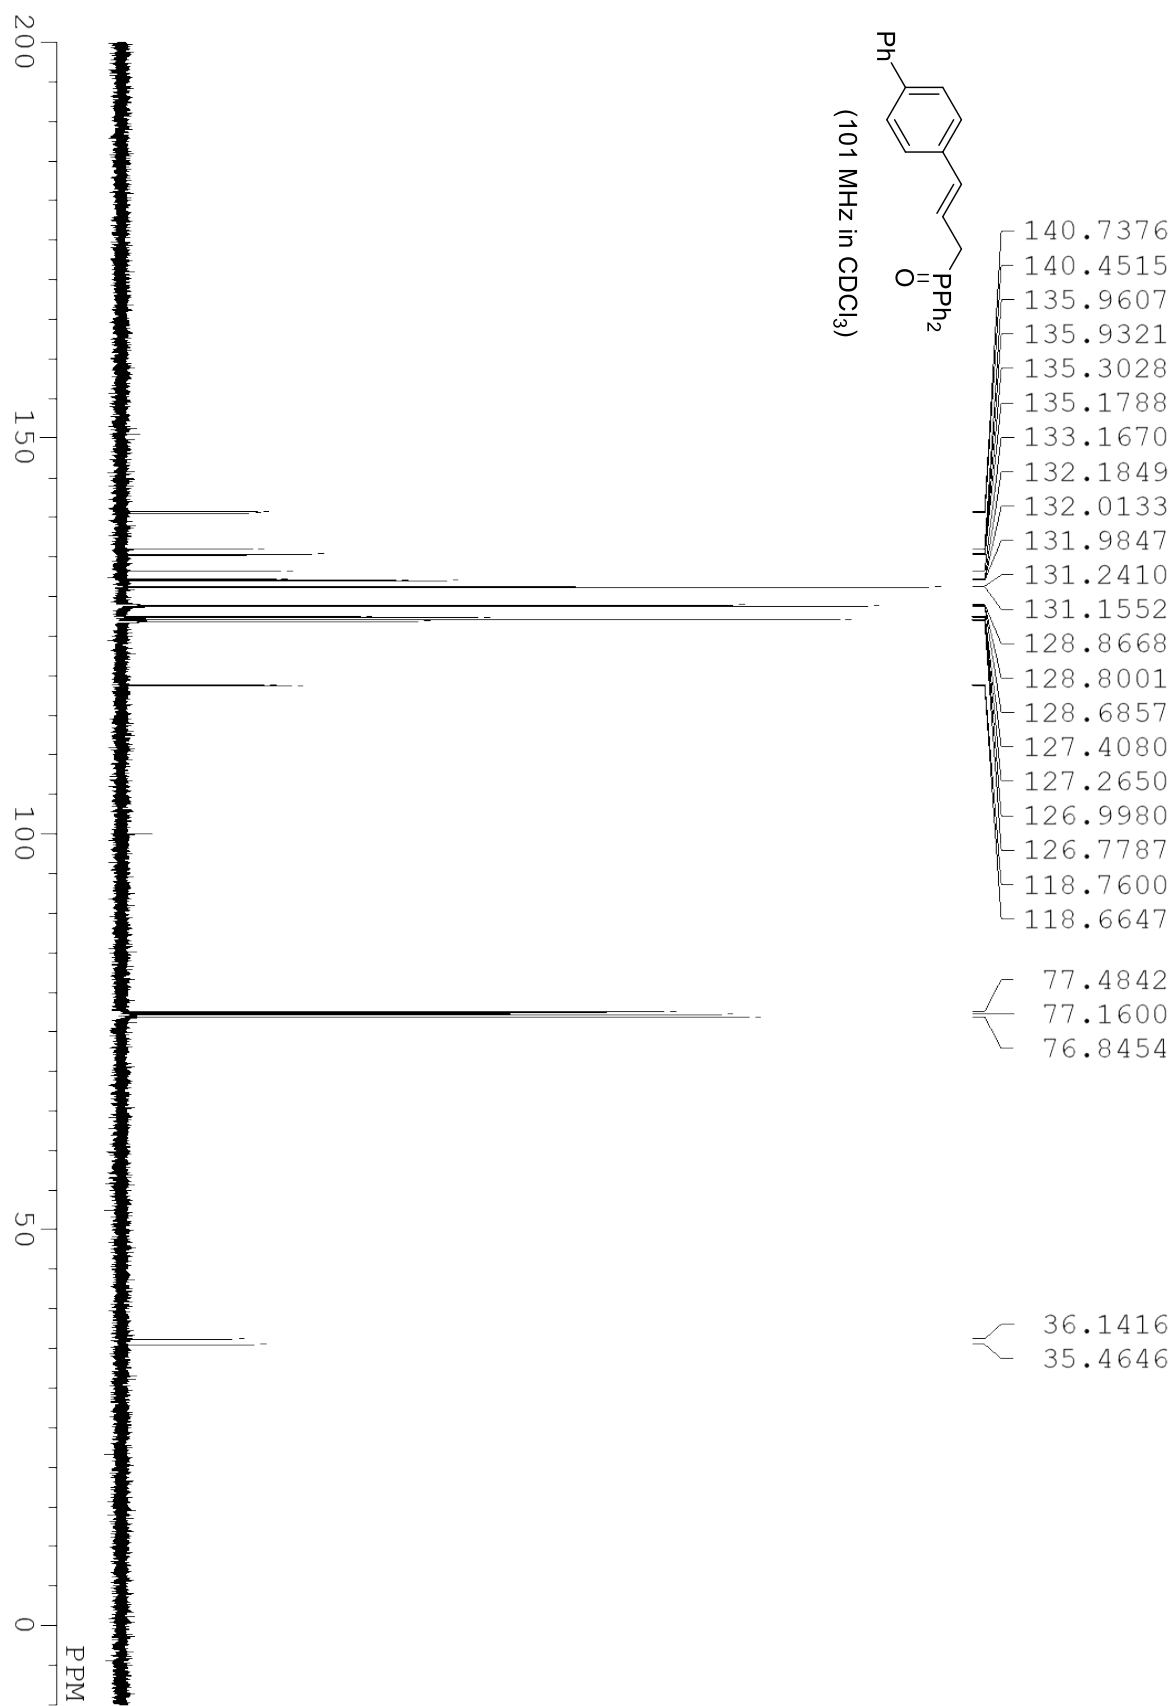

compound **3nf**

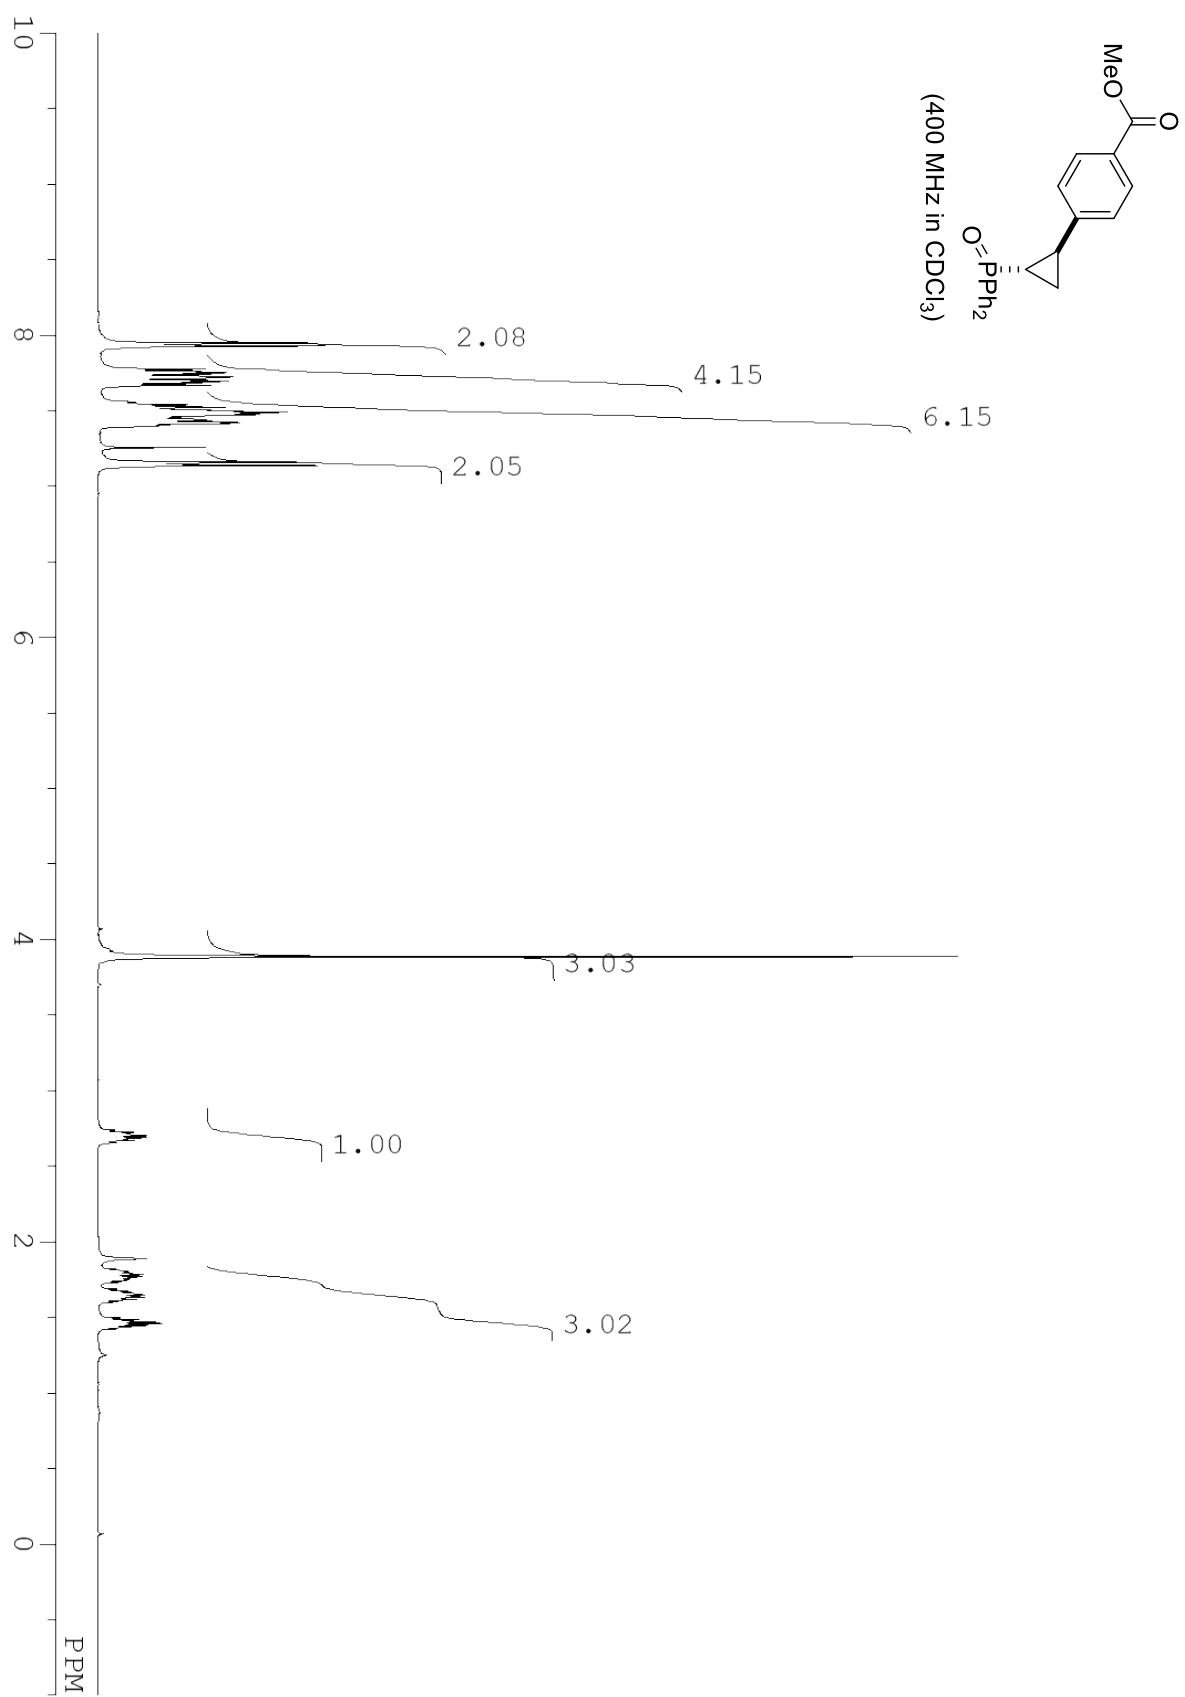

compound 3nf

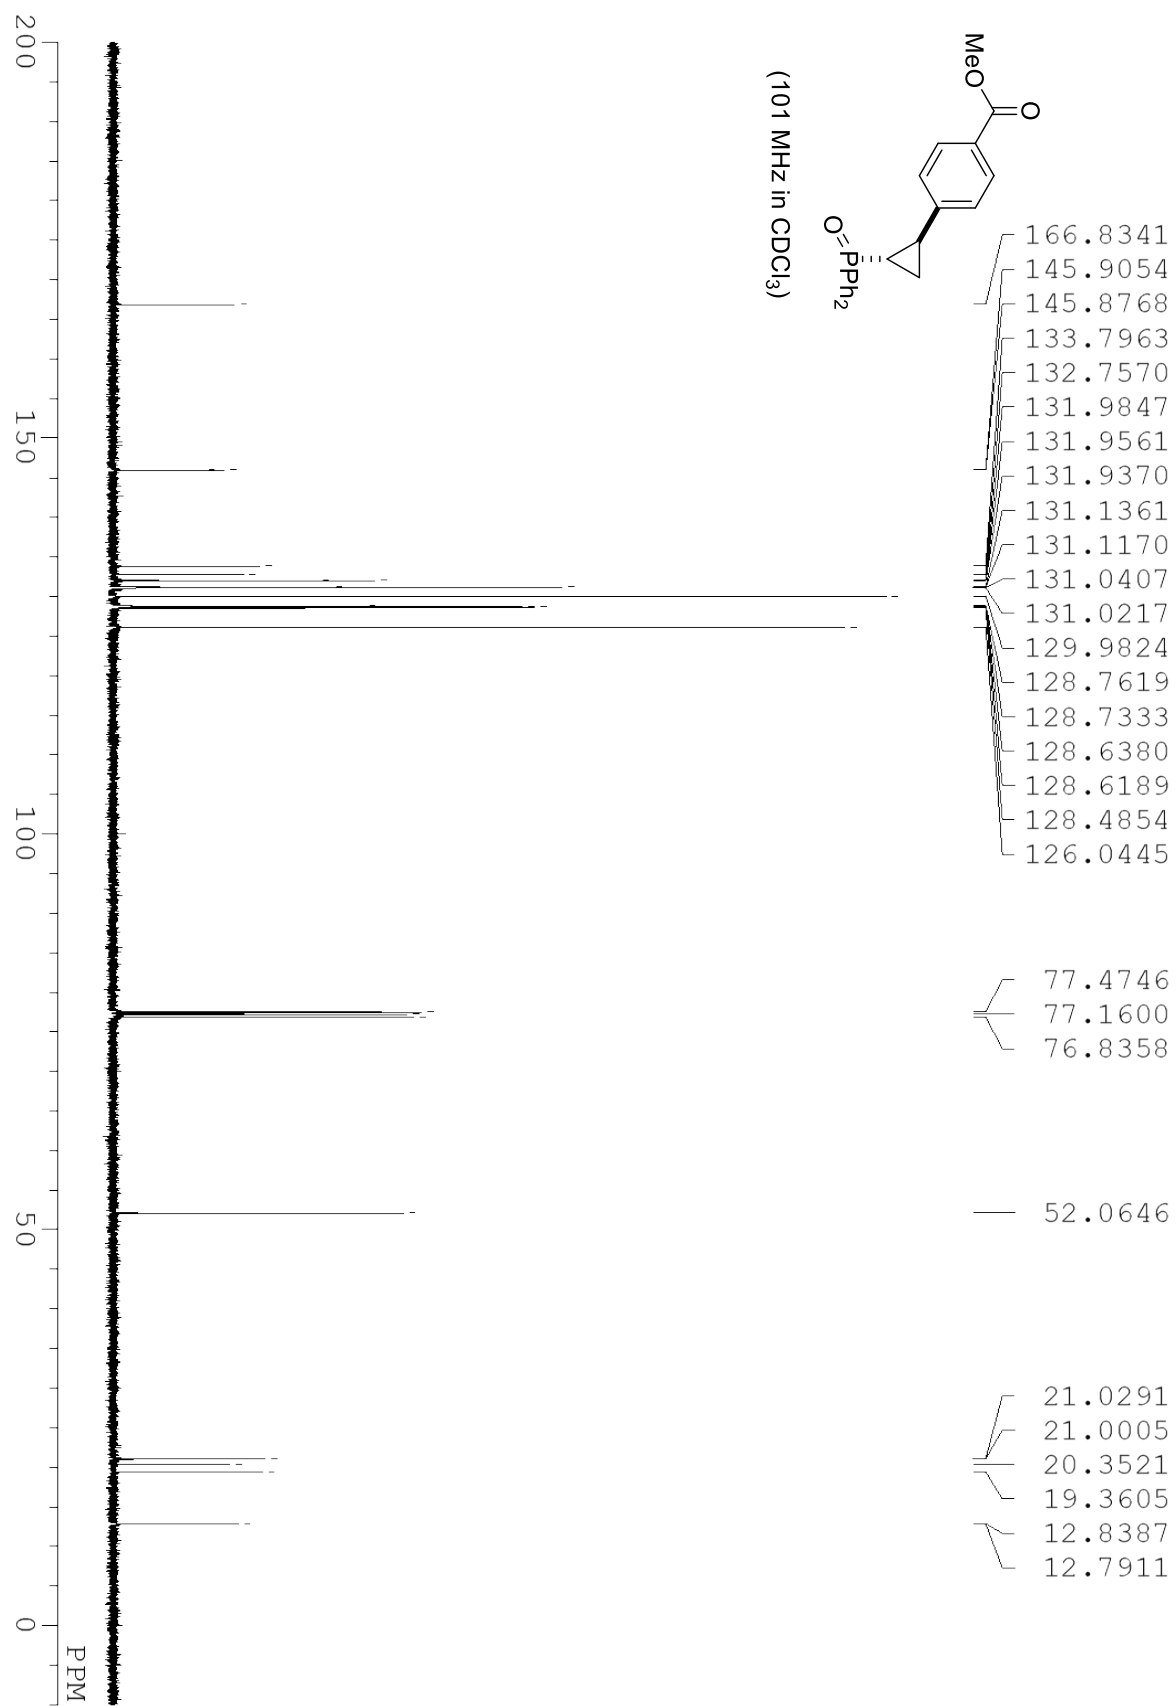

compound *trans*-3ad

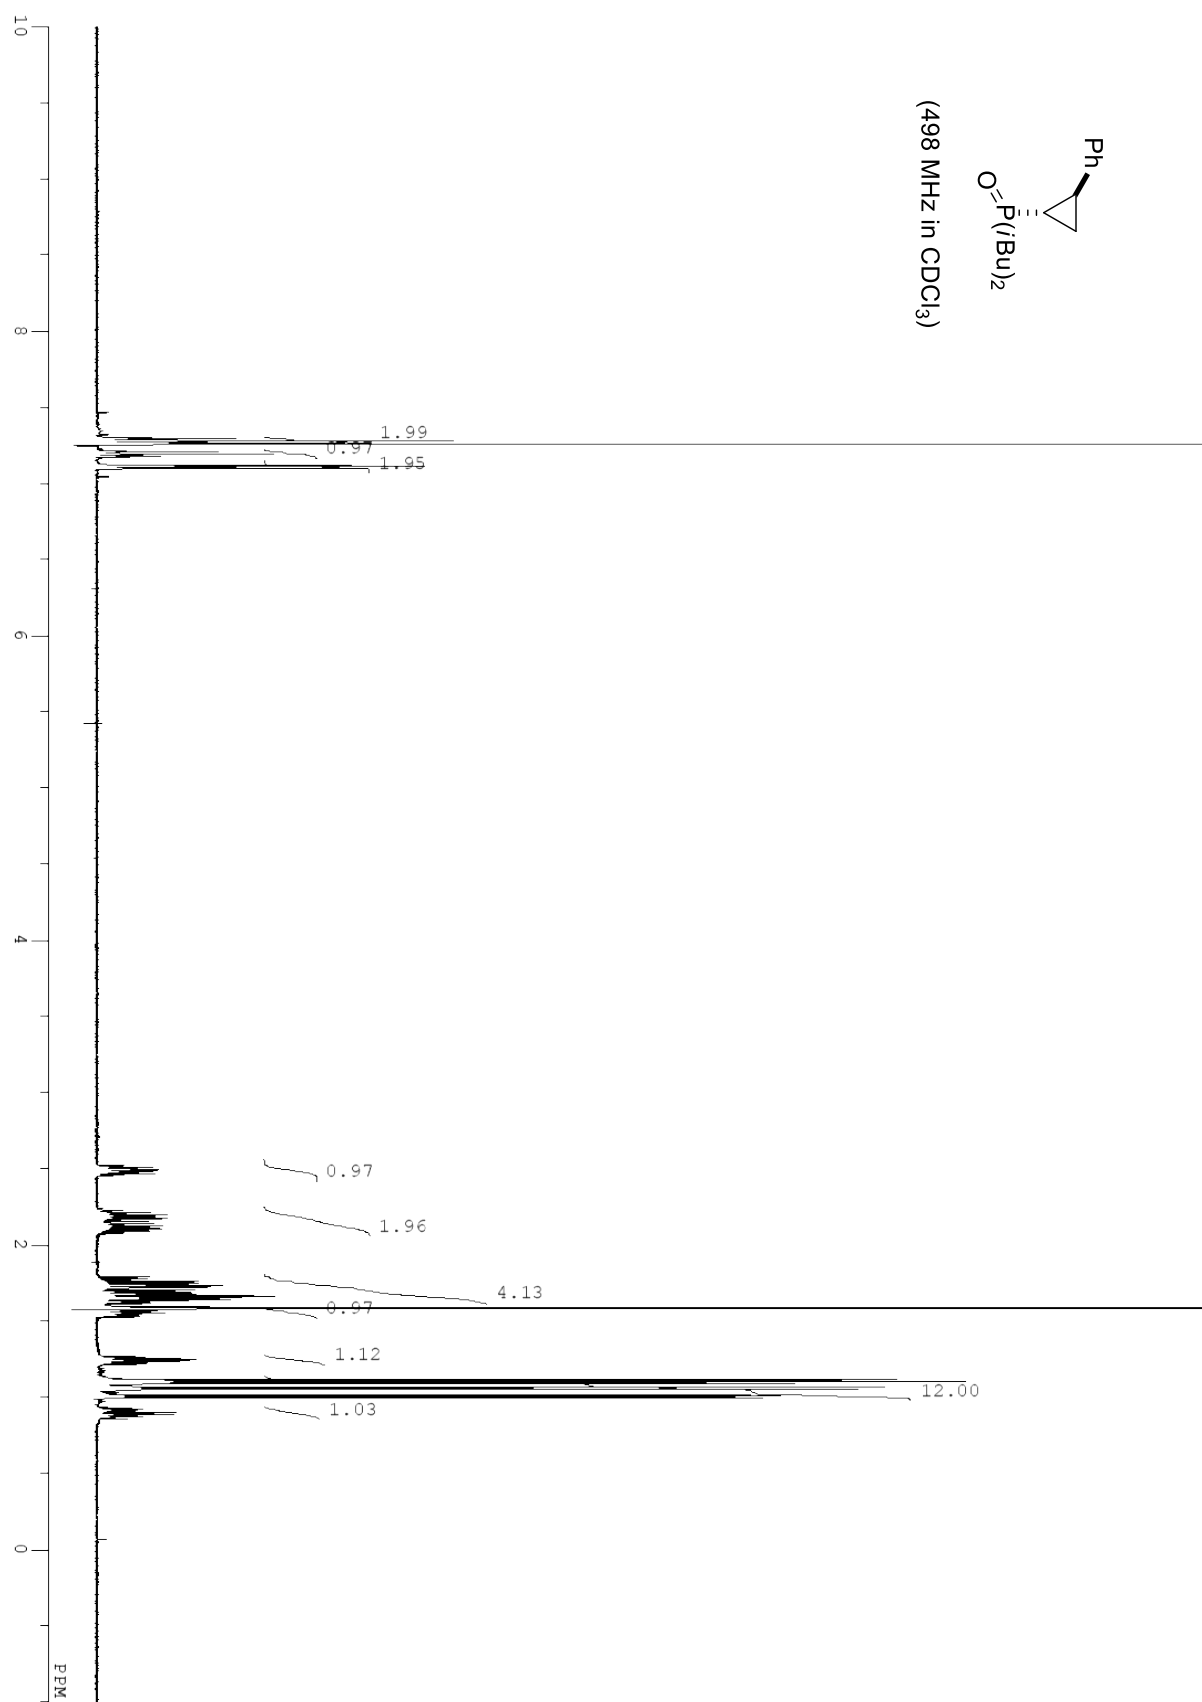

compound *trans*-3ad

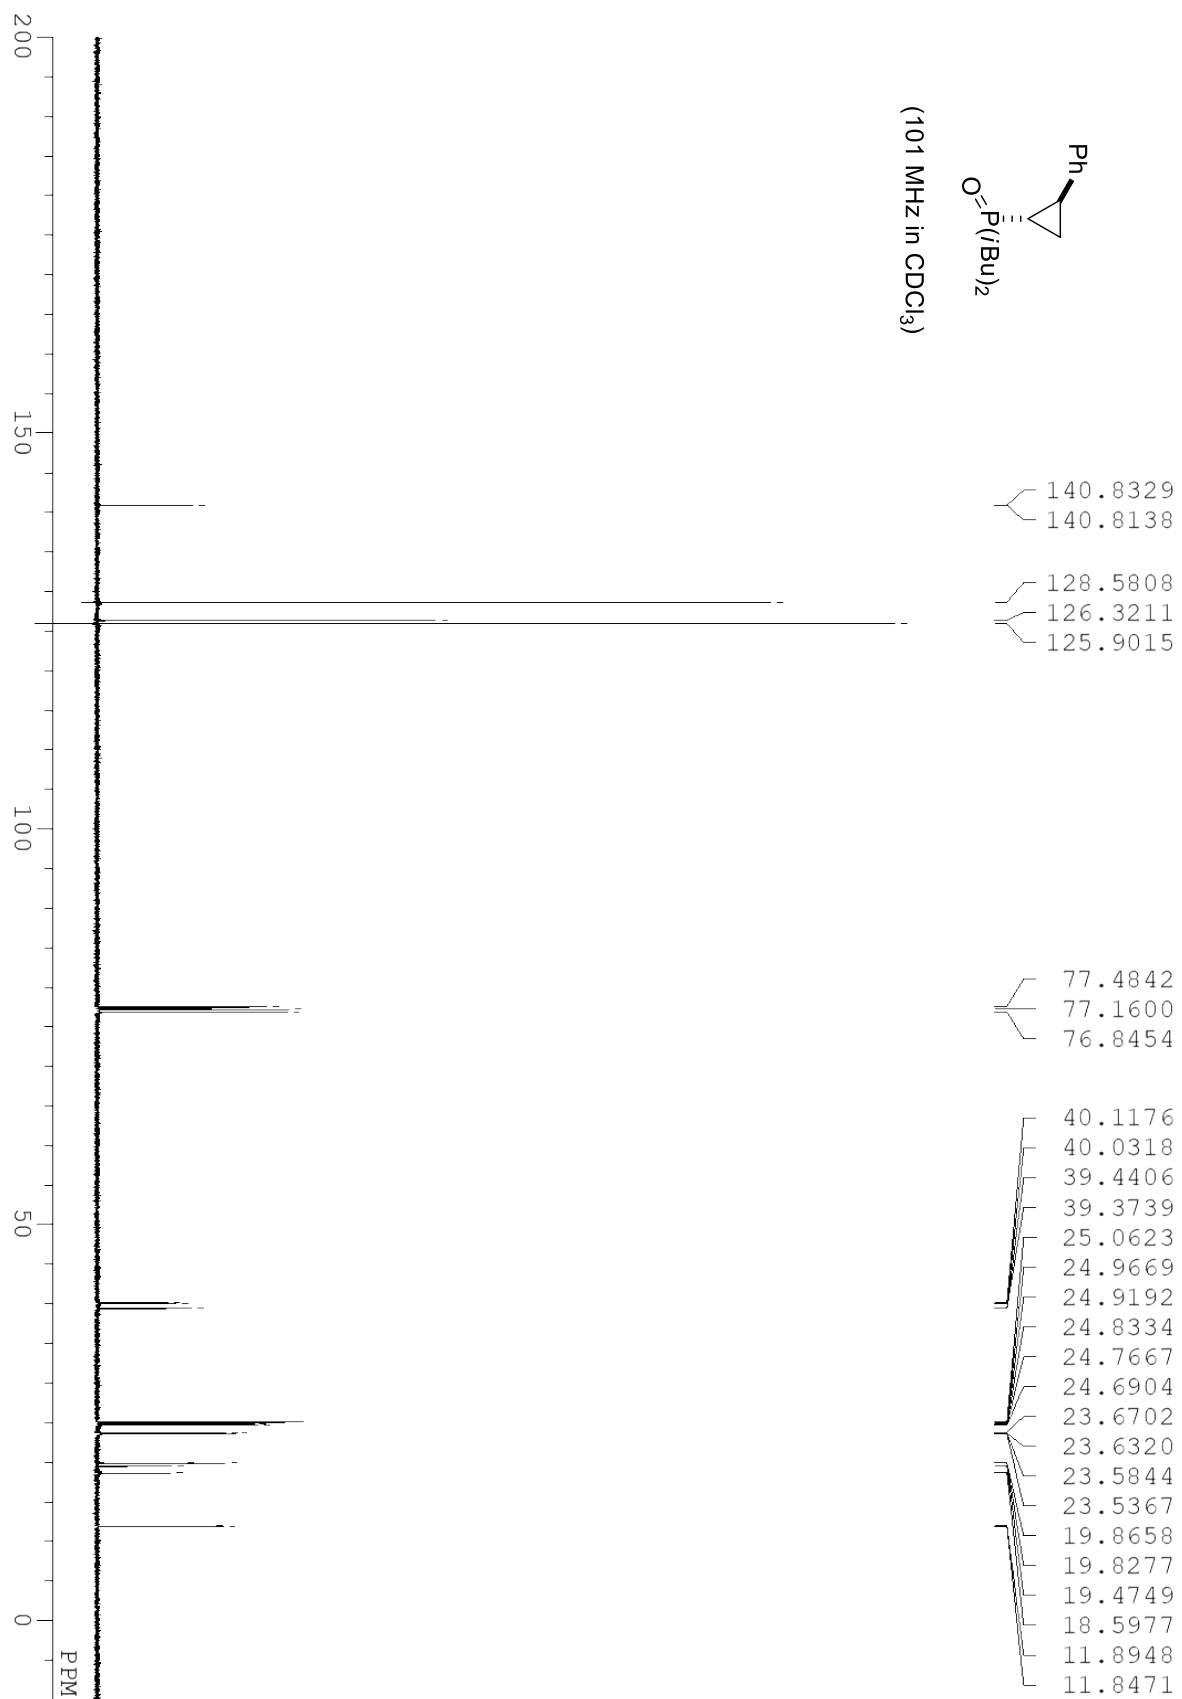

compound *cis-3ad*

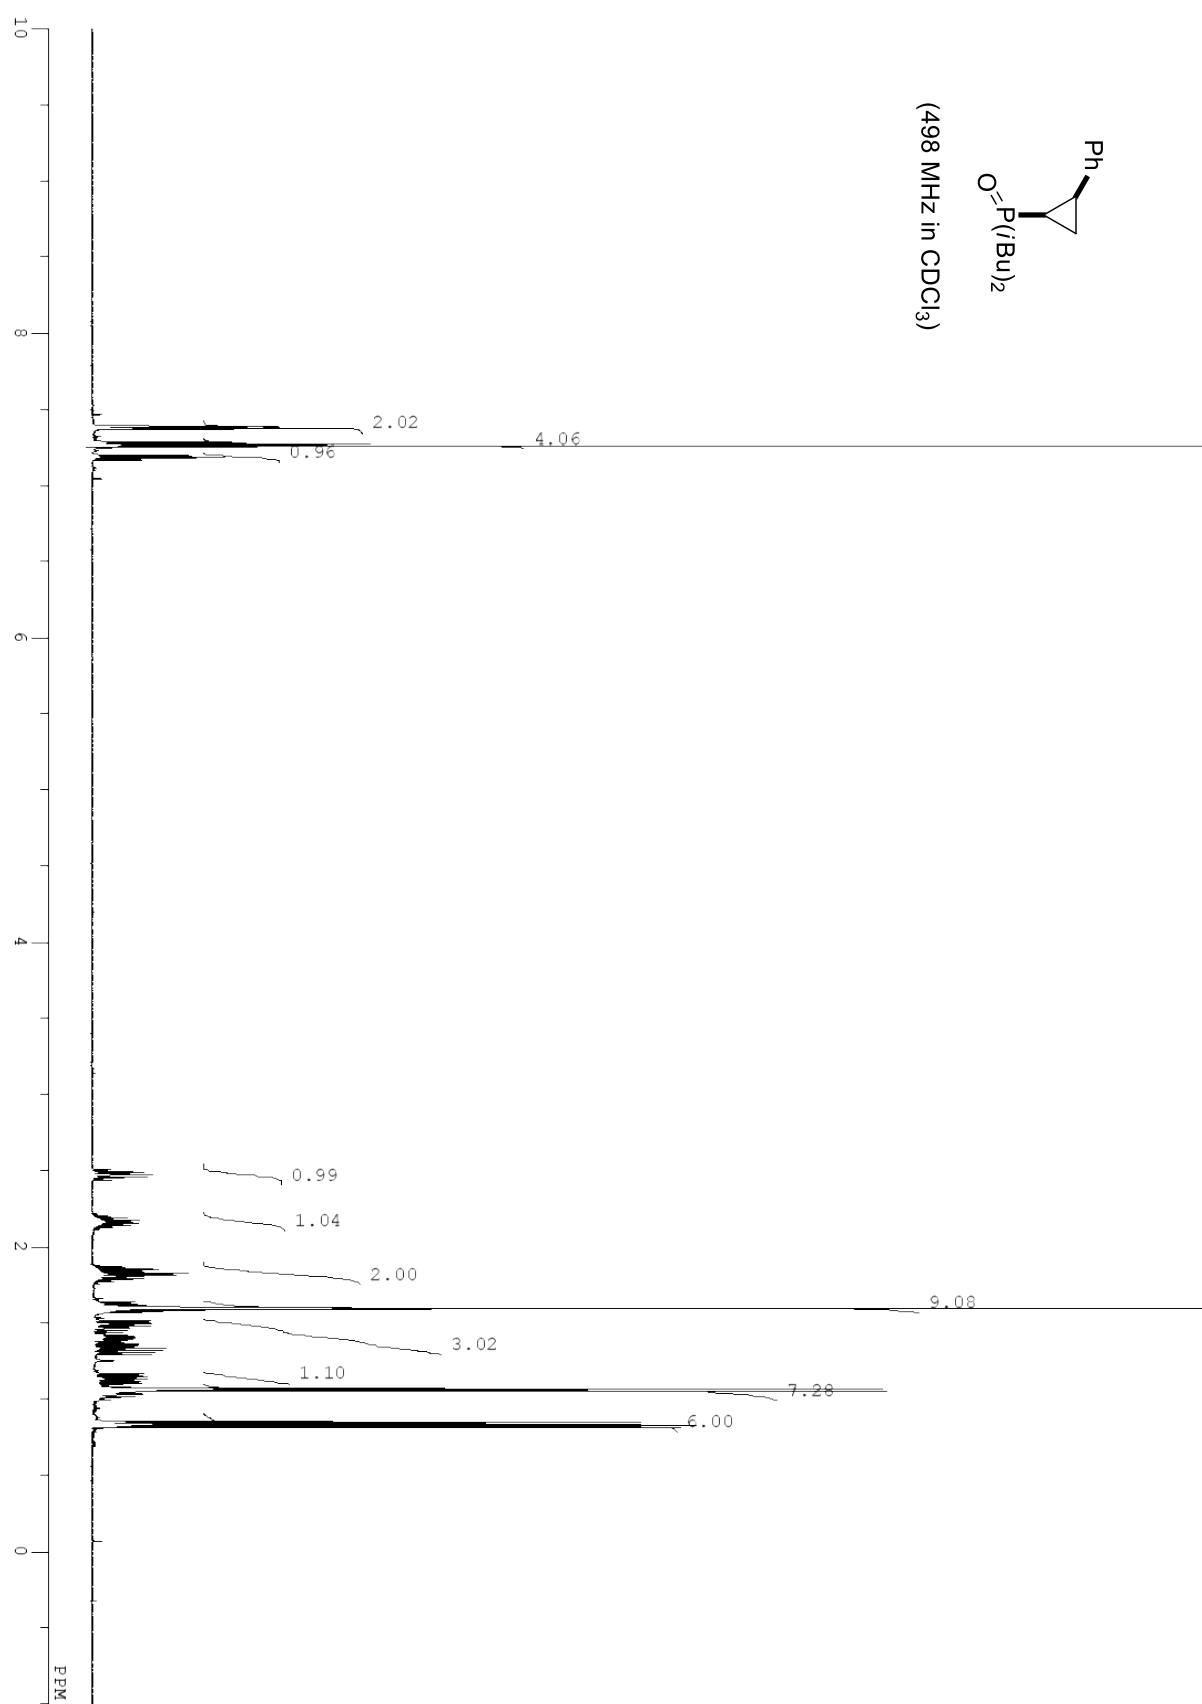

compound *cis-3ad*

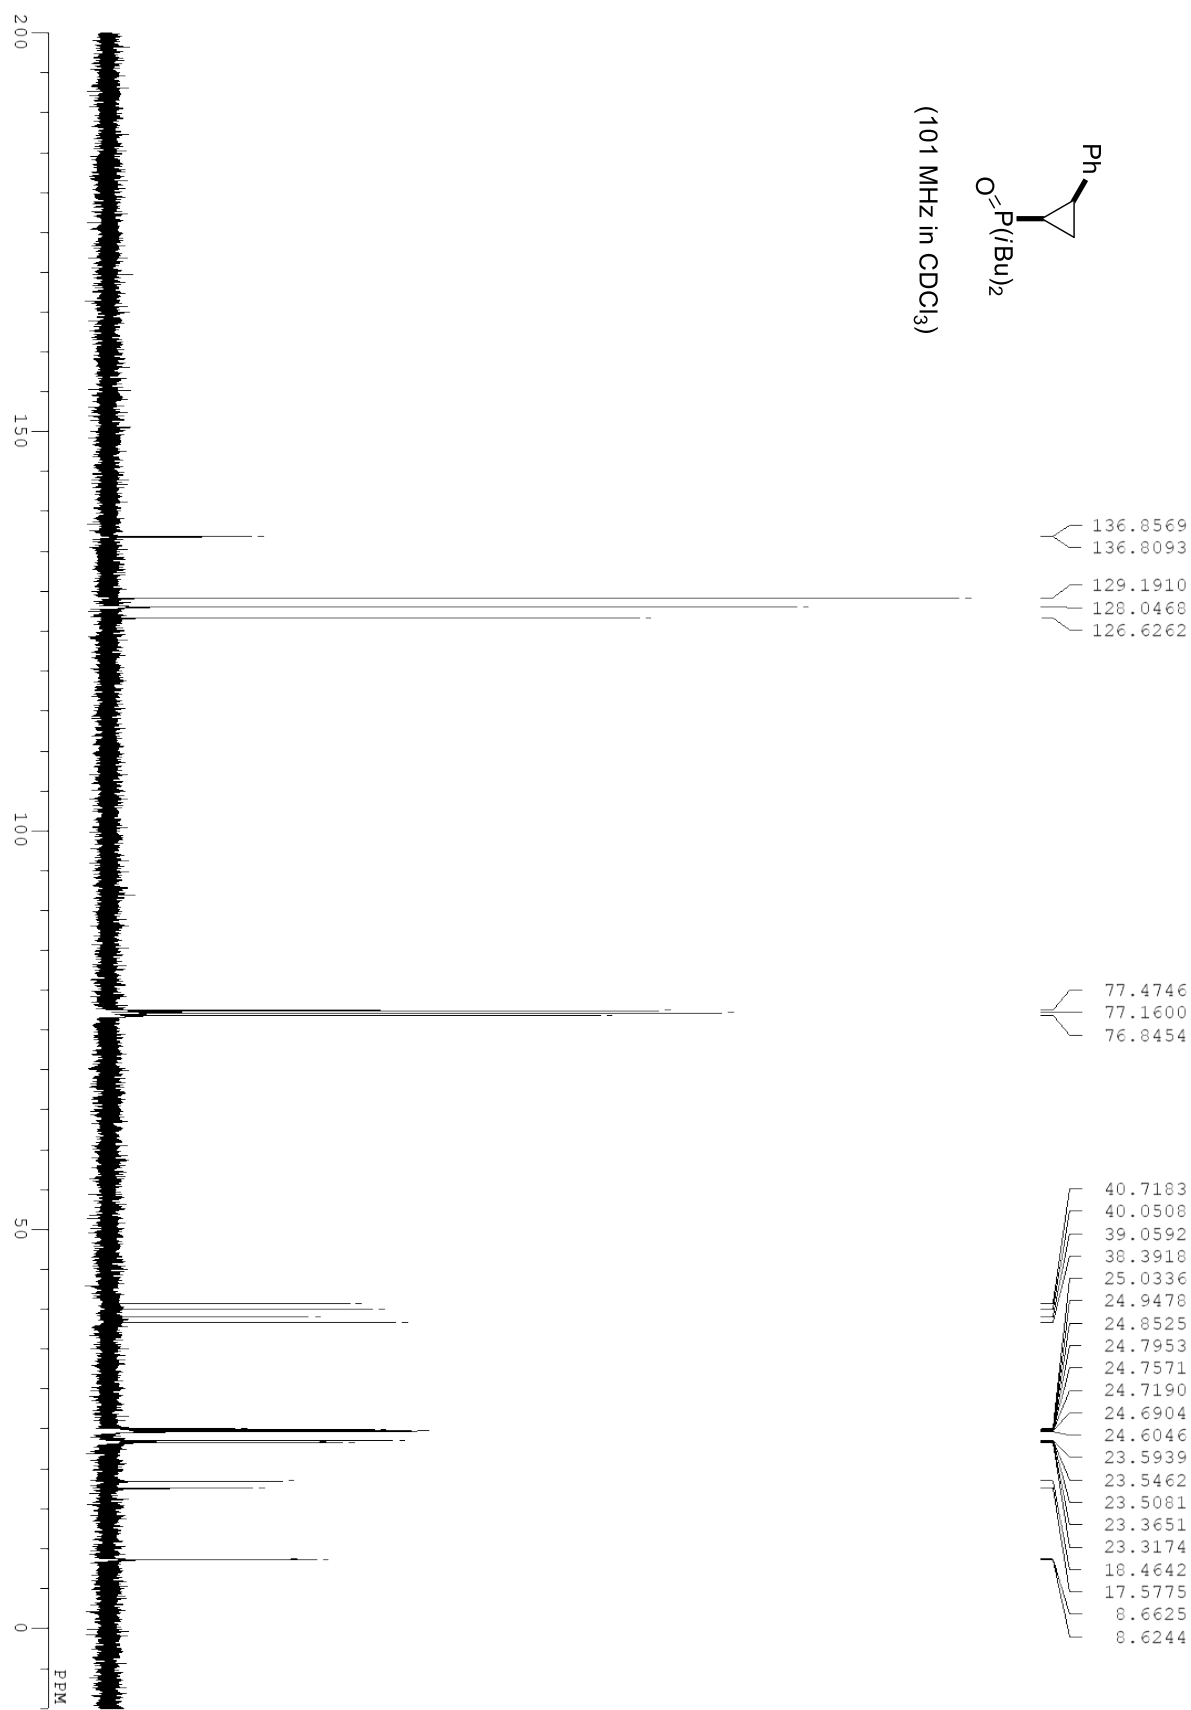



compound S1 (S2)

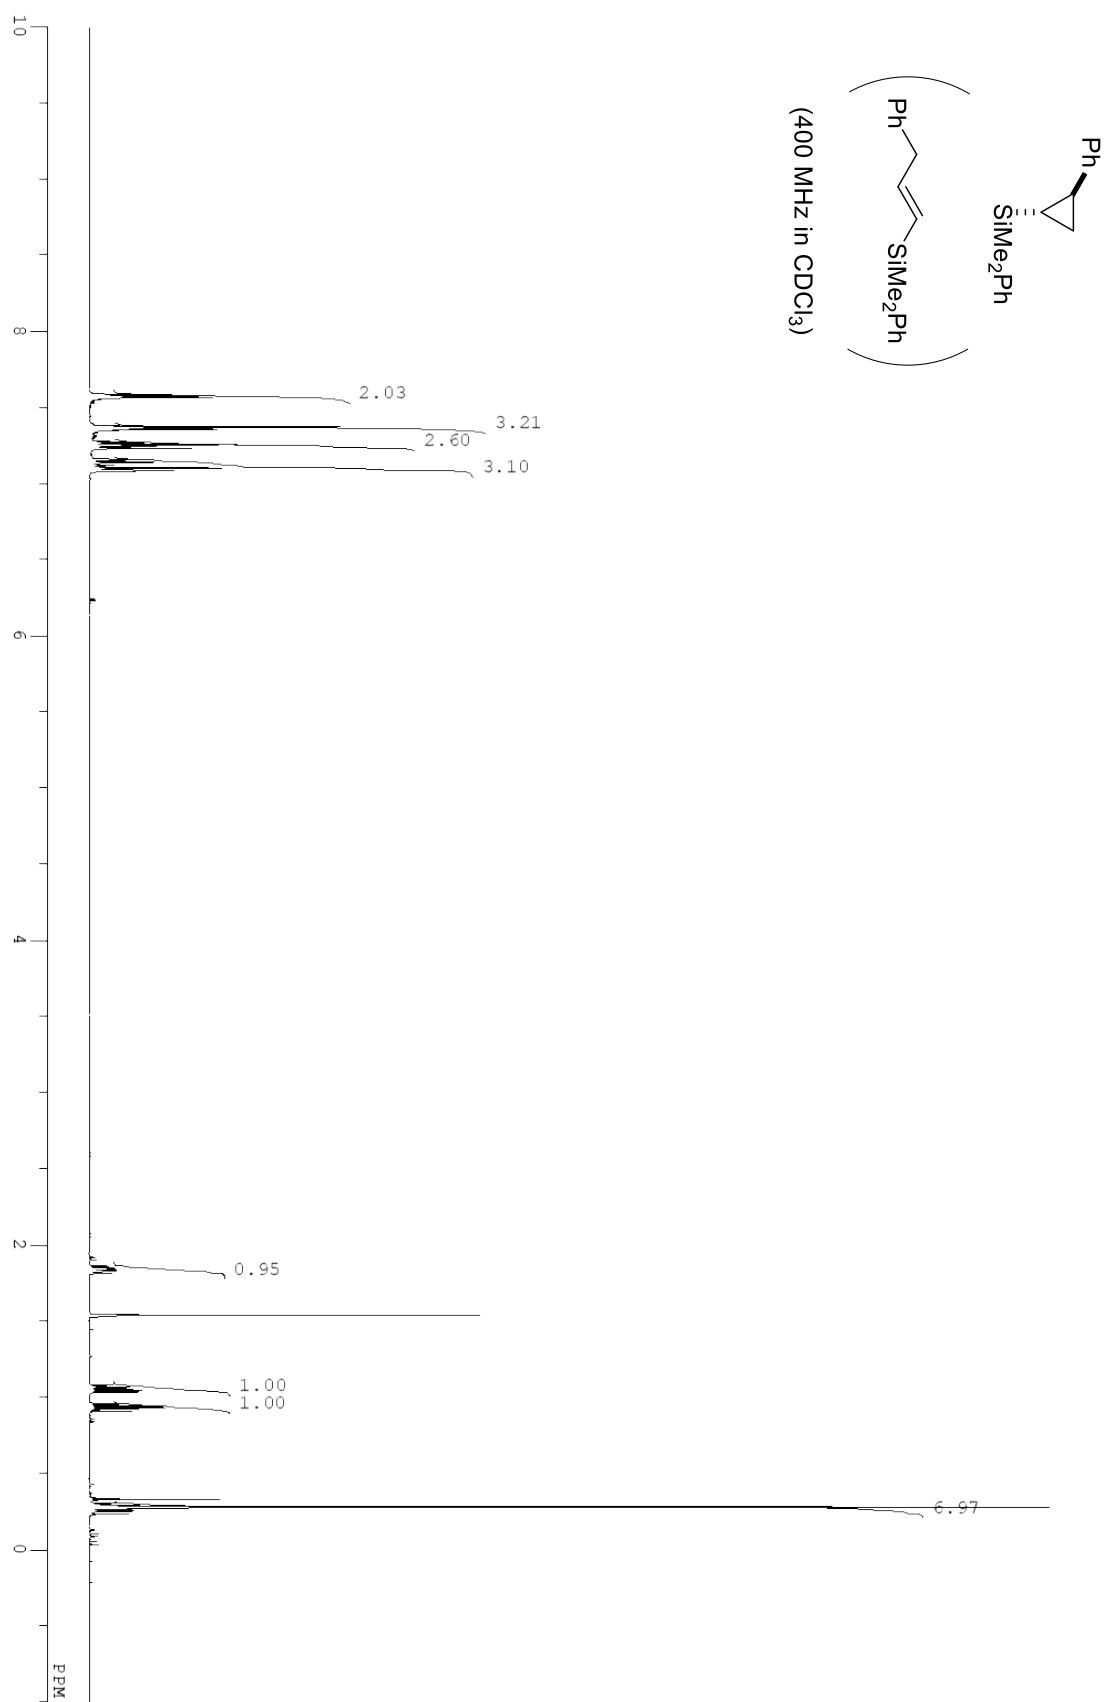

compound S1 (S2)

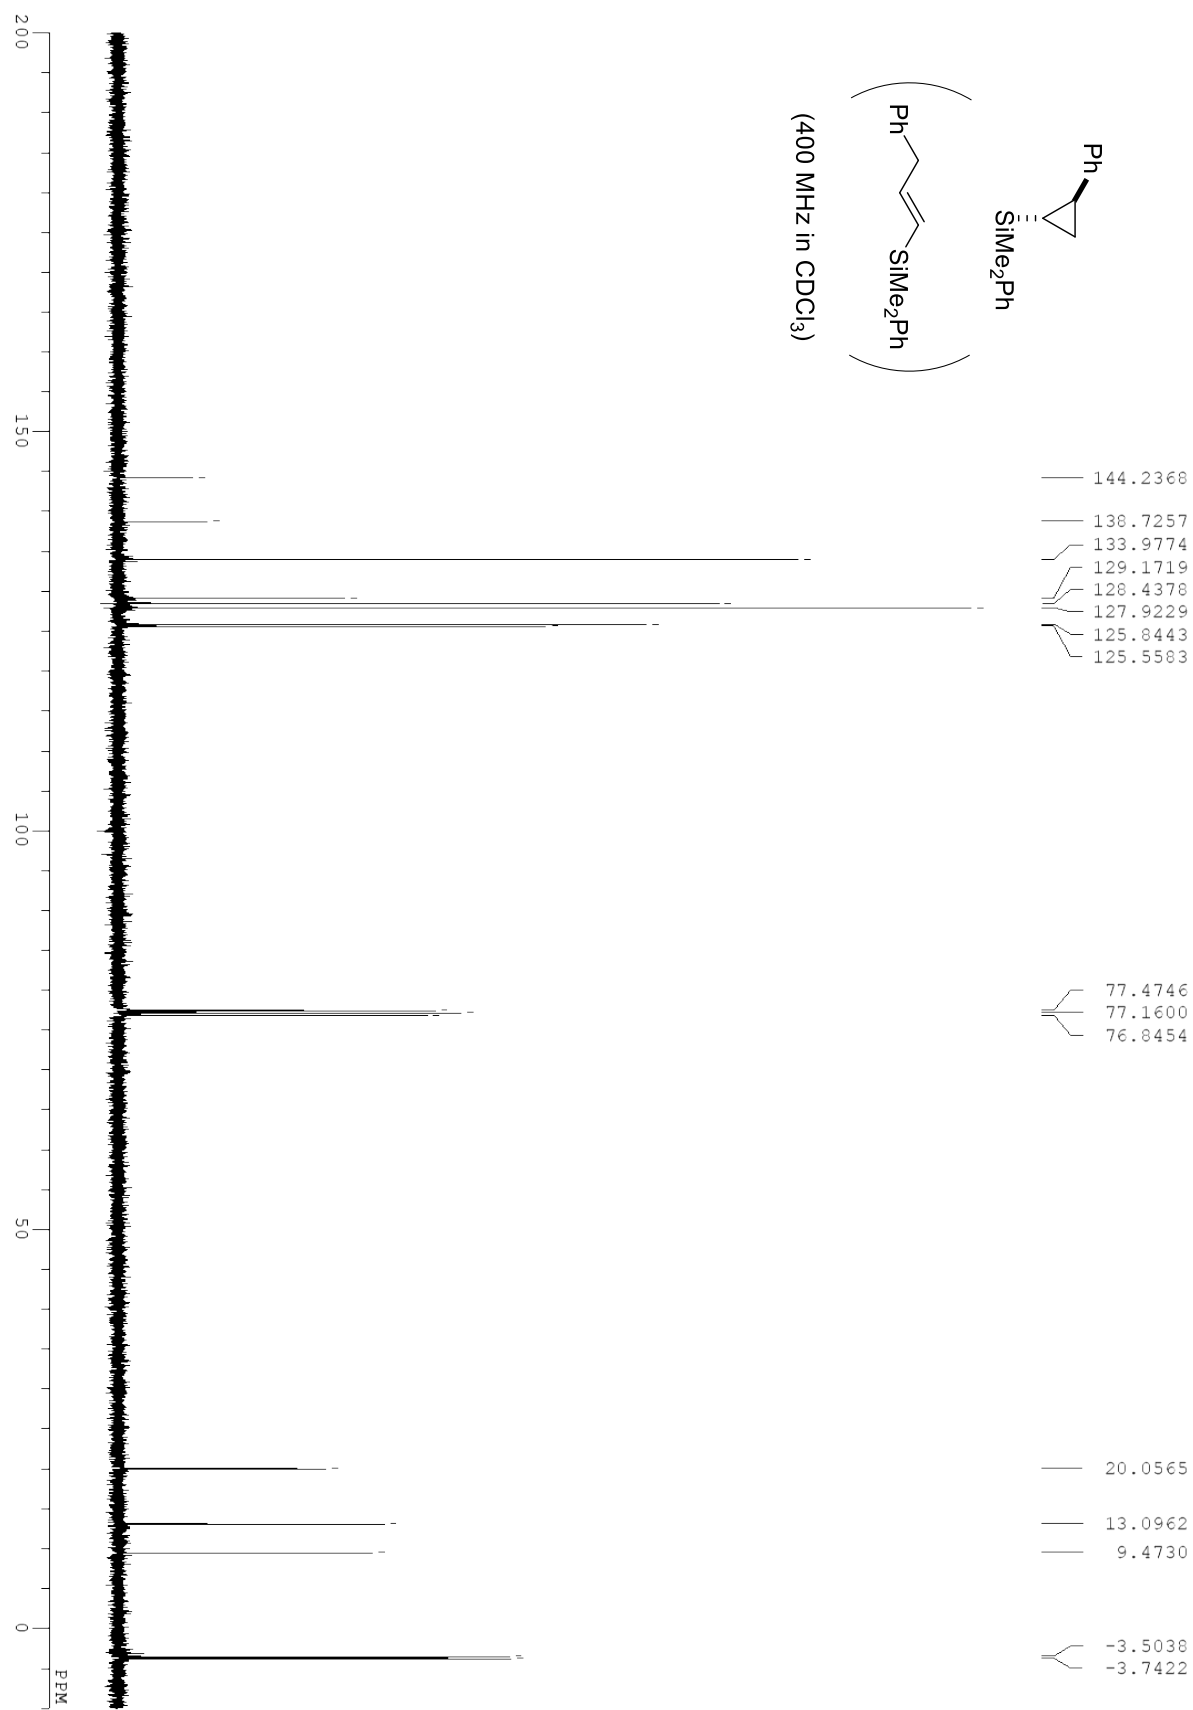

## VI. References

- <sup>1</sup> Murahashi, S.-I.; Taniguchi, Y.; Imada, Y.; Tanigawa, Y. *J. Org. Chem.* **1989**, *54*, 3292.
- <sup>2</sup> Shintani, R.; Fujie, R.; Takeda, M.; Nozaki, K. *Angew. Chem., Int. Ed.* **2014**, *53*, 6546.
- <sup>3</sup> Maslak, V.; Tokic-Vujosevic, Z.; Saicic, R. N. *Tetrahedron Lett.* **2009**, *50*, 1858.
- <sup>4</sup> Shintani, R.; Takatsu, K.; Takeda, M.; Hayashi, T. *Angew. Chem., Int. Ed.* **2011**, *50*, 8656.
- <sup>5</sup> Kawashima, H.; Ogawa, N.; Saeki, R.; Kobayashi, Y. *Chem. Commun.* **2016**, *52*, 4918.
- <sup>6</sup> Shi, Y.; Jung, B.; Torker, S.; Hoveyda, A. H. *J. Am Chem. Soc.* **2015**, *137*, 8948.
- <sup>7</sup> Xu, Q.-L.; Dai, L.-X.; You, S.-L. *Org. Lett.* **2010**, *12*, 800.
- <sup>8</sup> Li, H.; Chen, H.; Zhou, Y.; Huang, J.; Yi, J.; Zhao, H.; Wang, W.; Jing, L. *Chem. Asian J.* **2020**, *15*, 555.
- <sup>9</sup> Horn, A.; Kazmaier, U. *Org. Lett.* **2019**, *21*, 4595.
